# Supplementary material for: A framework for reconstructing SARS-CoV-2 transmission dynamics using excess mortality data
Source: bioRxiv or medRxiv preprint supplement (doi:10.1101/2021.10.04.21264540), 2022-01-04

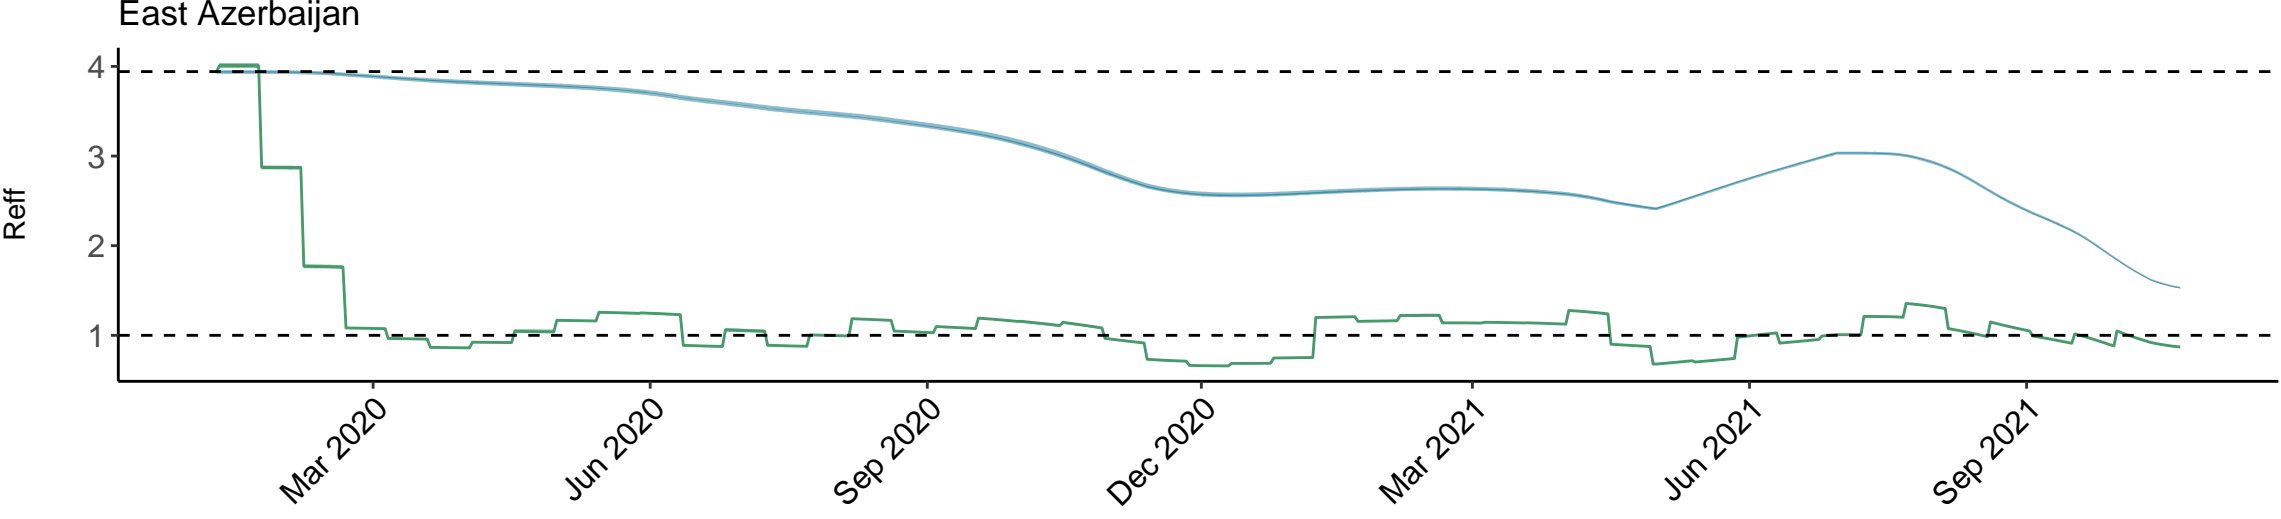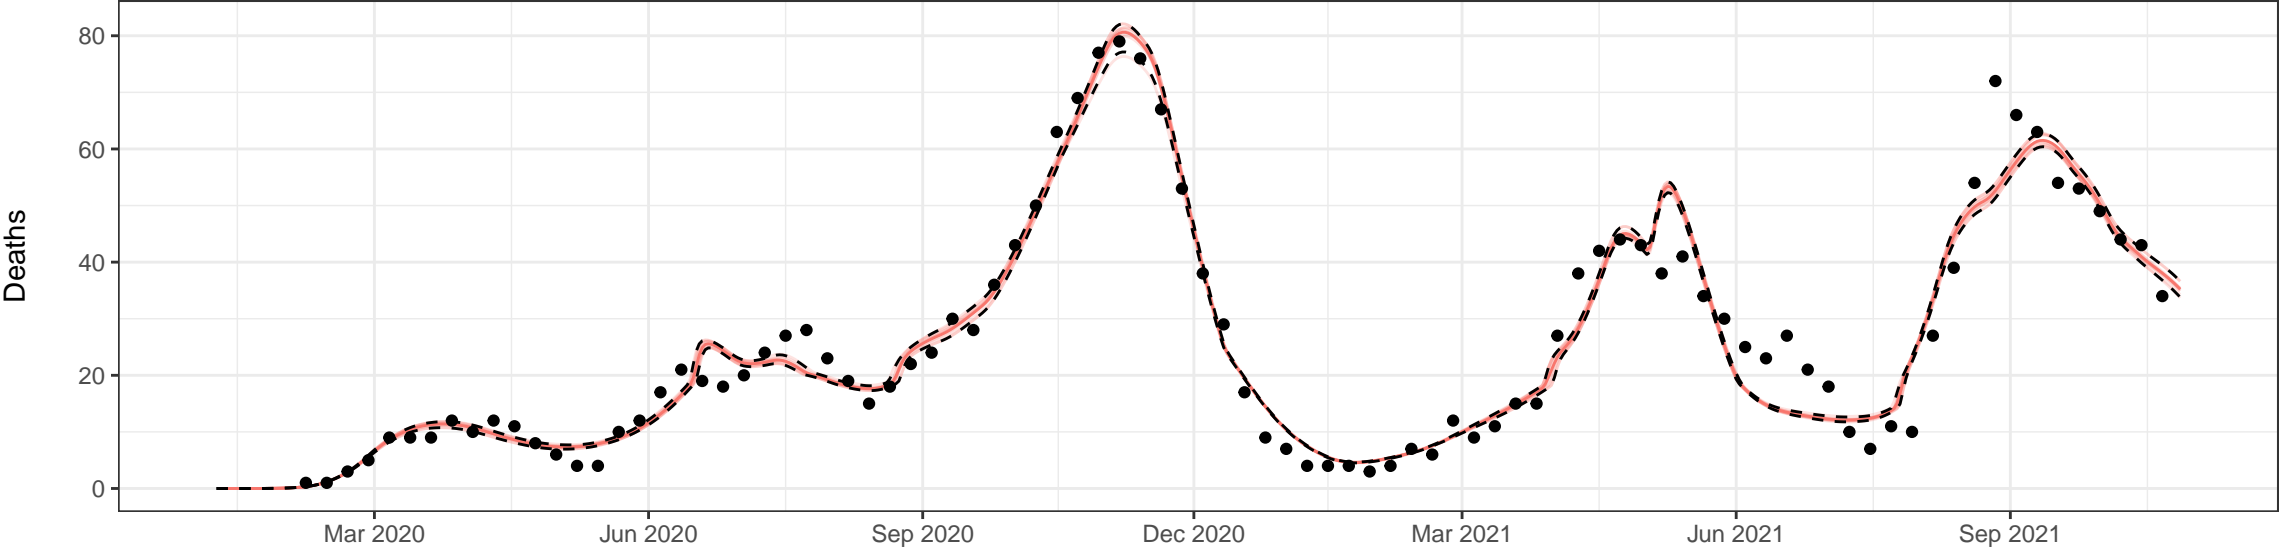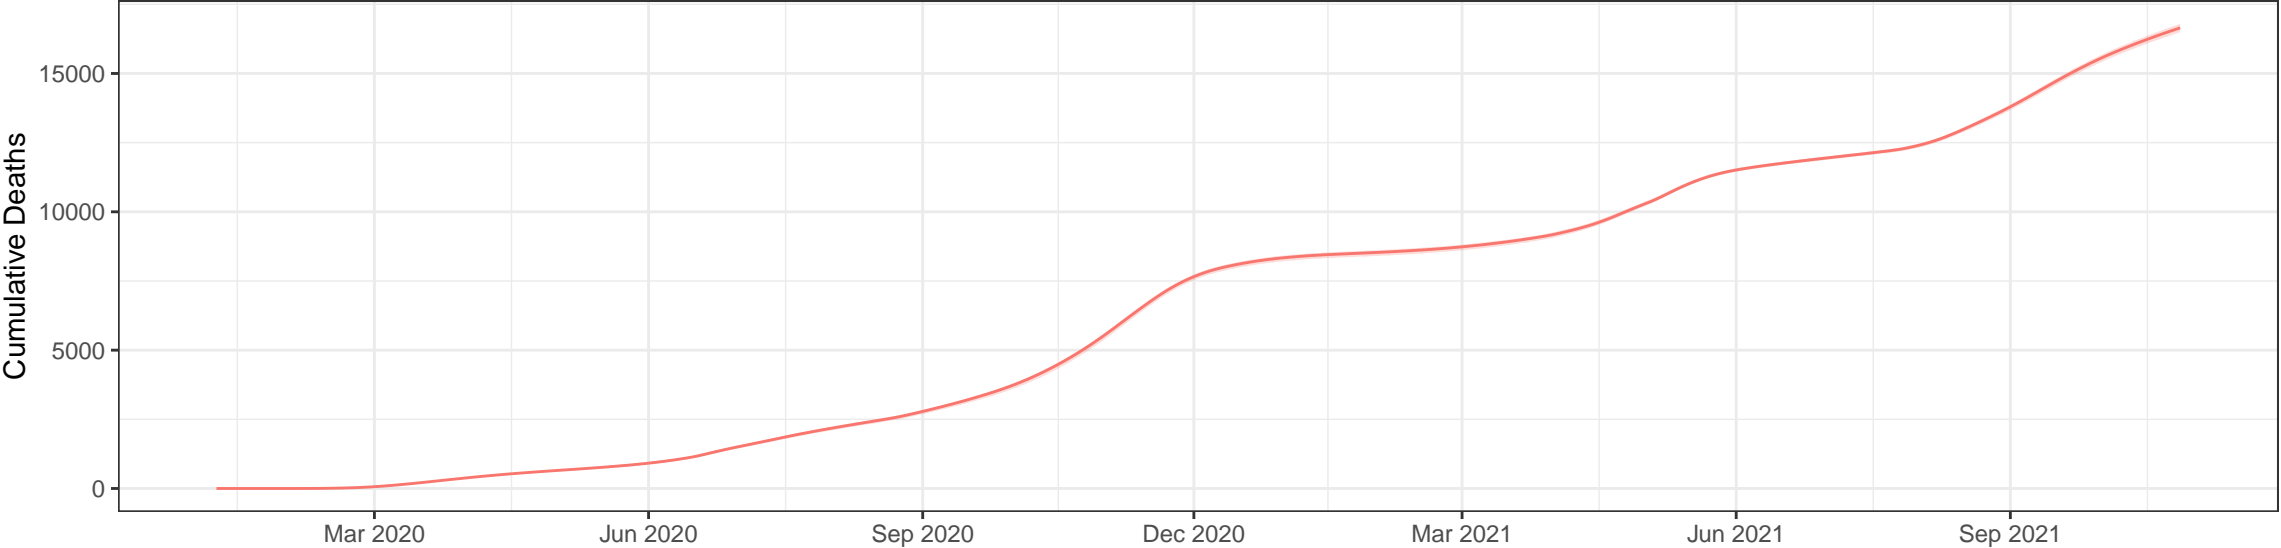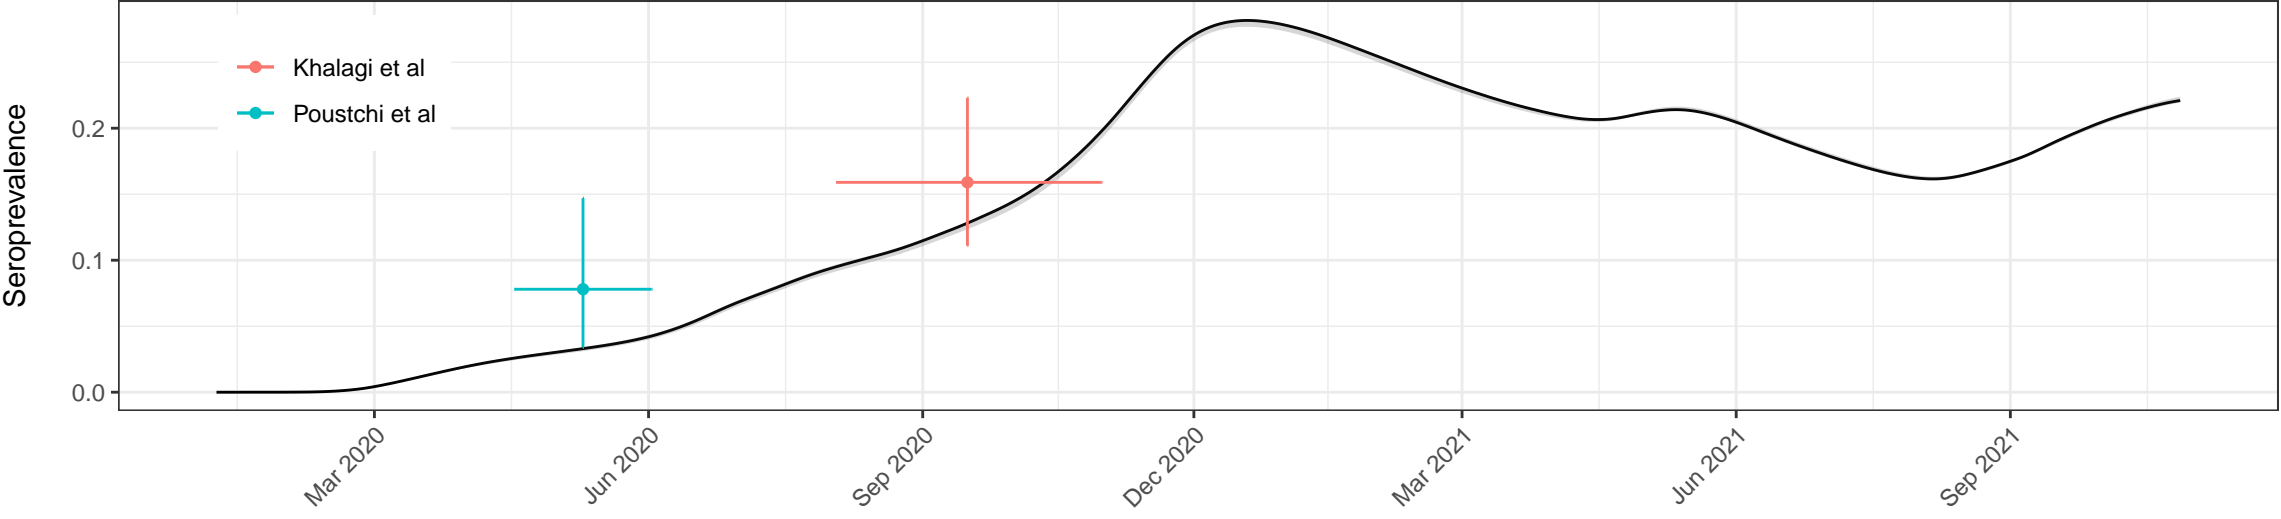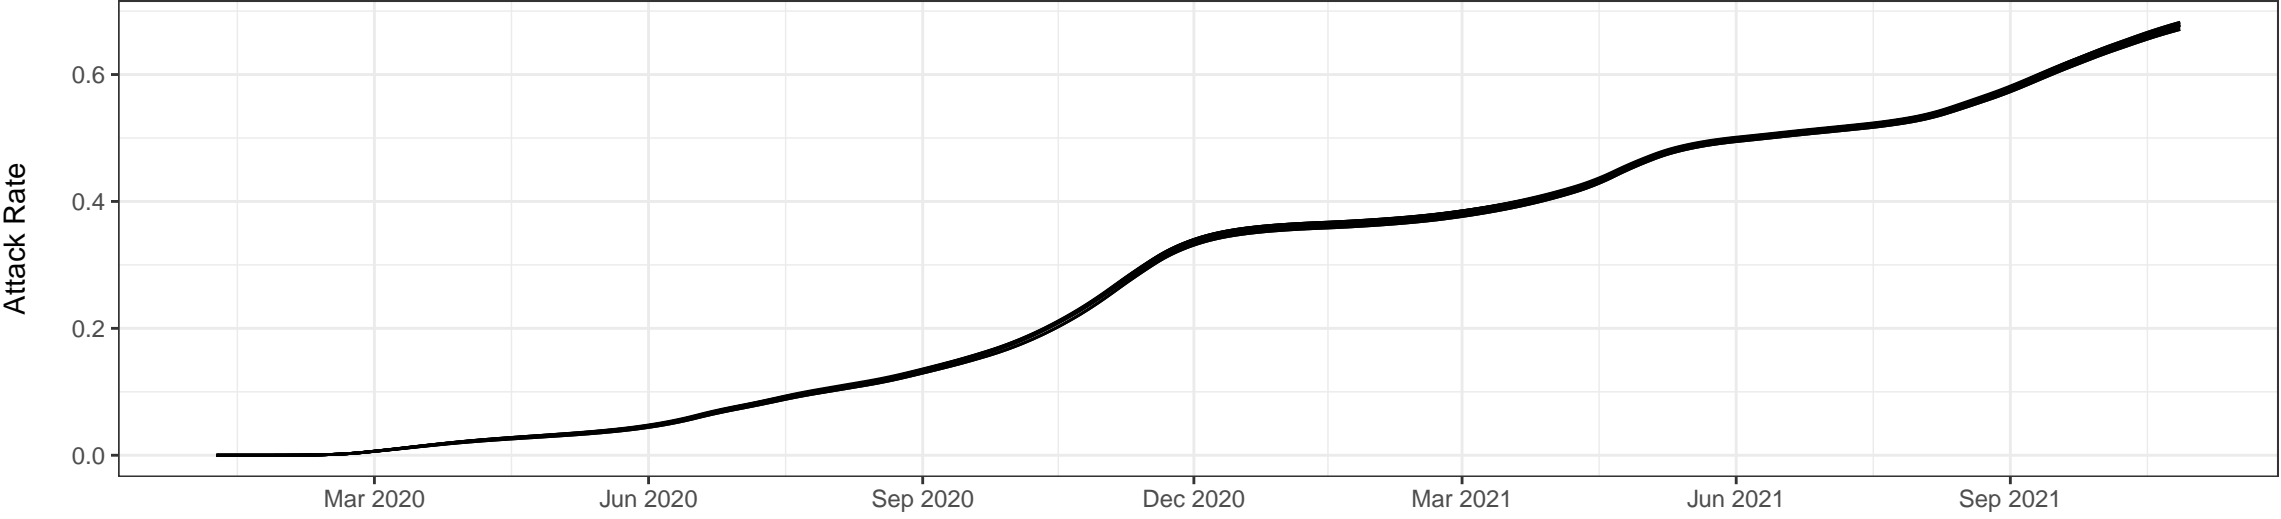

West Azerbaijan

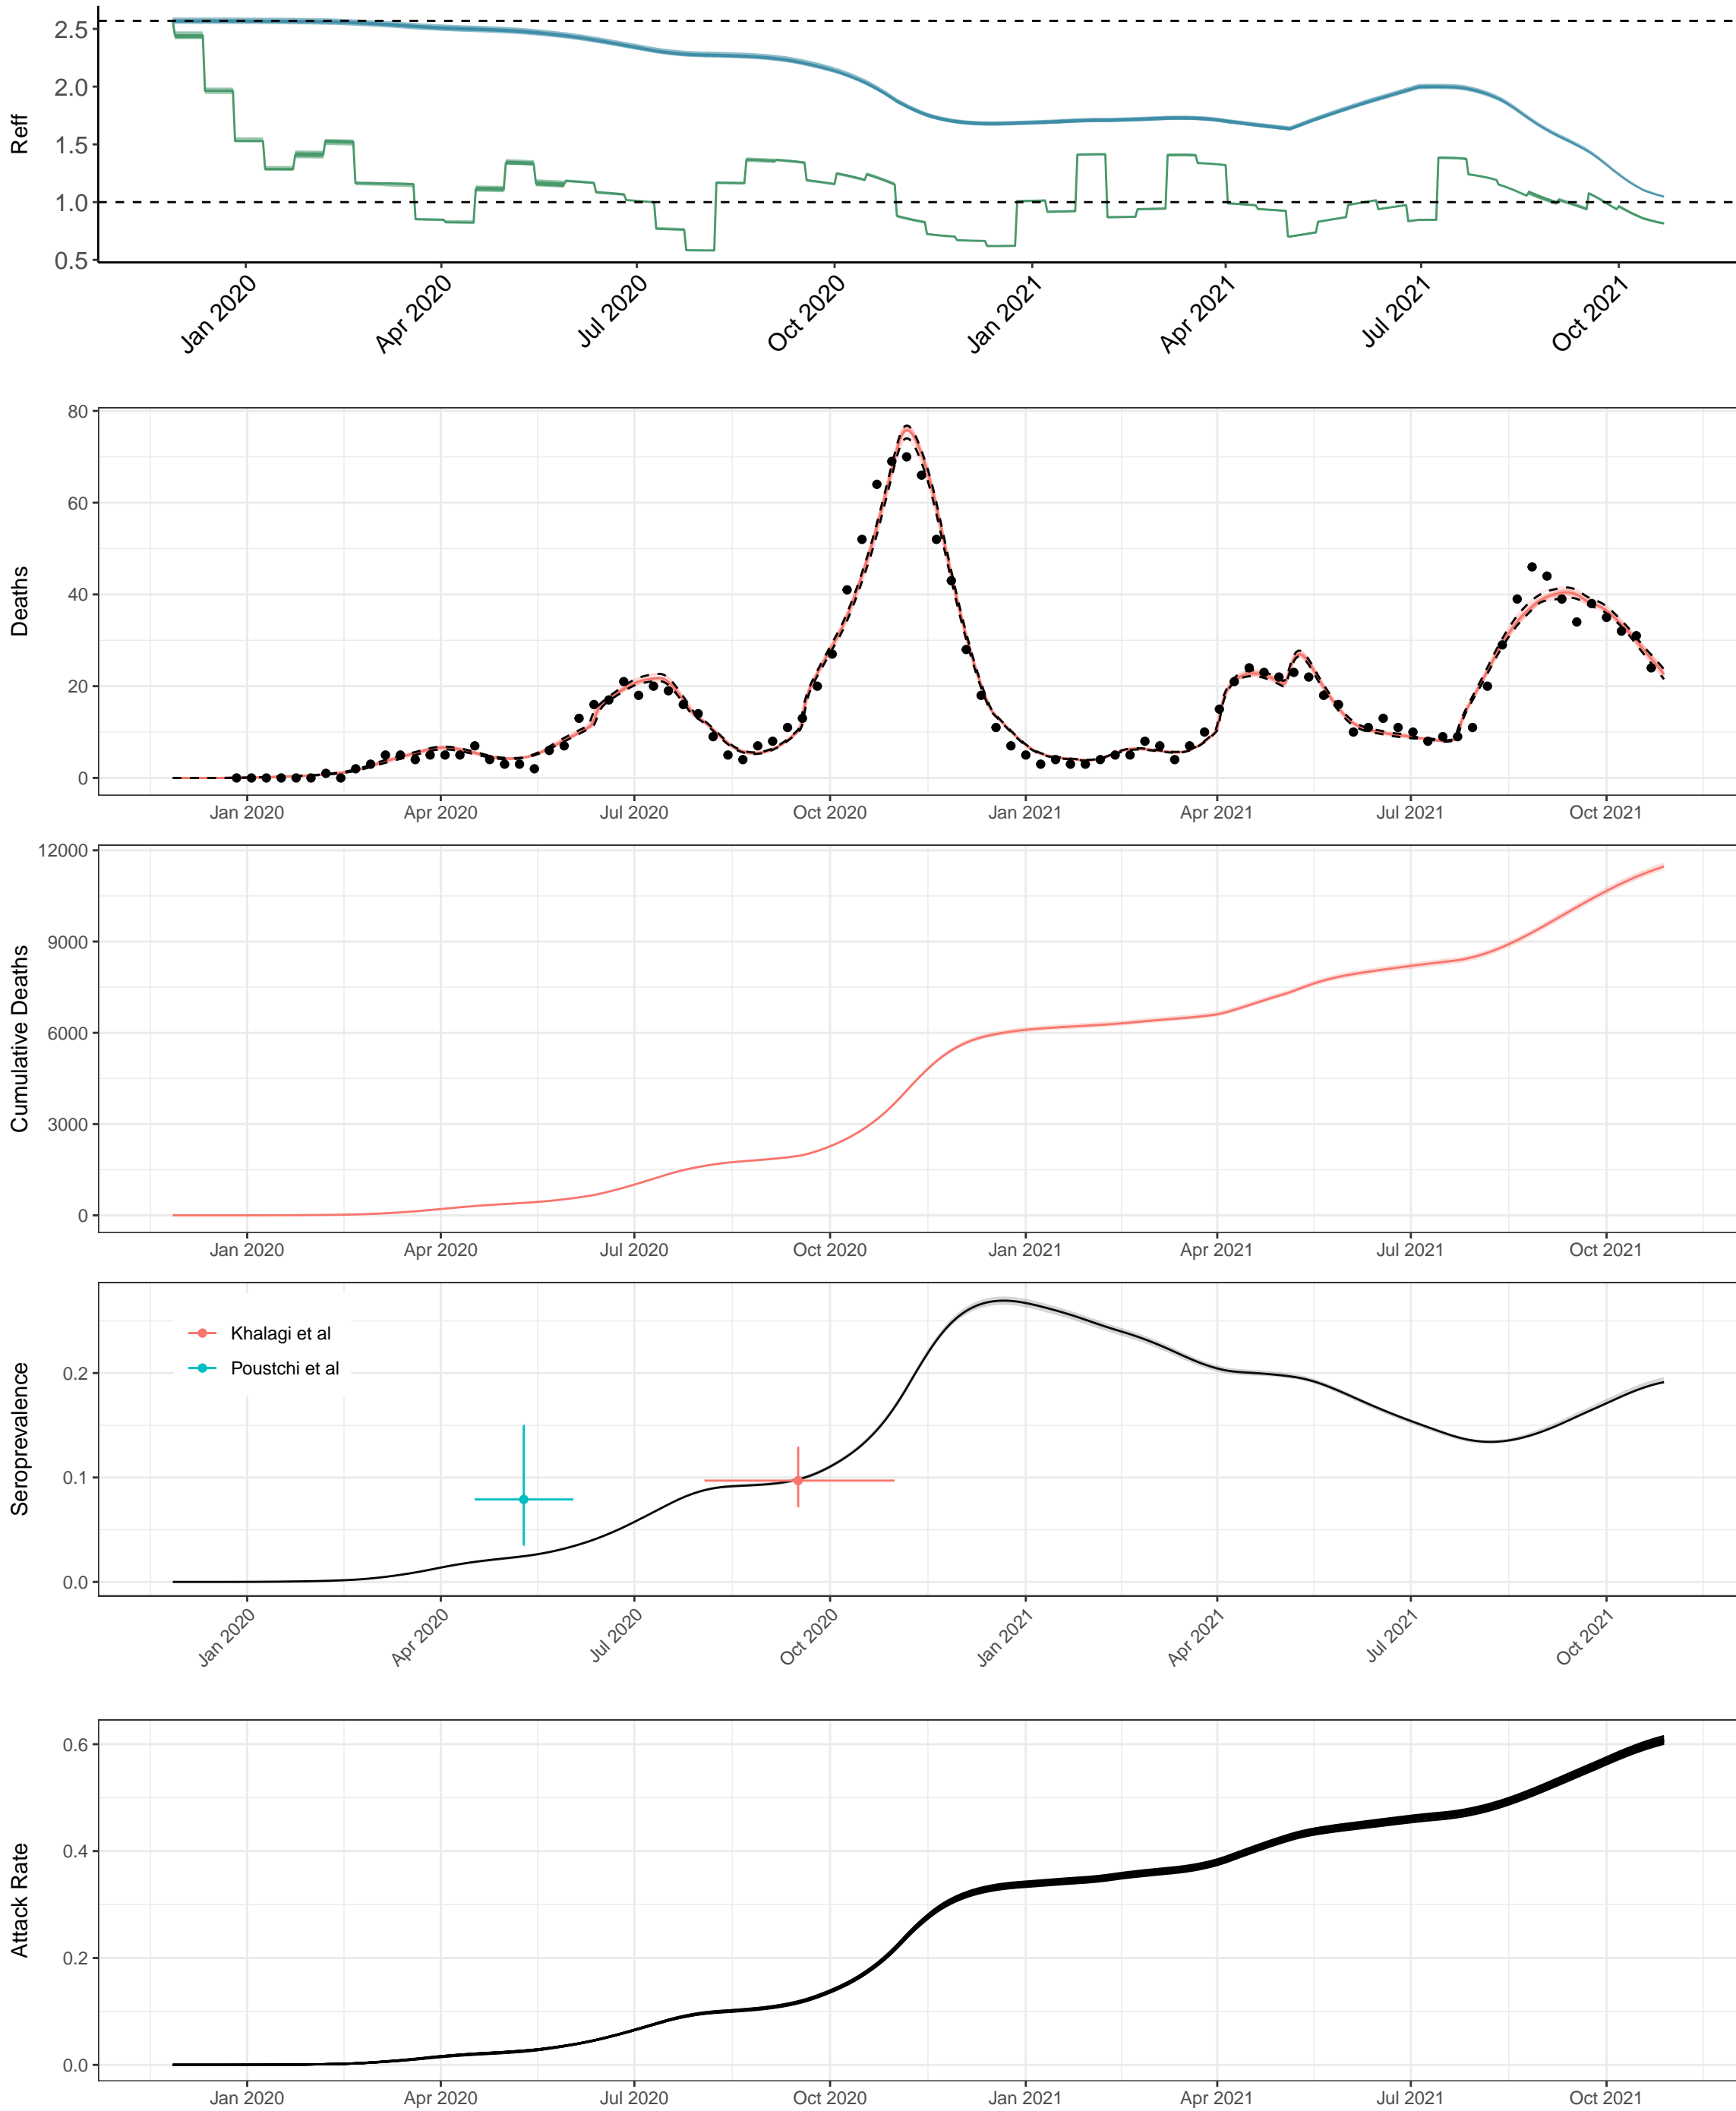

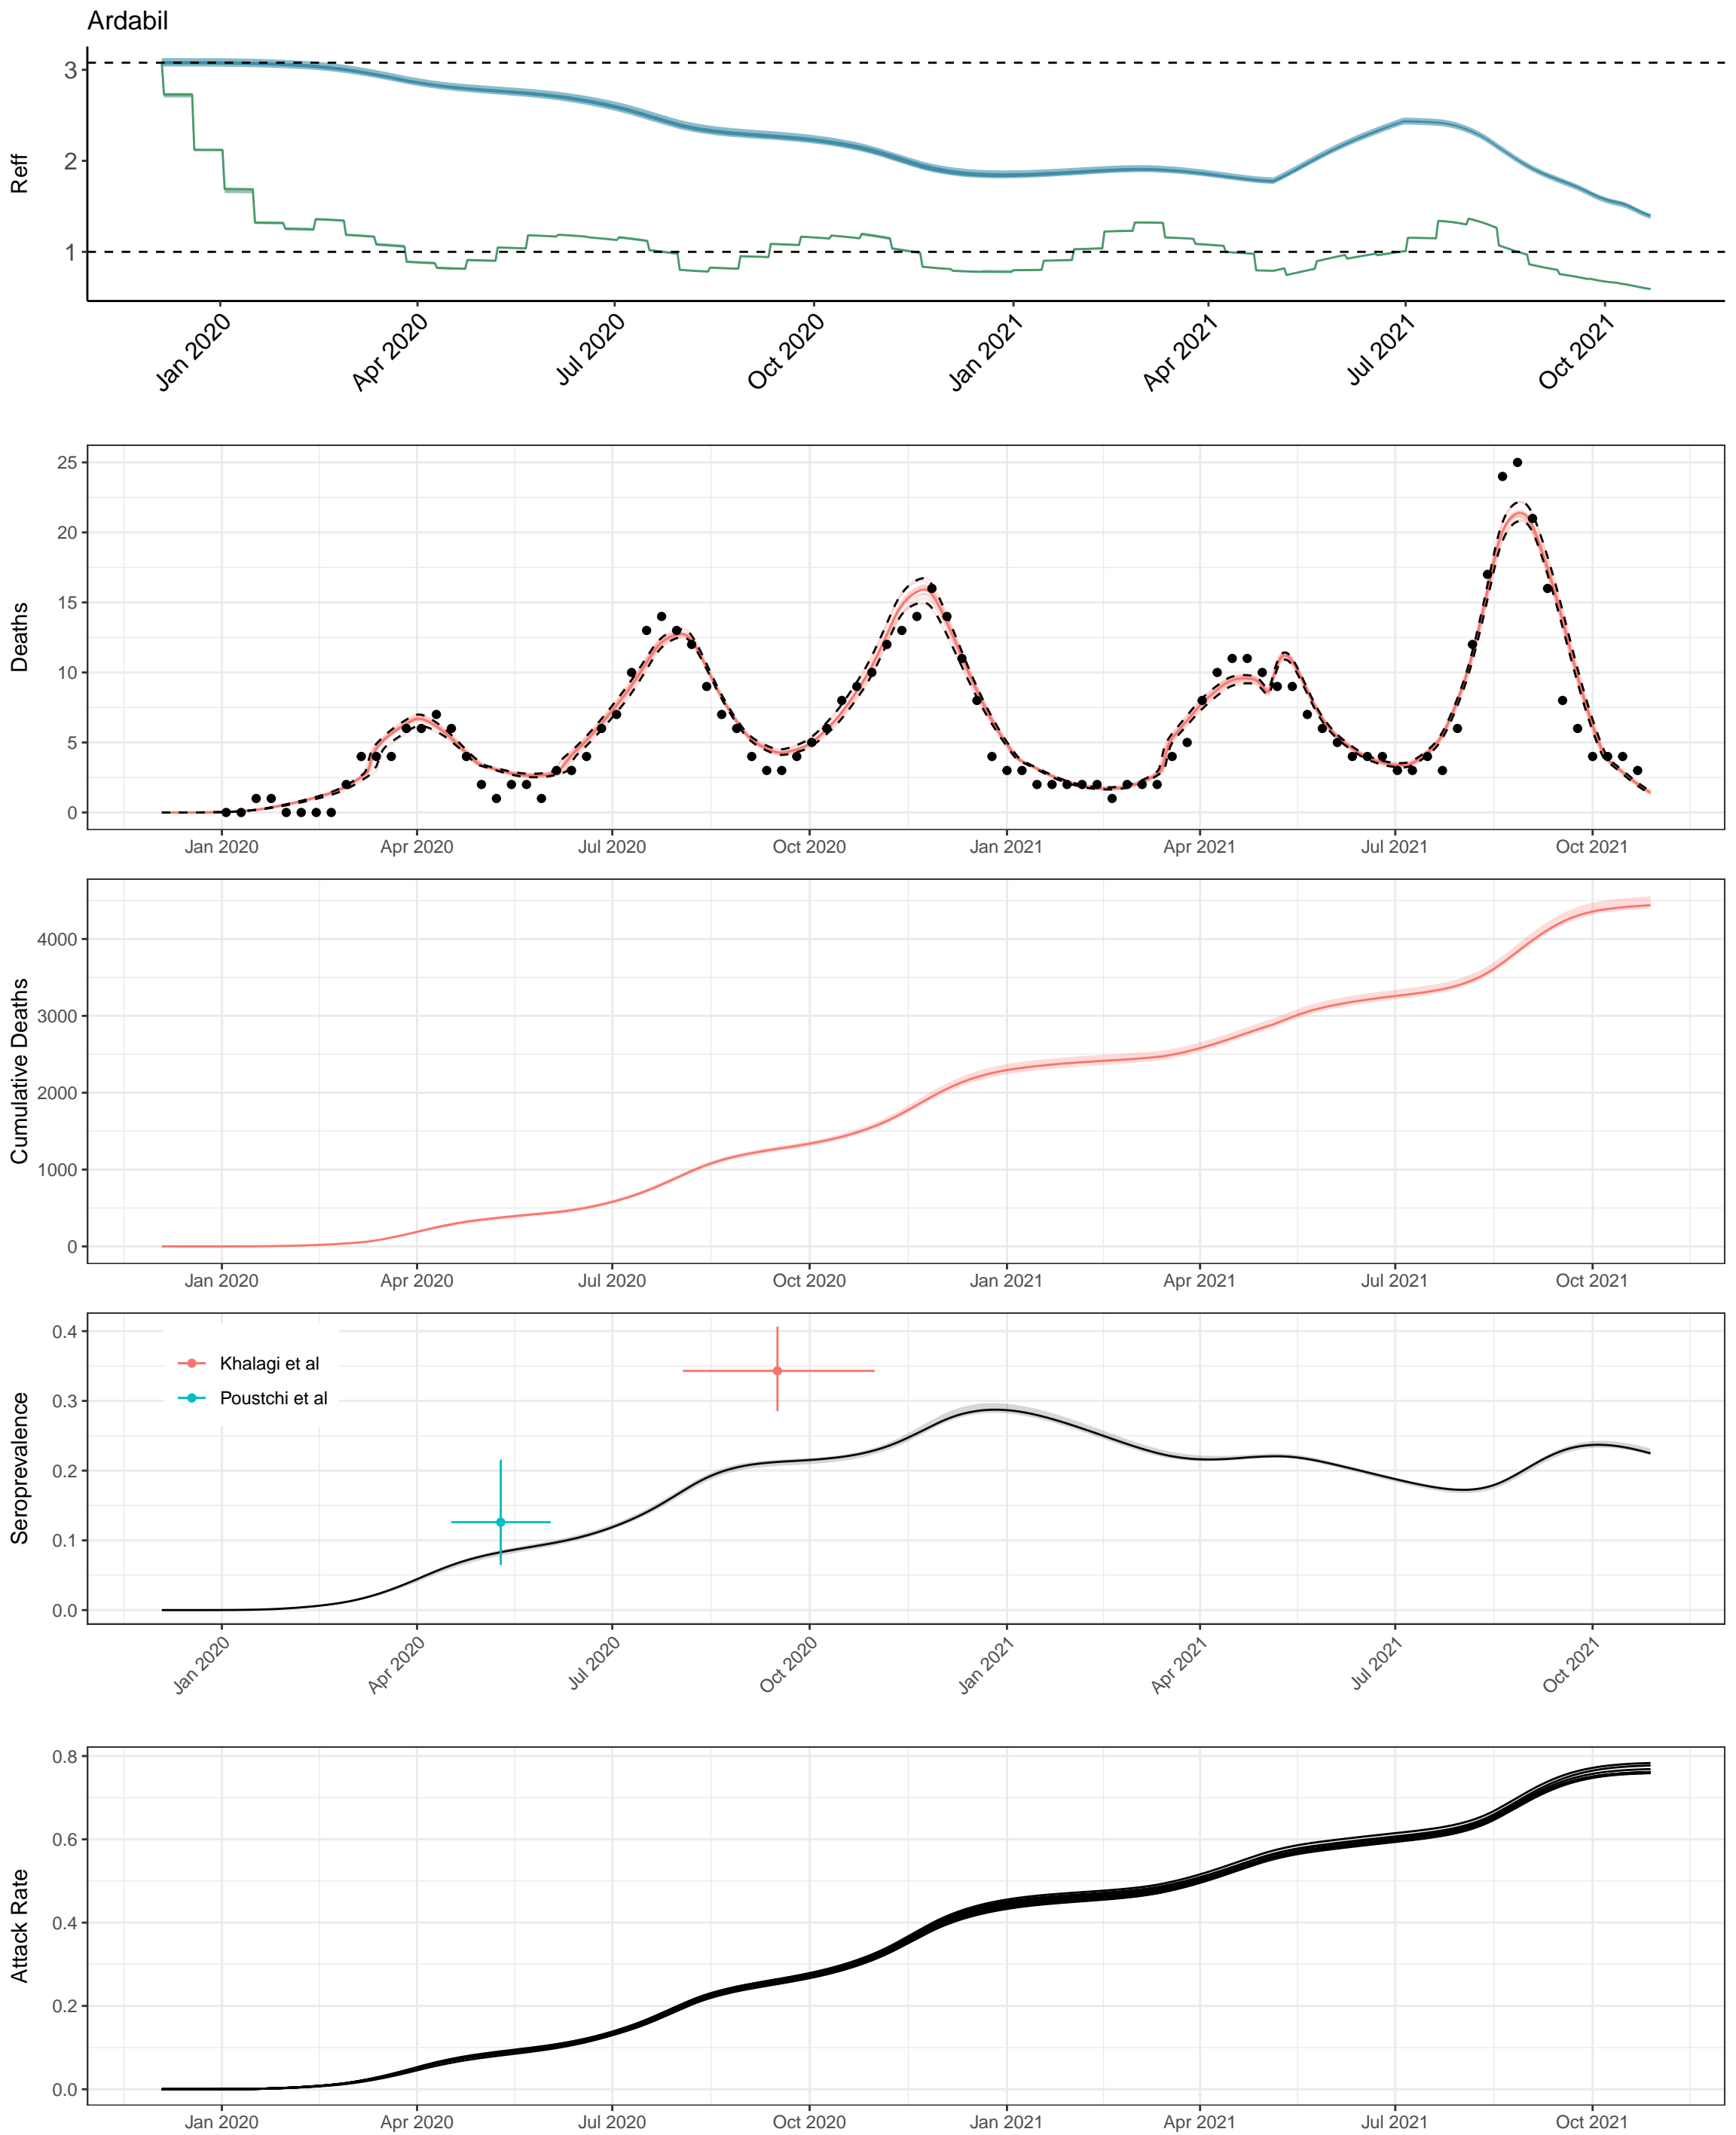

Isfahan

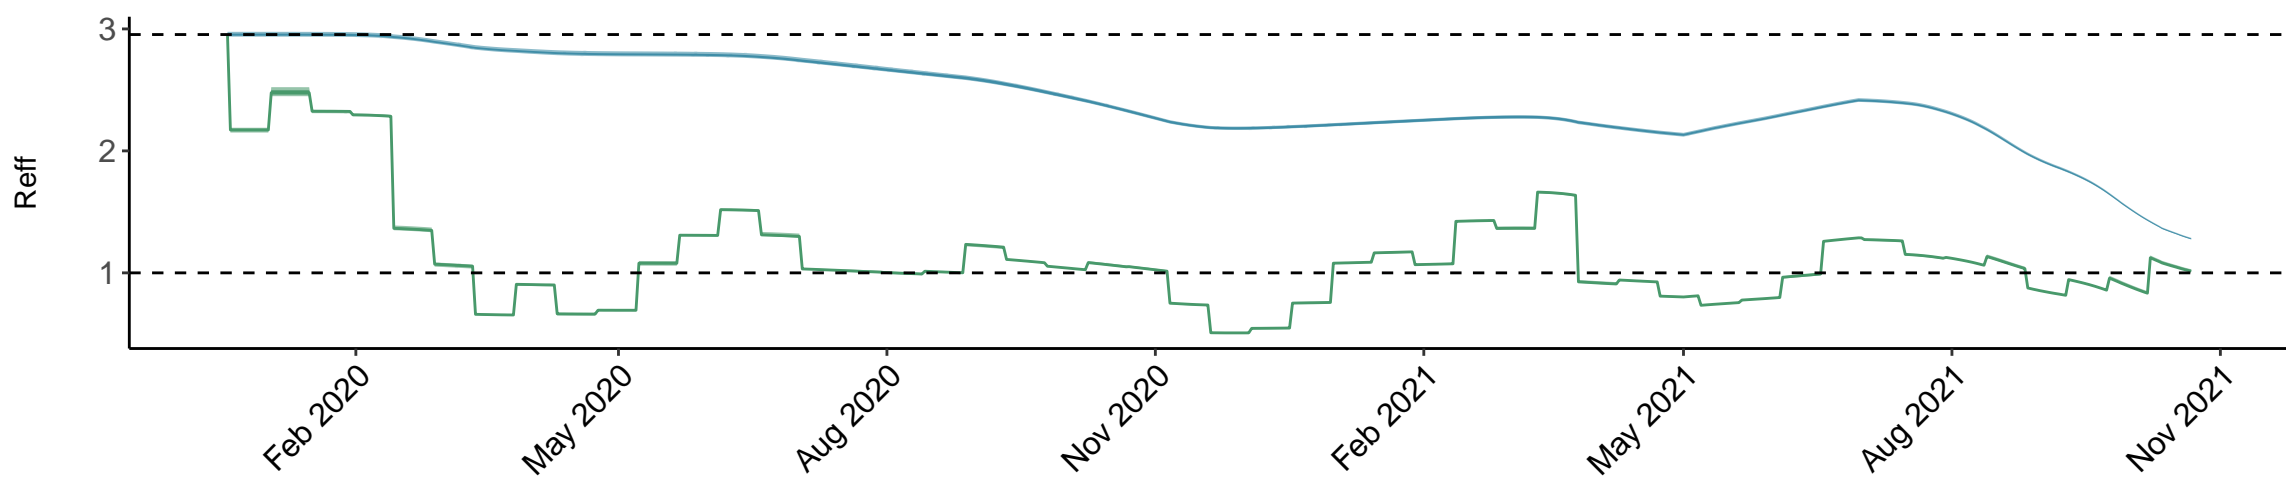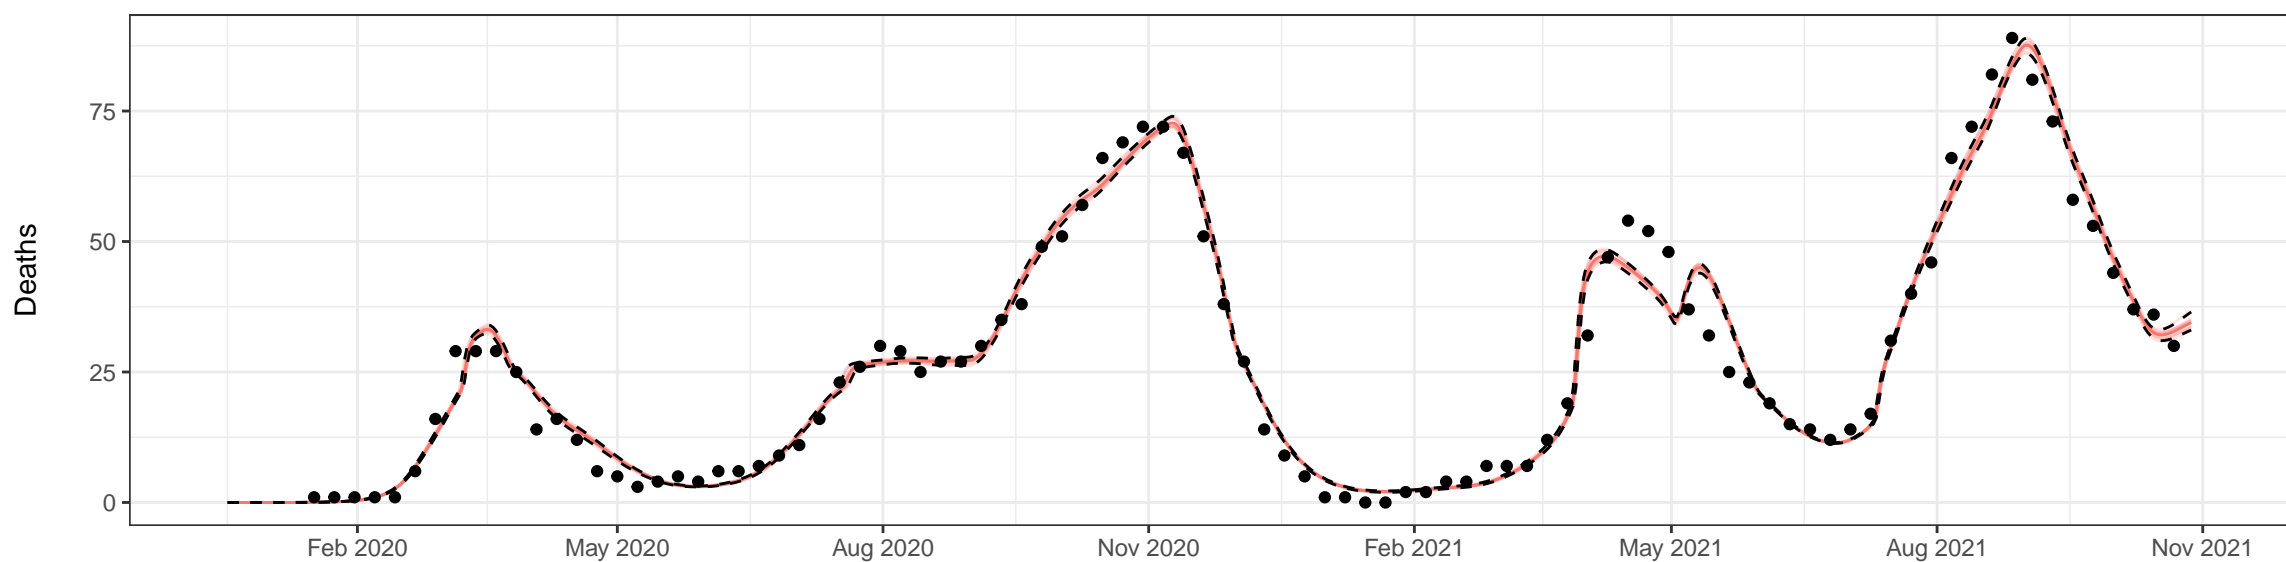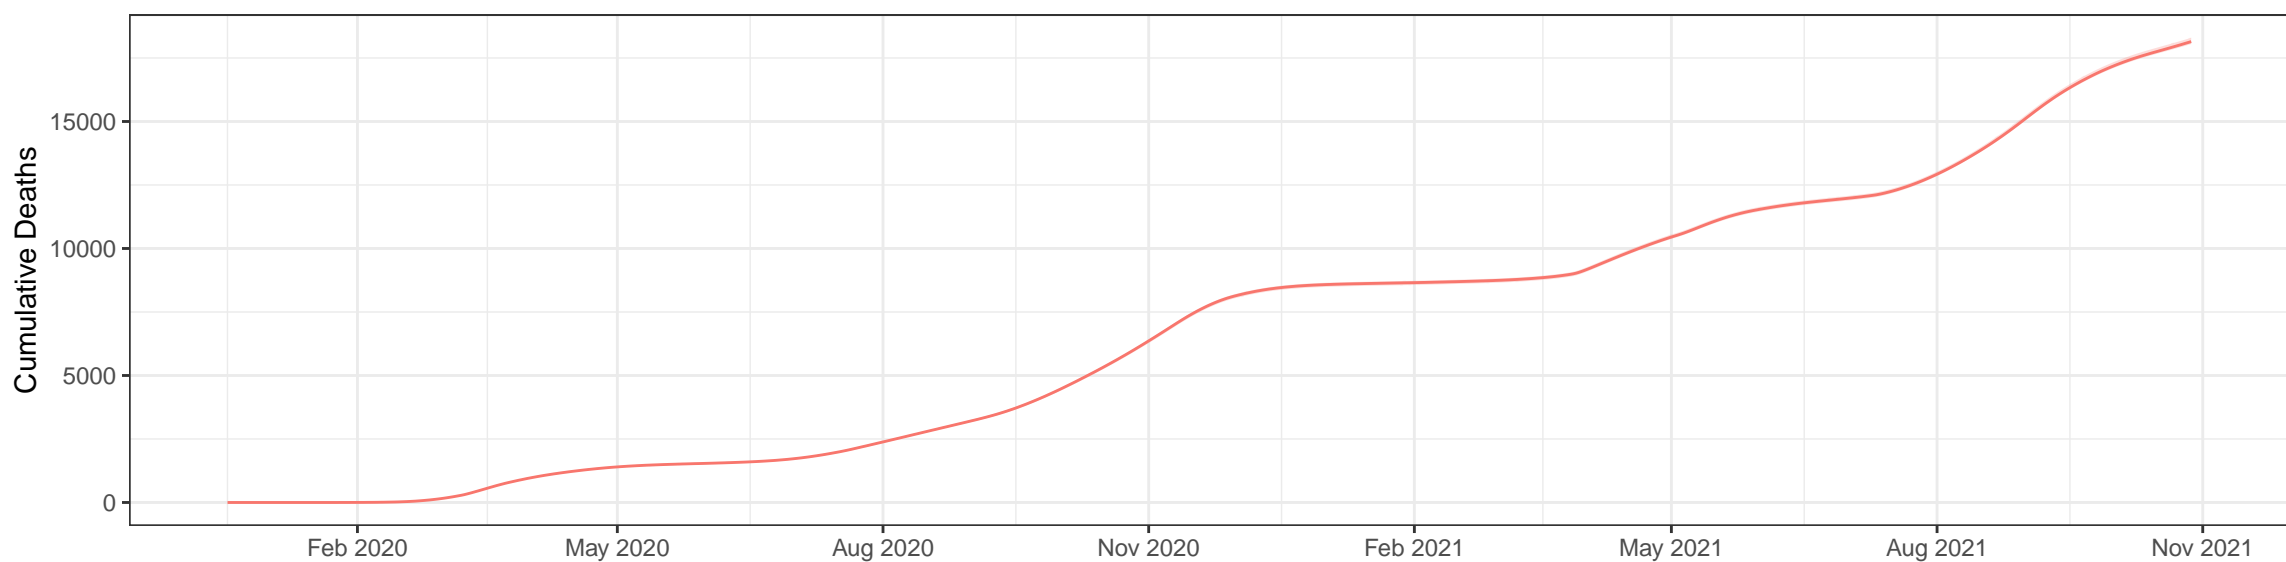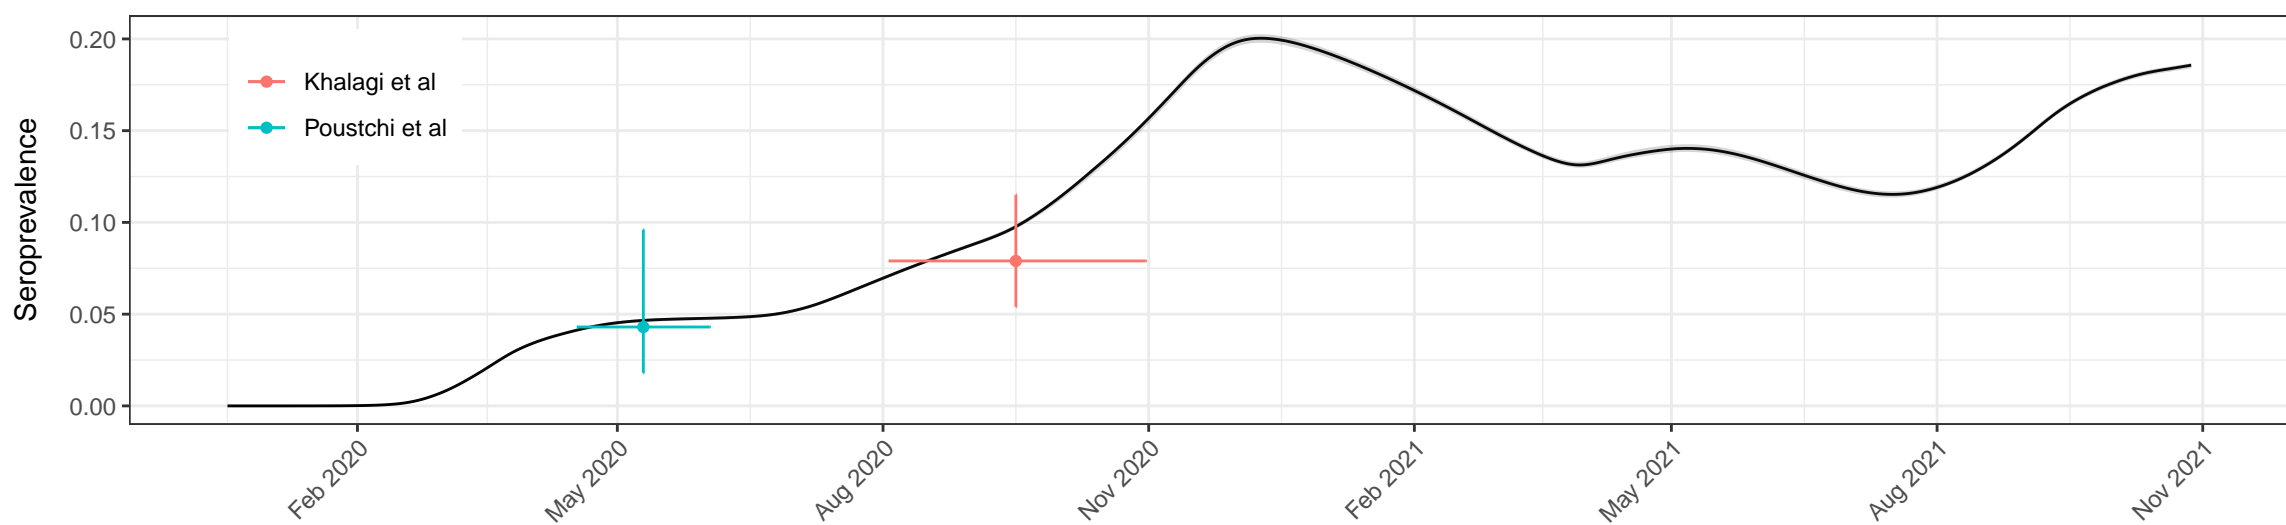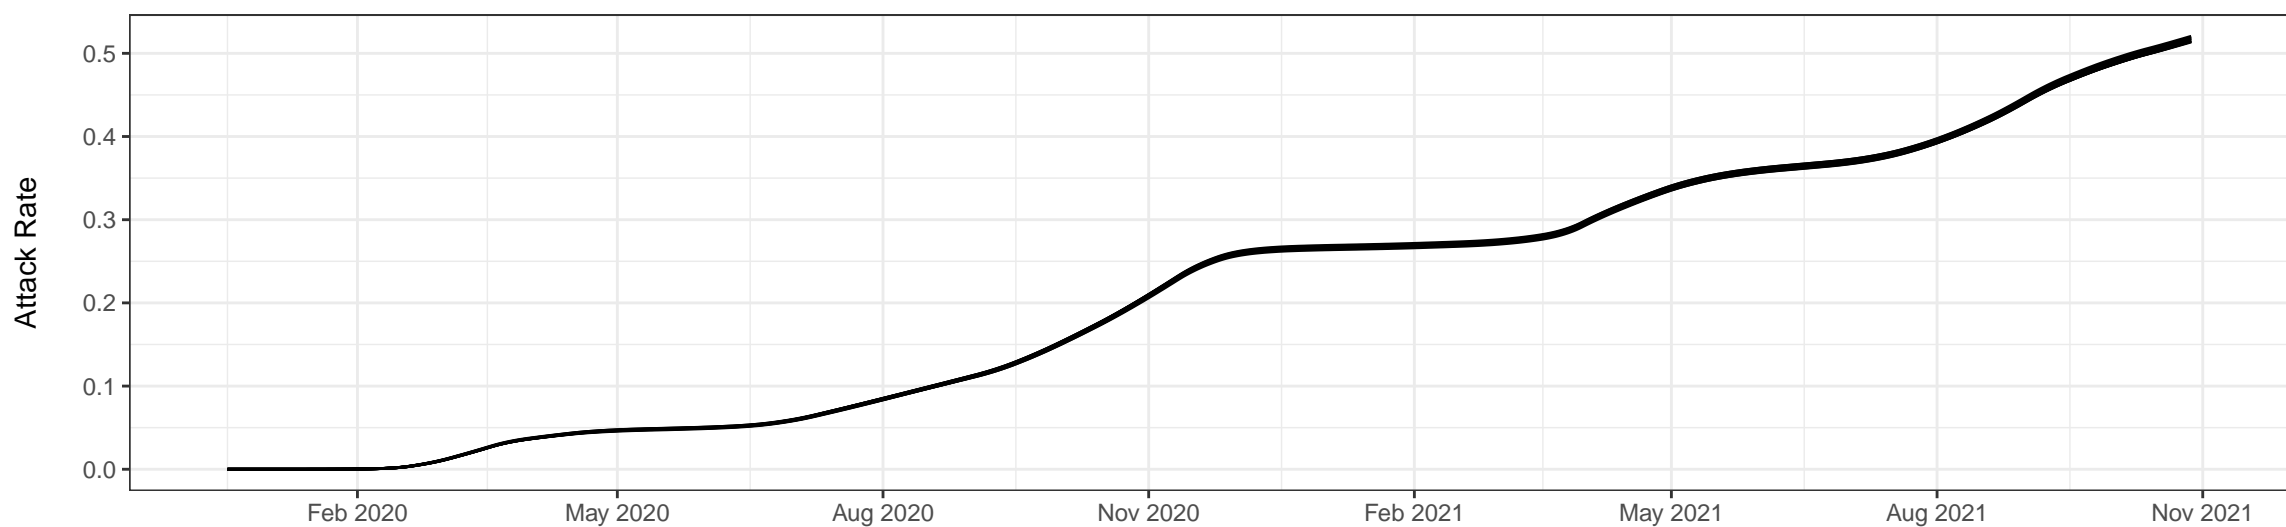

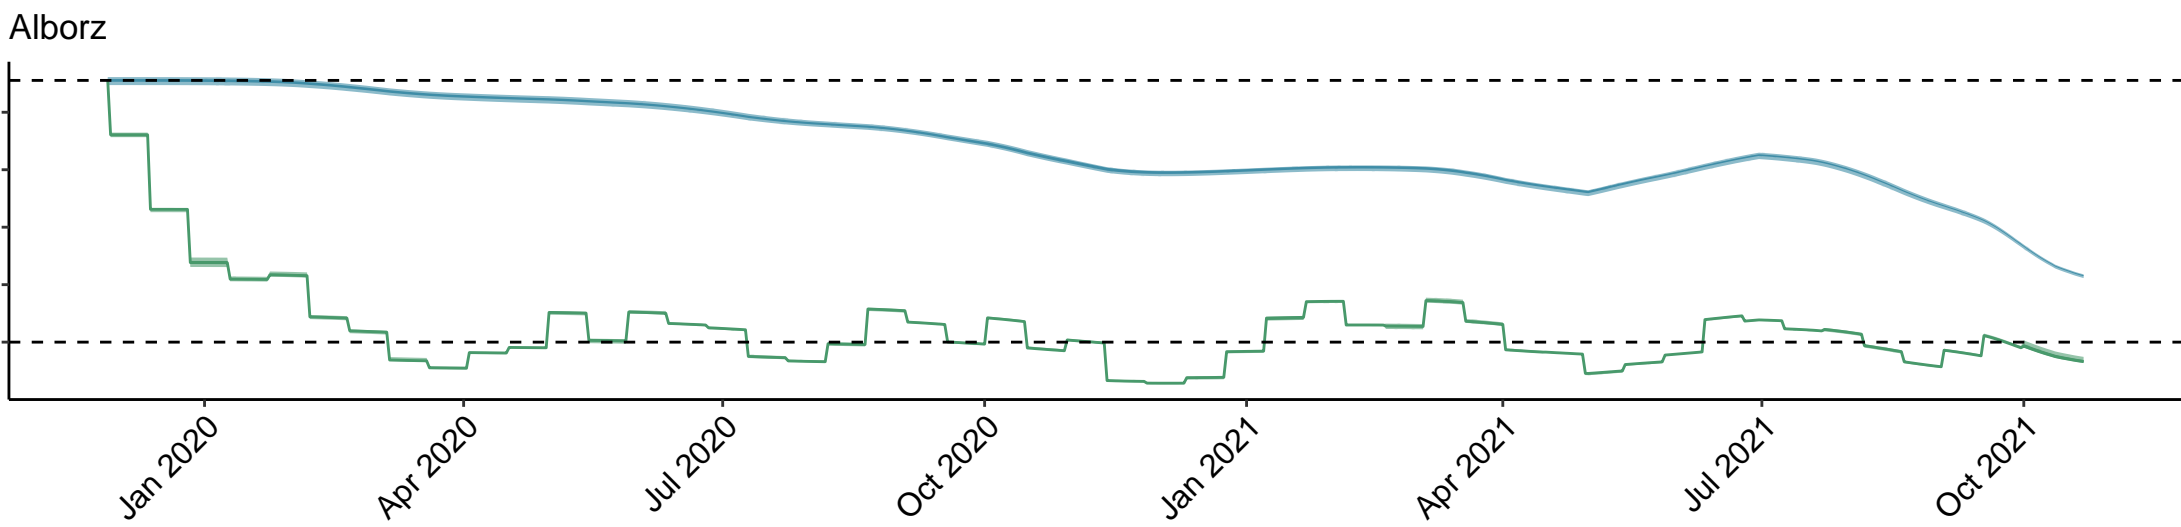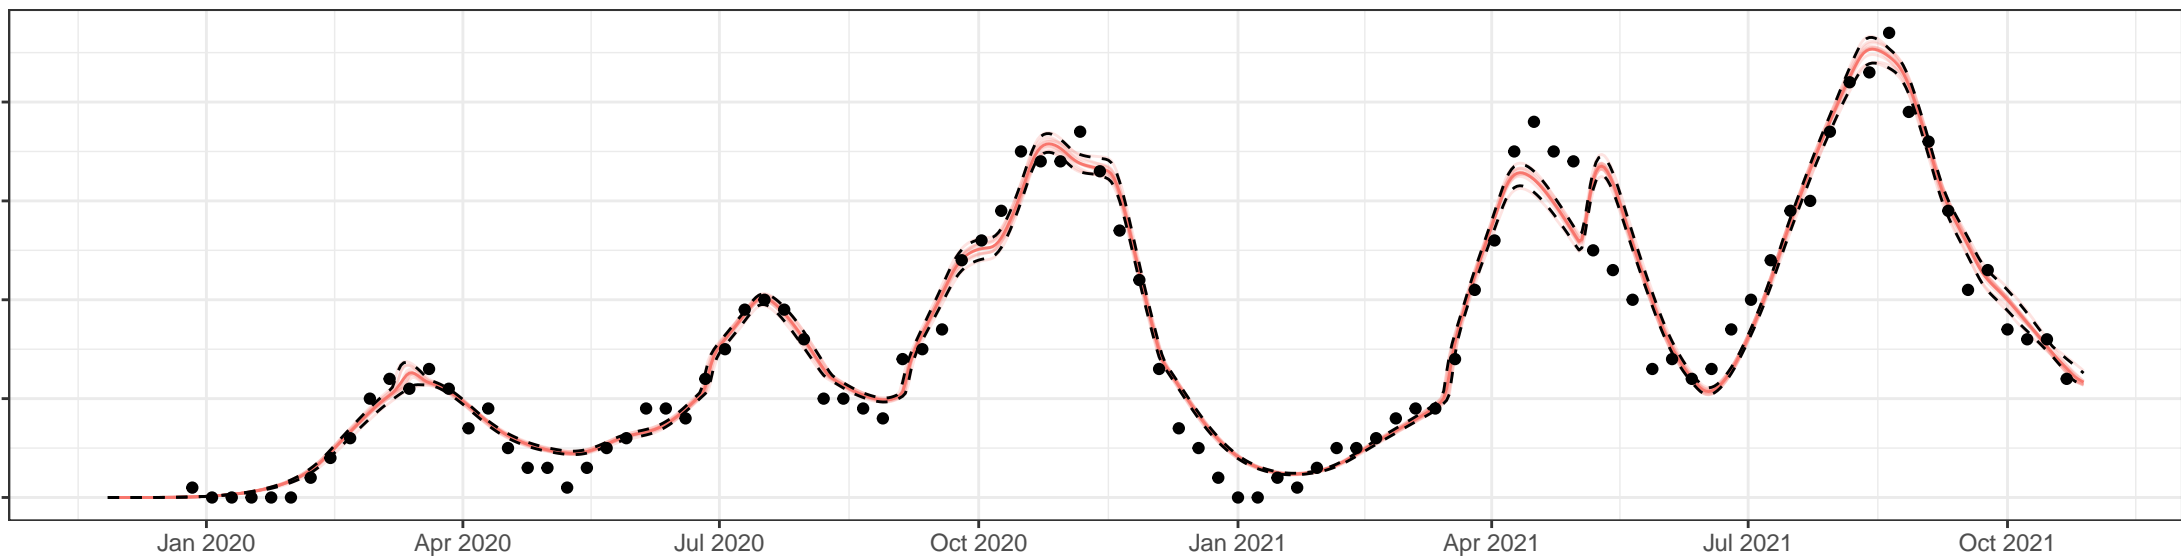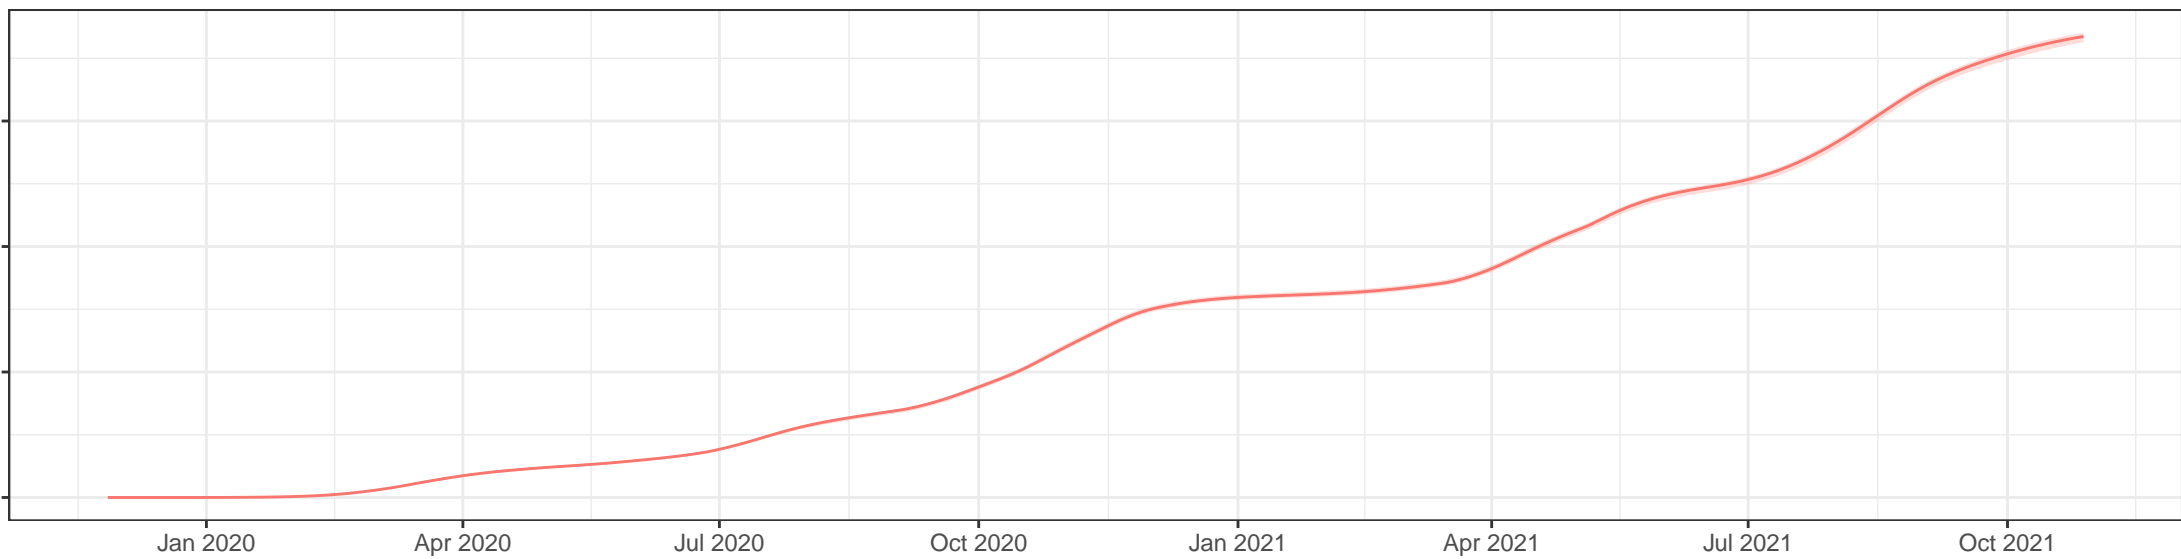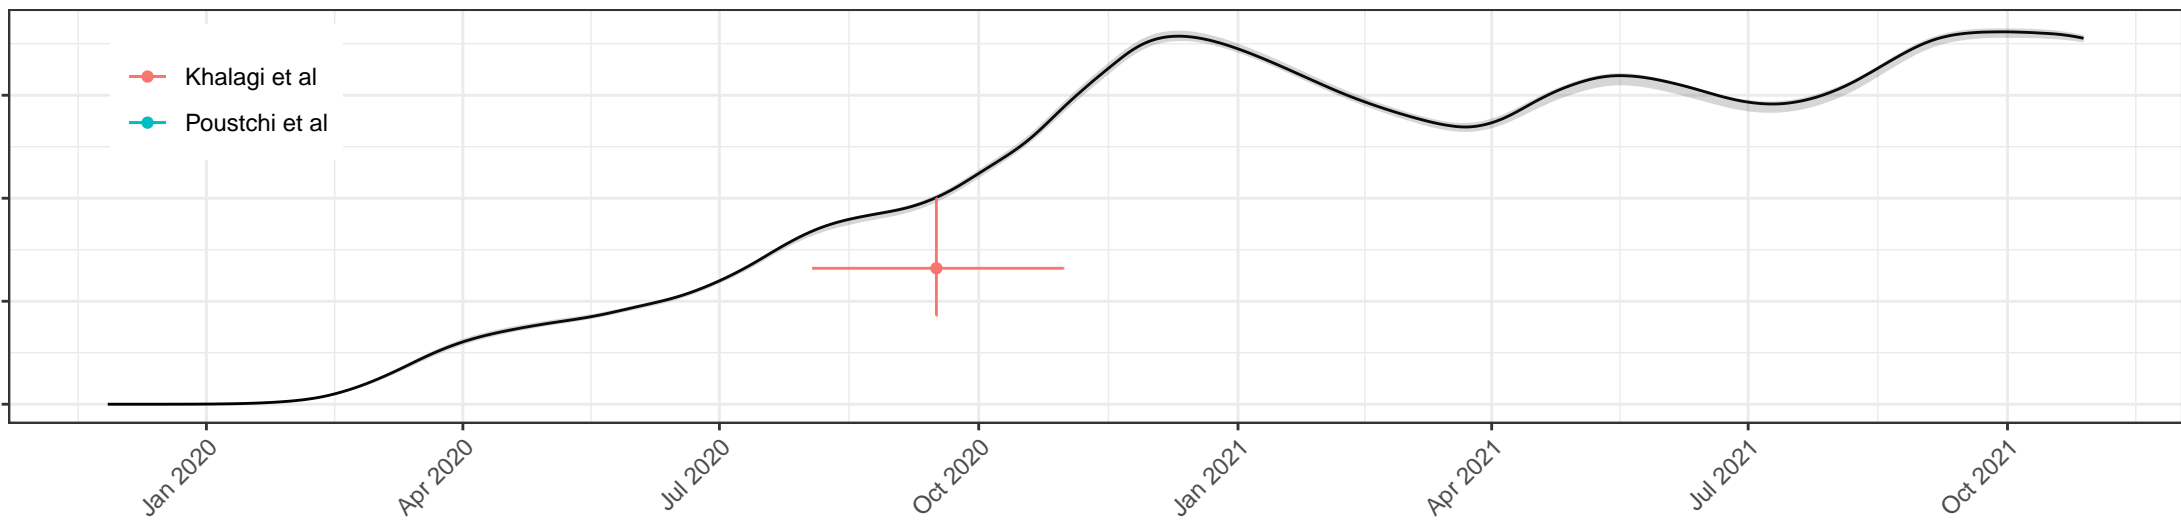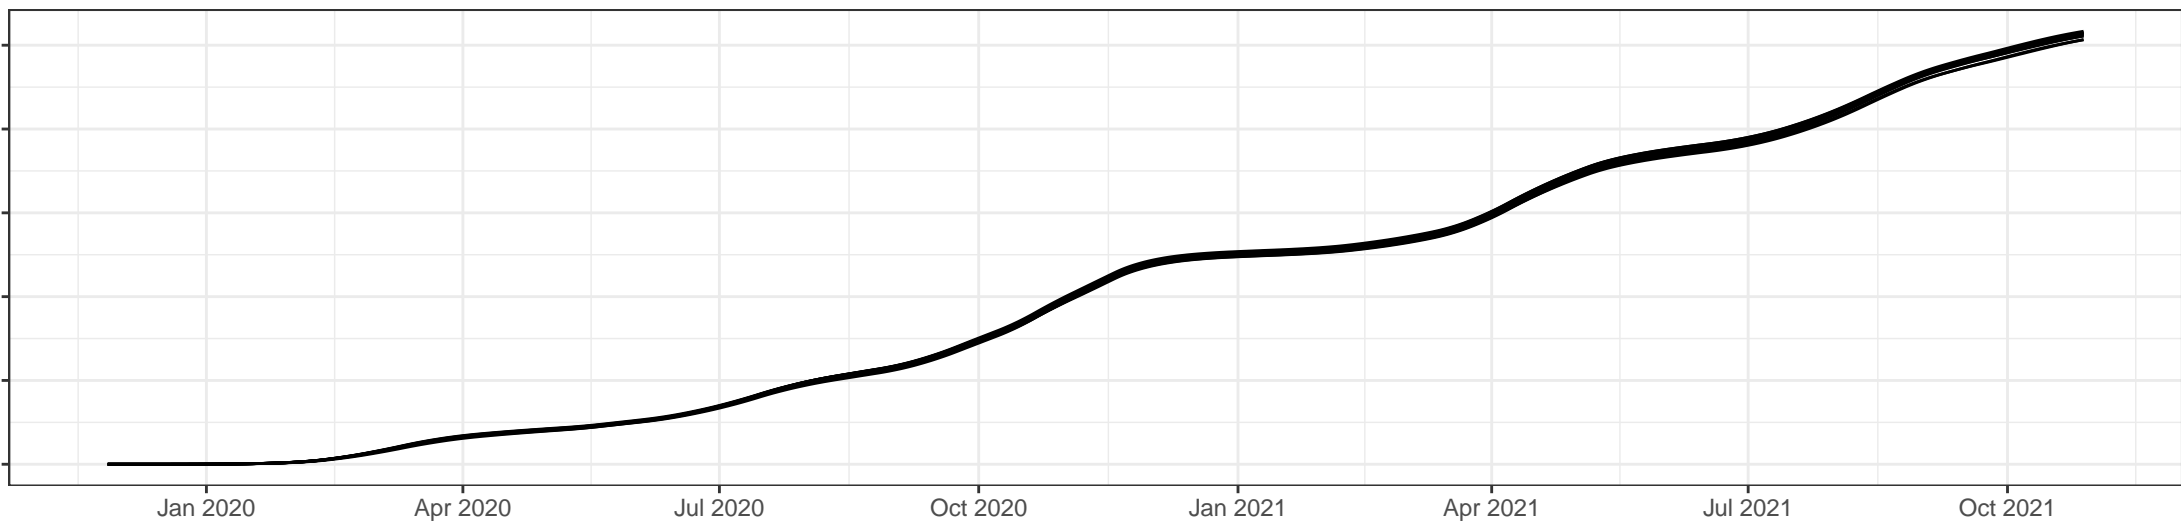

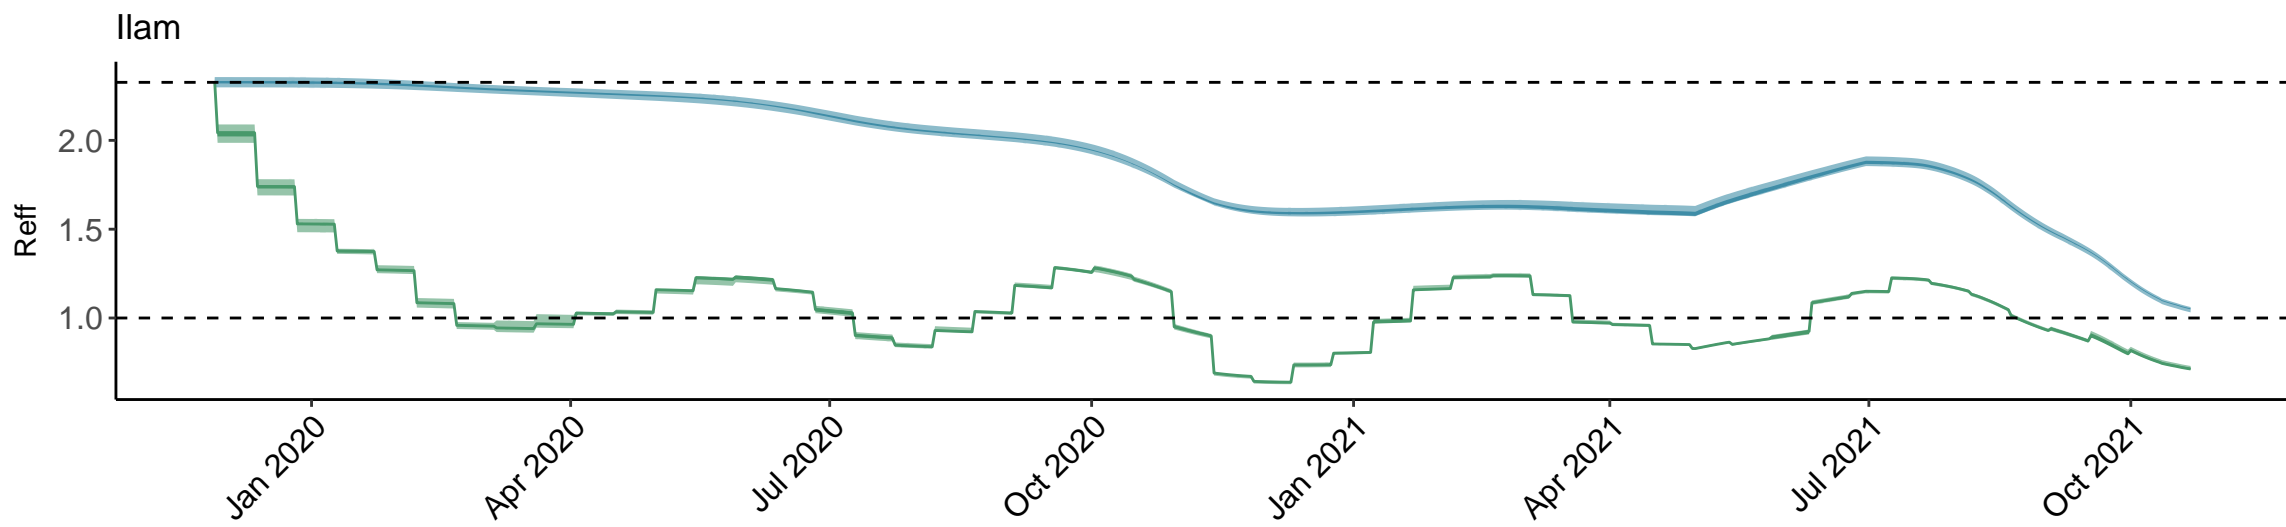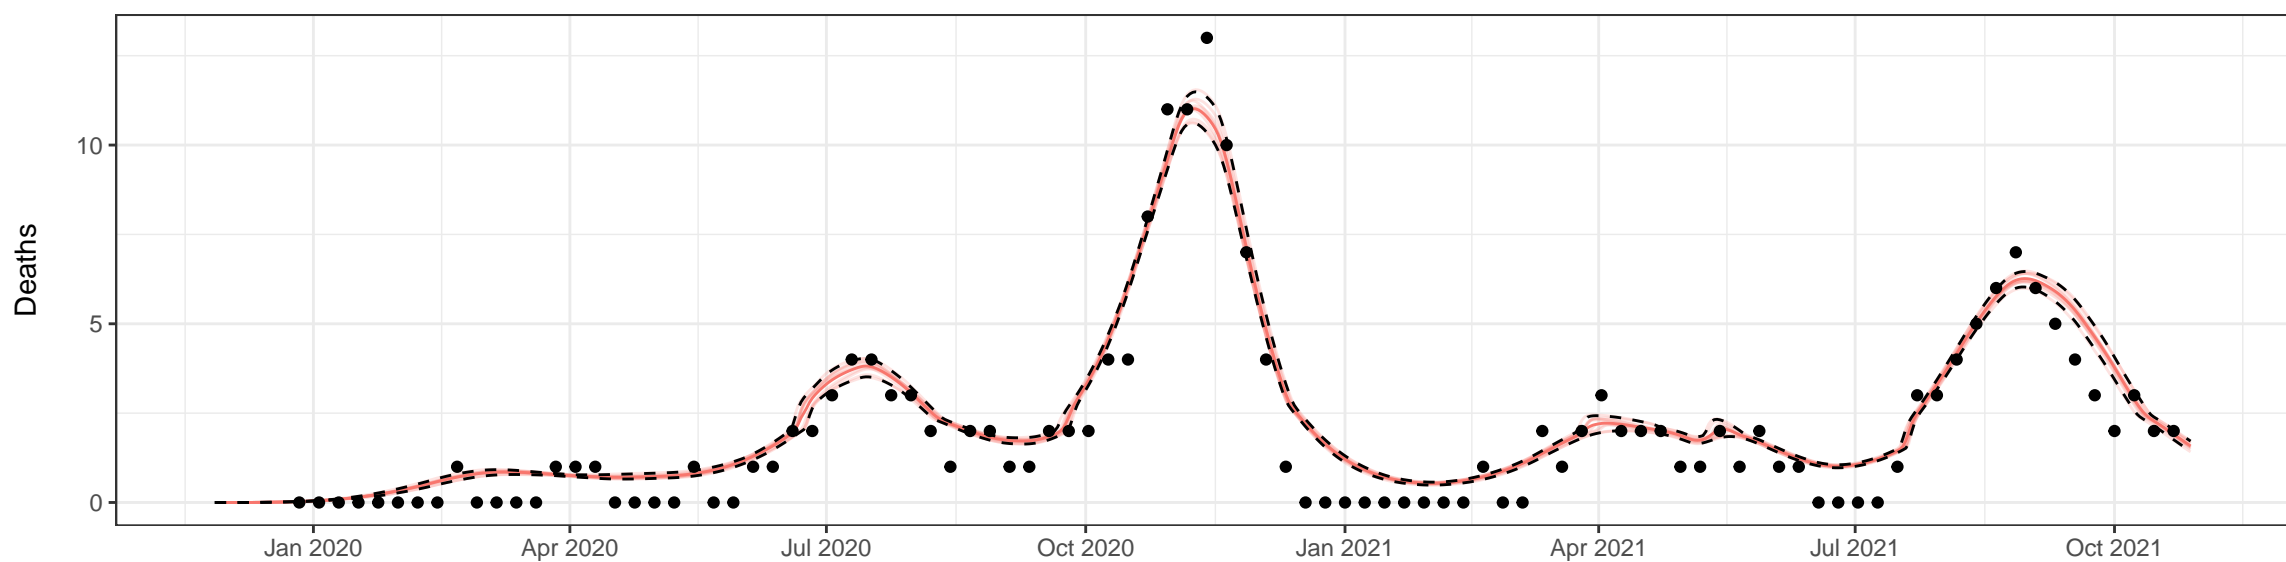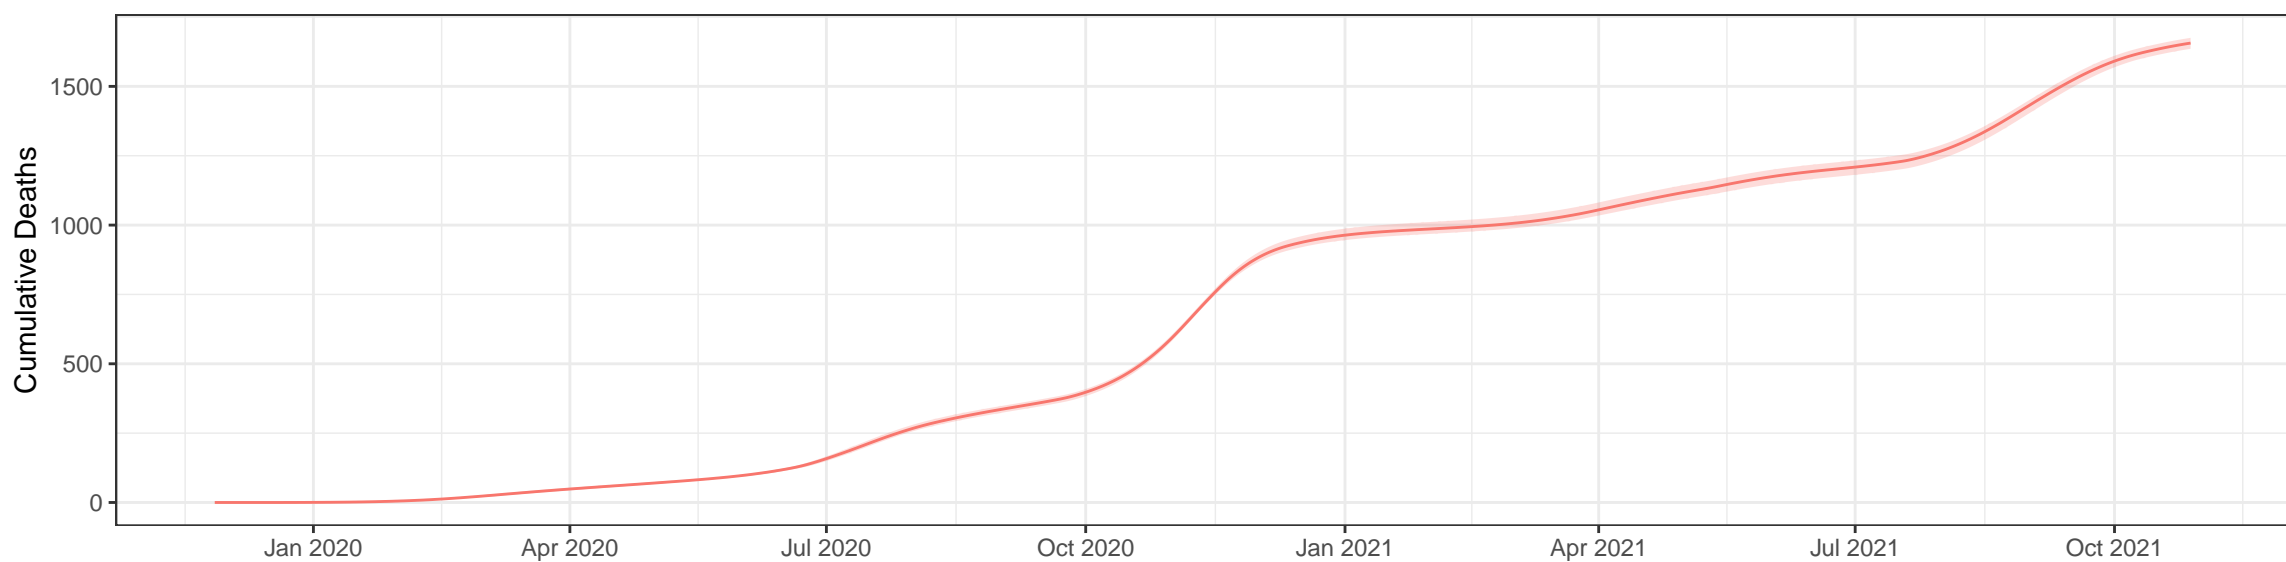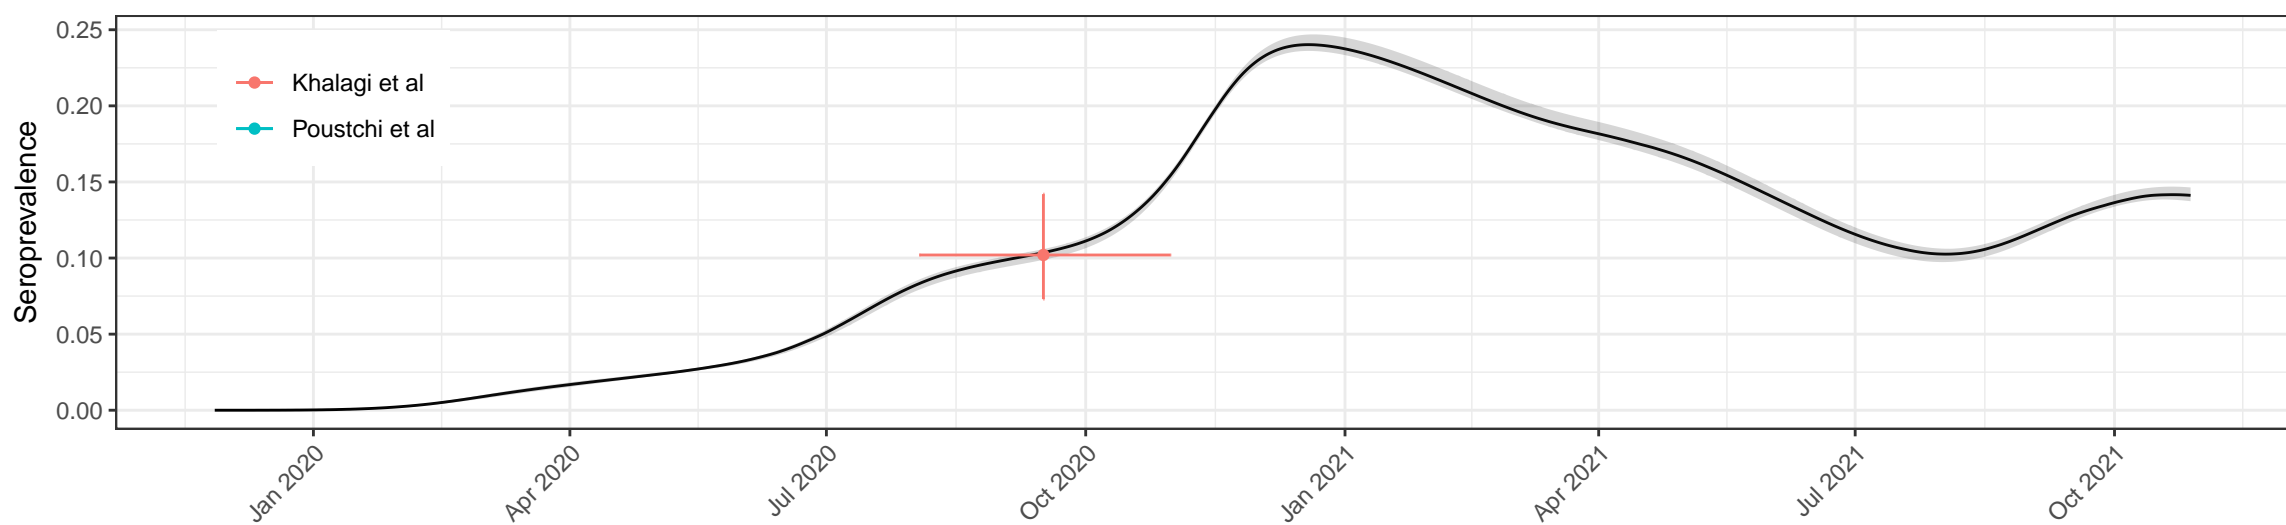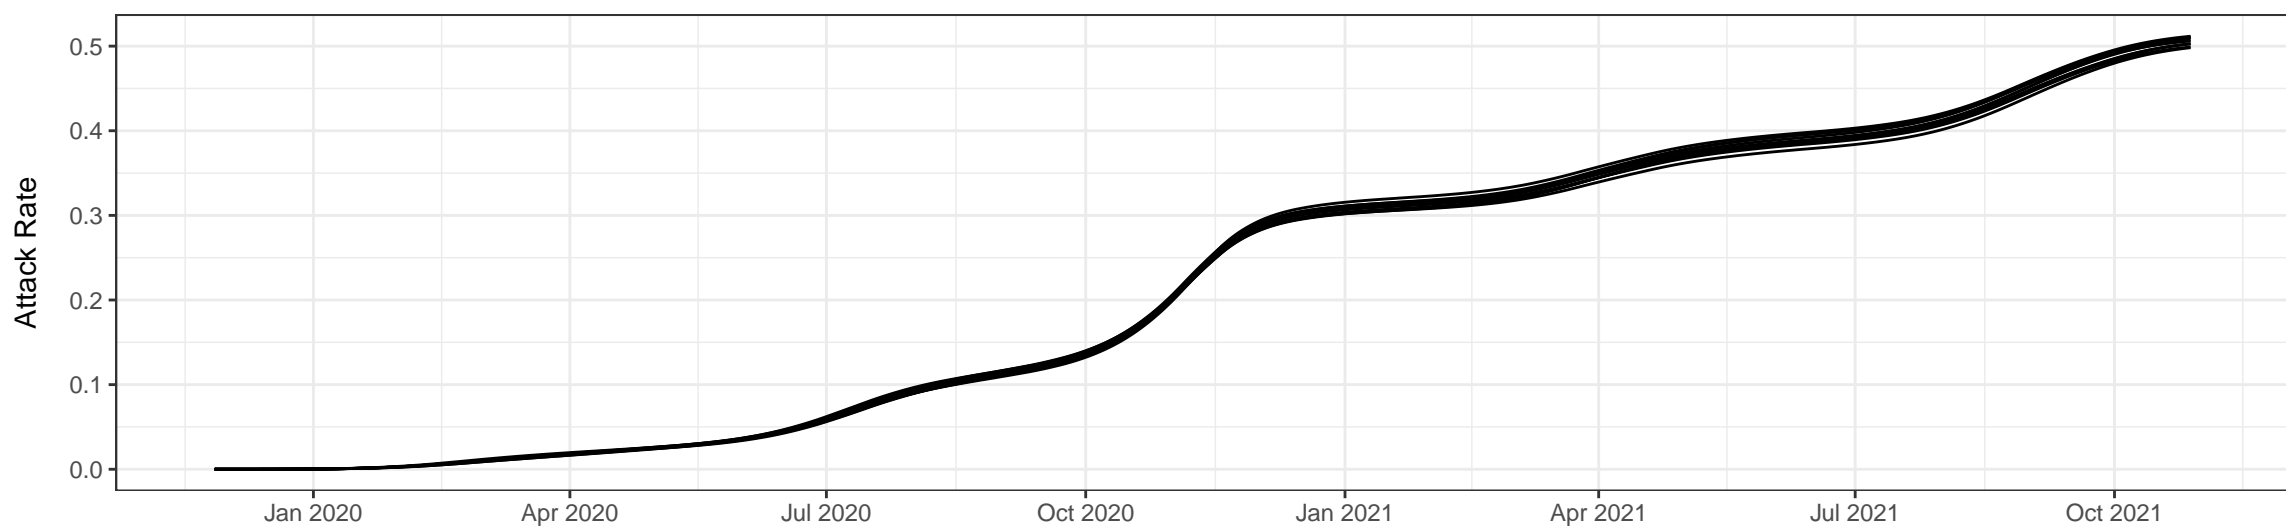

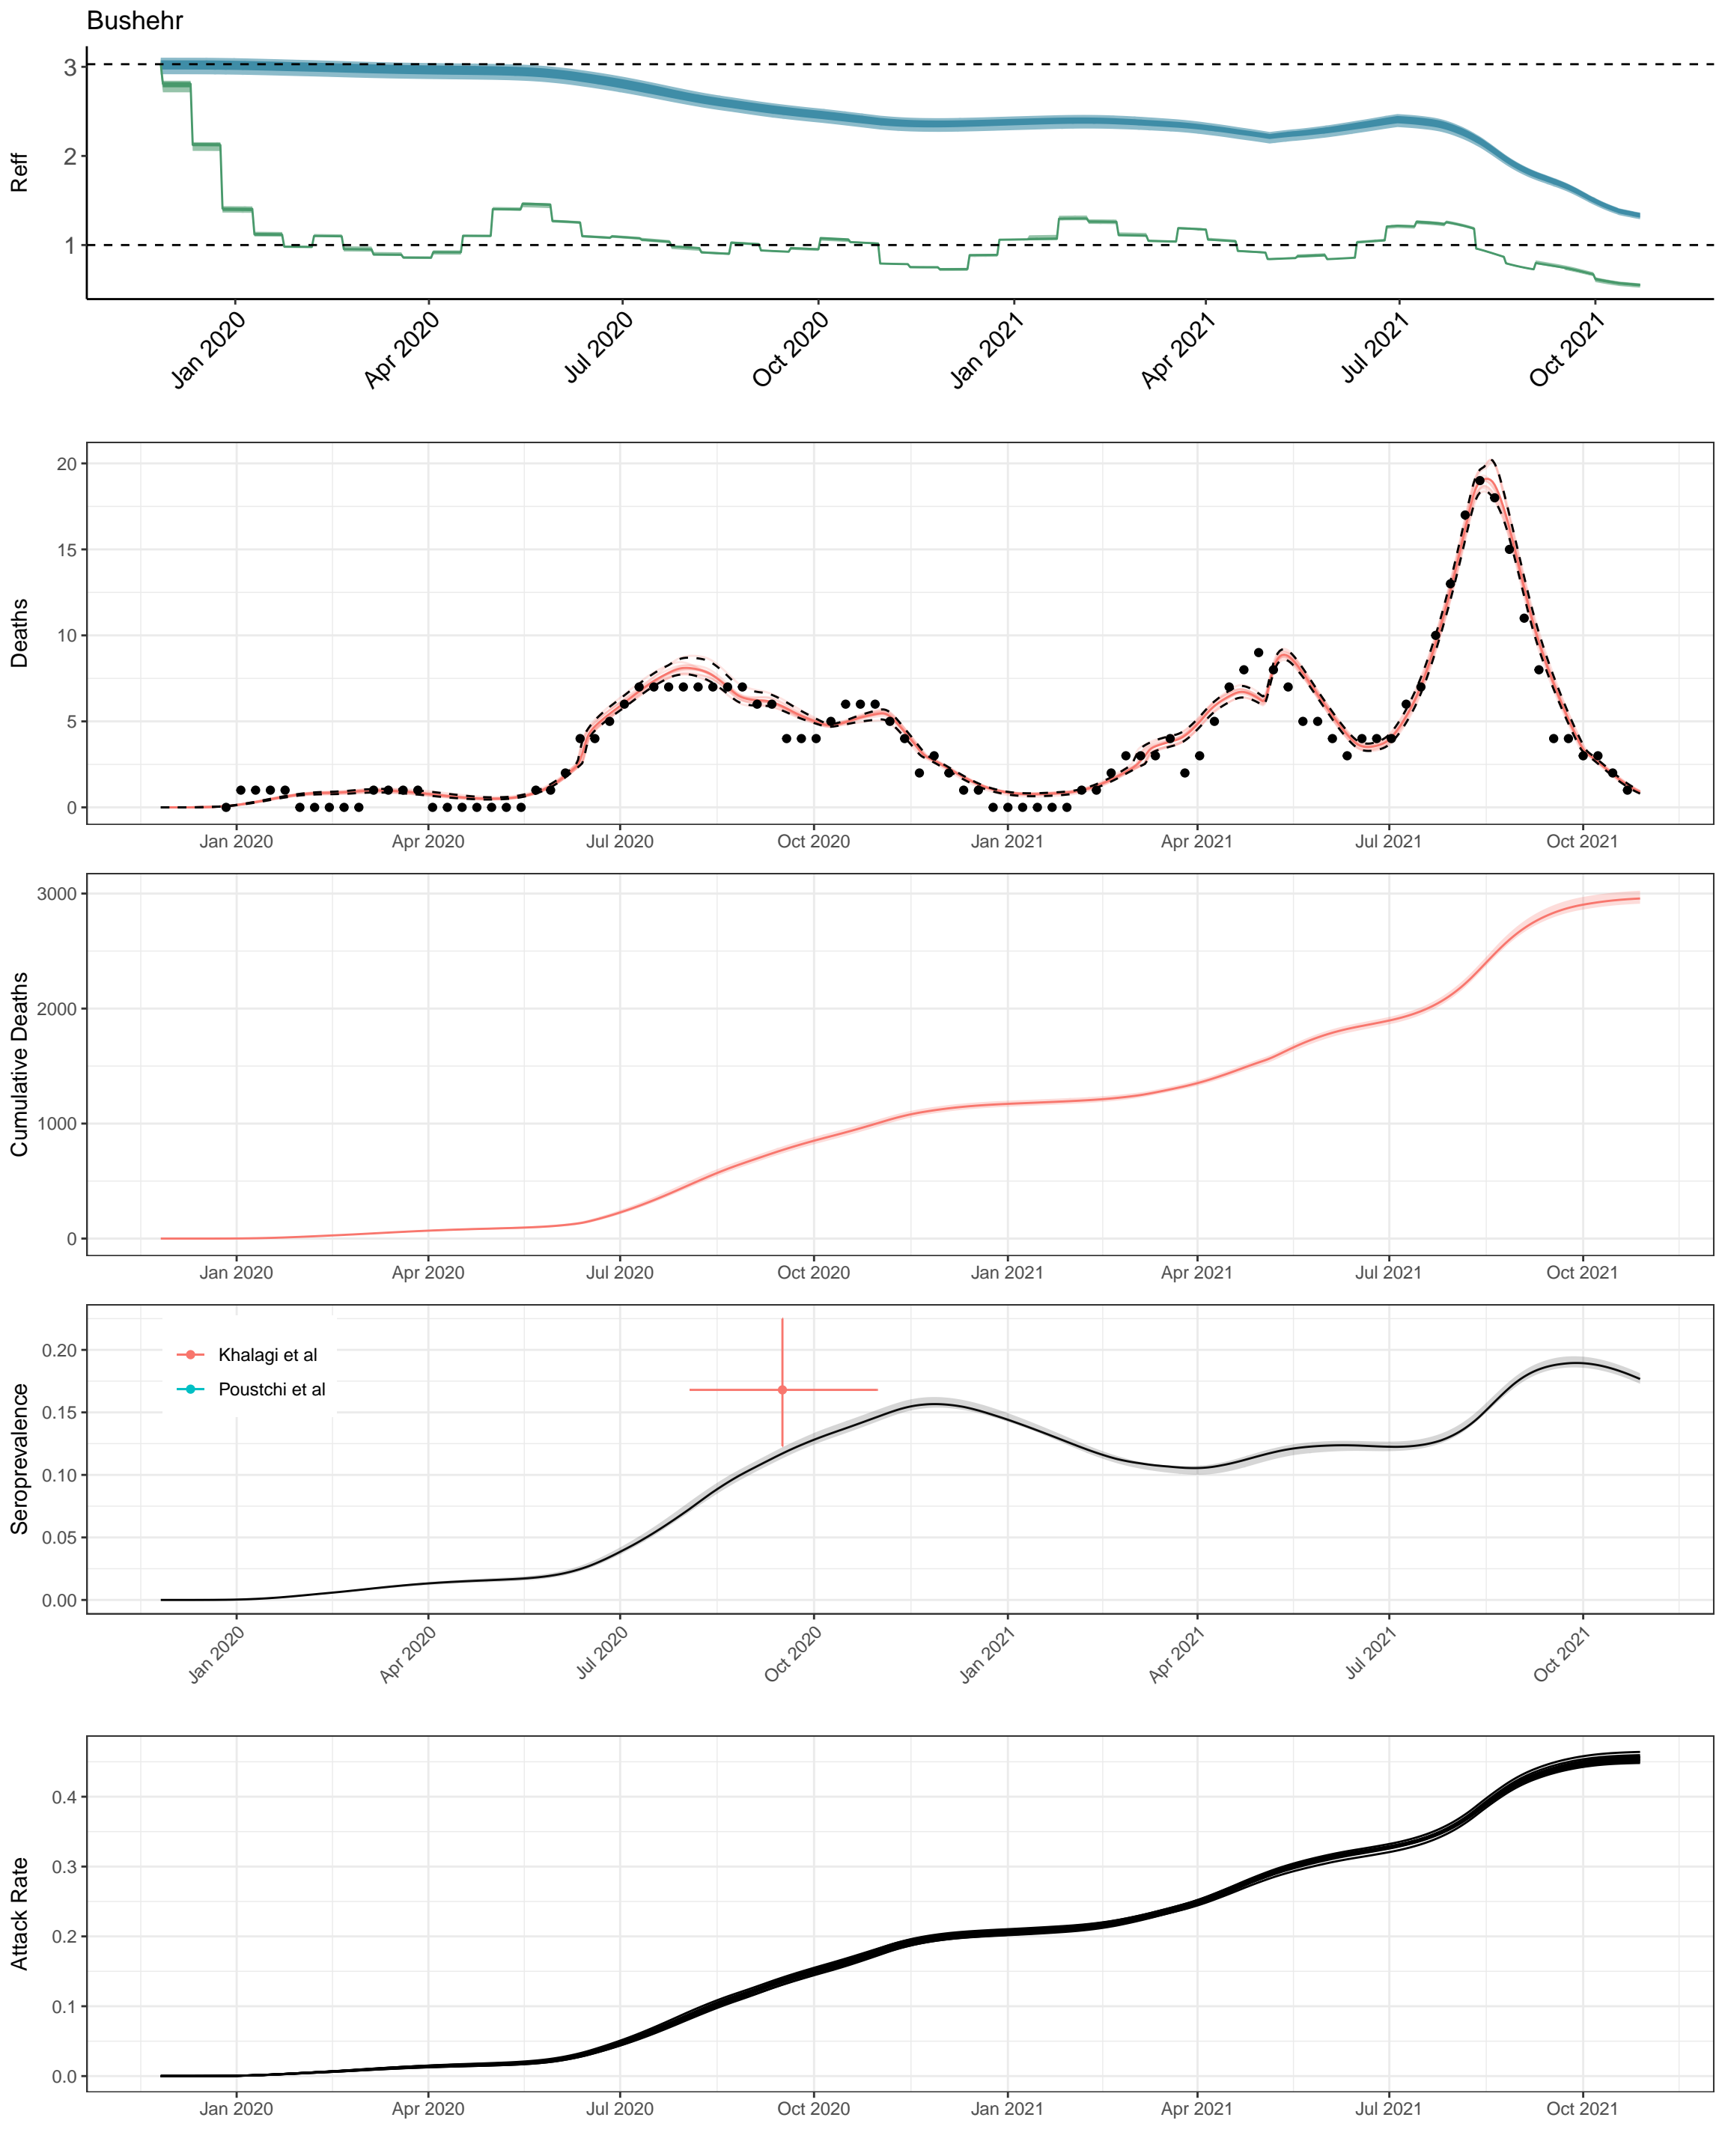

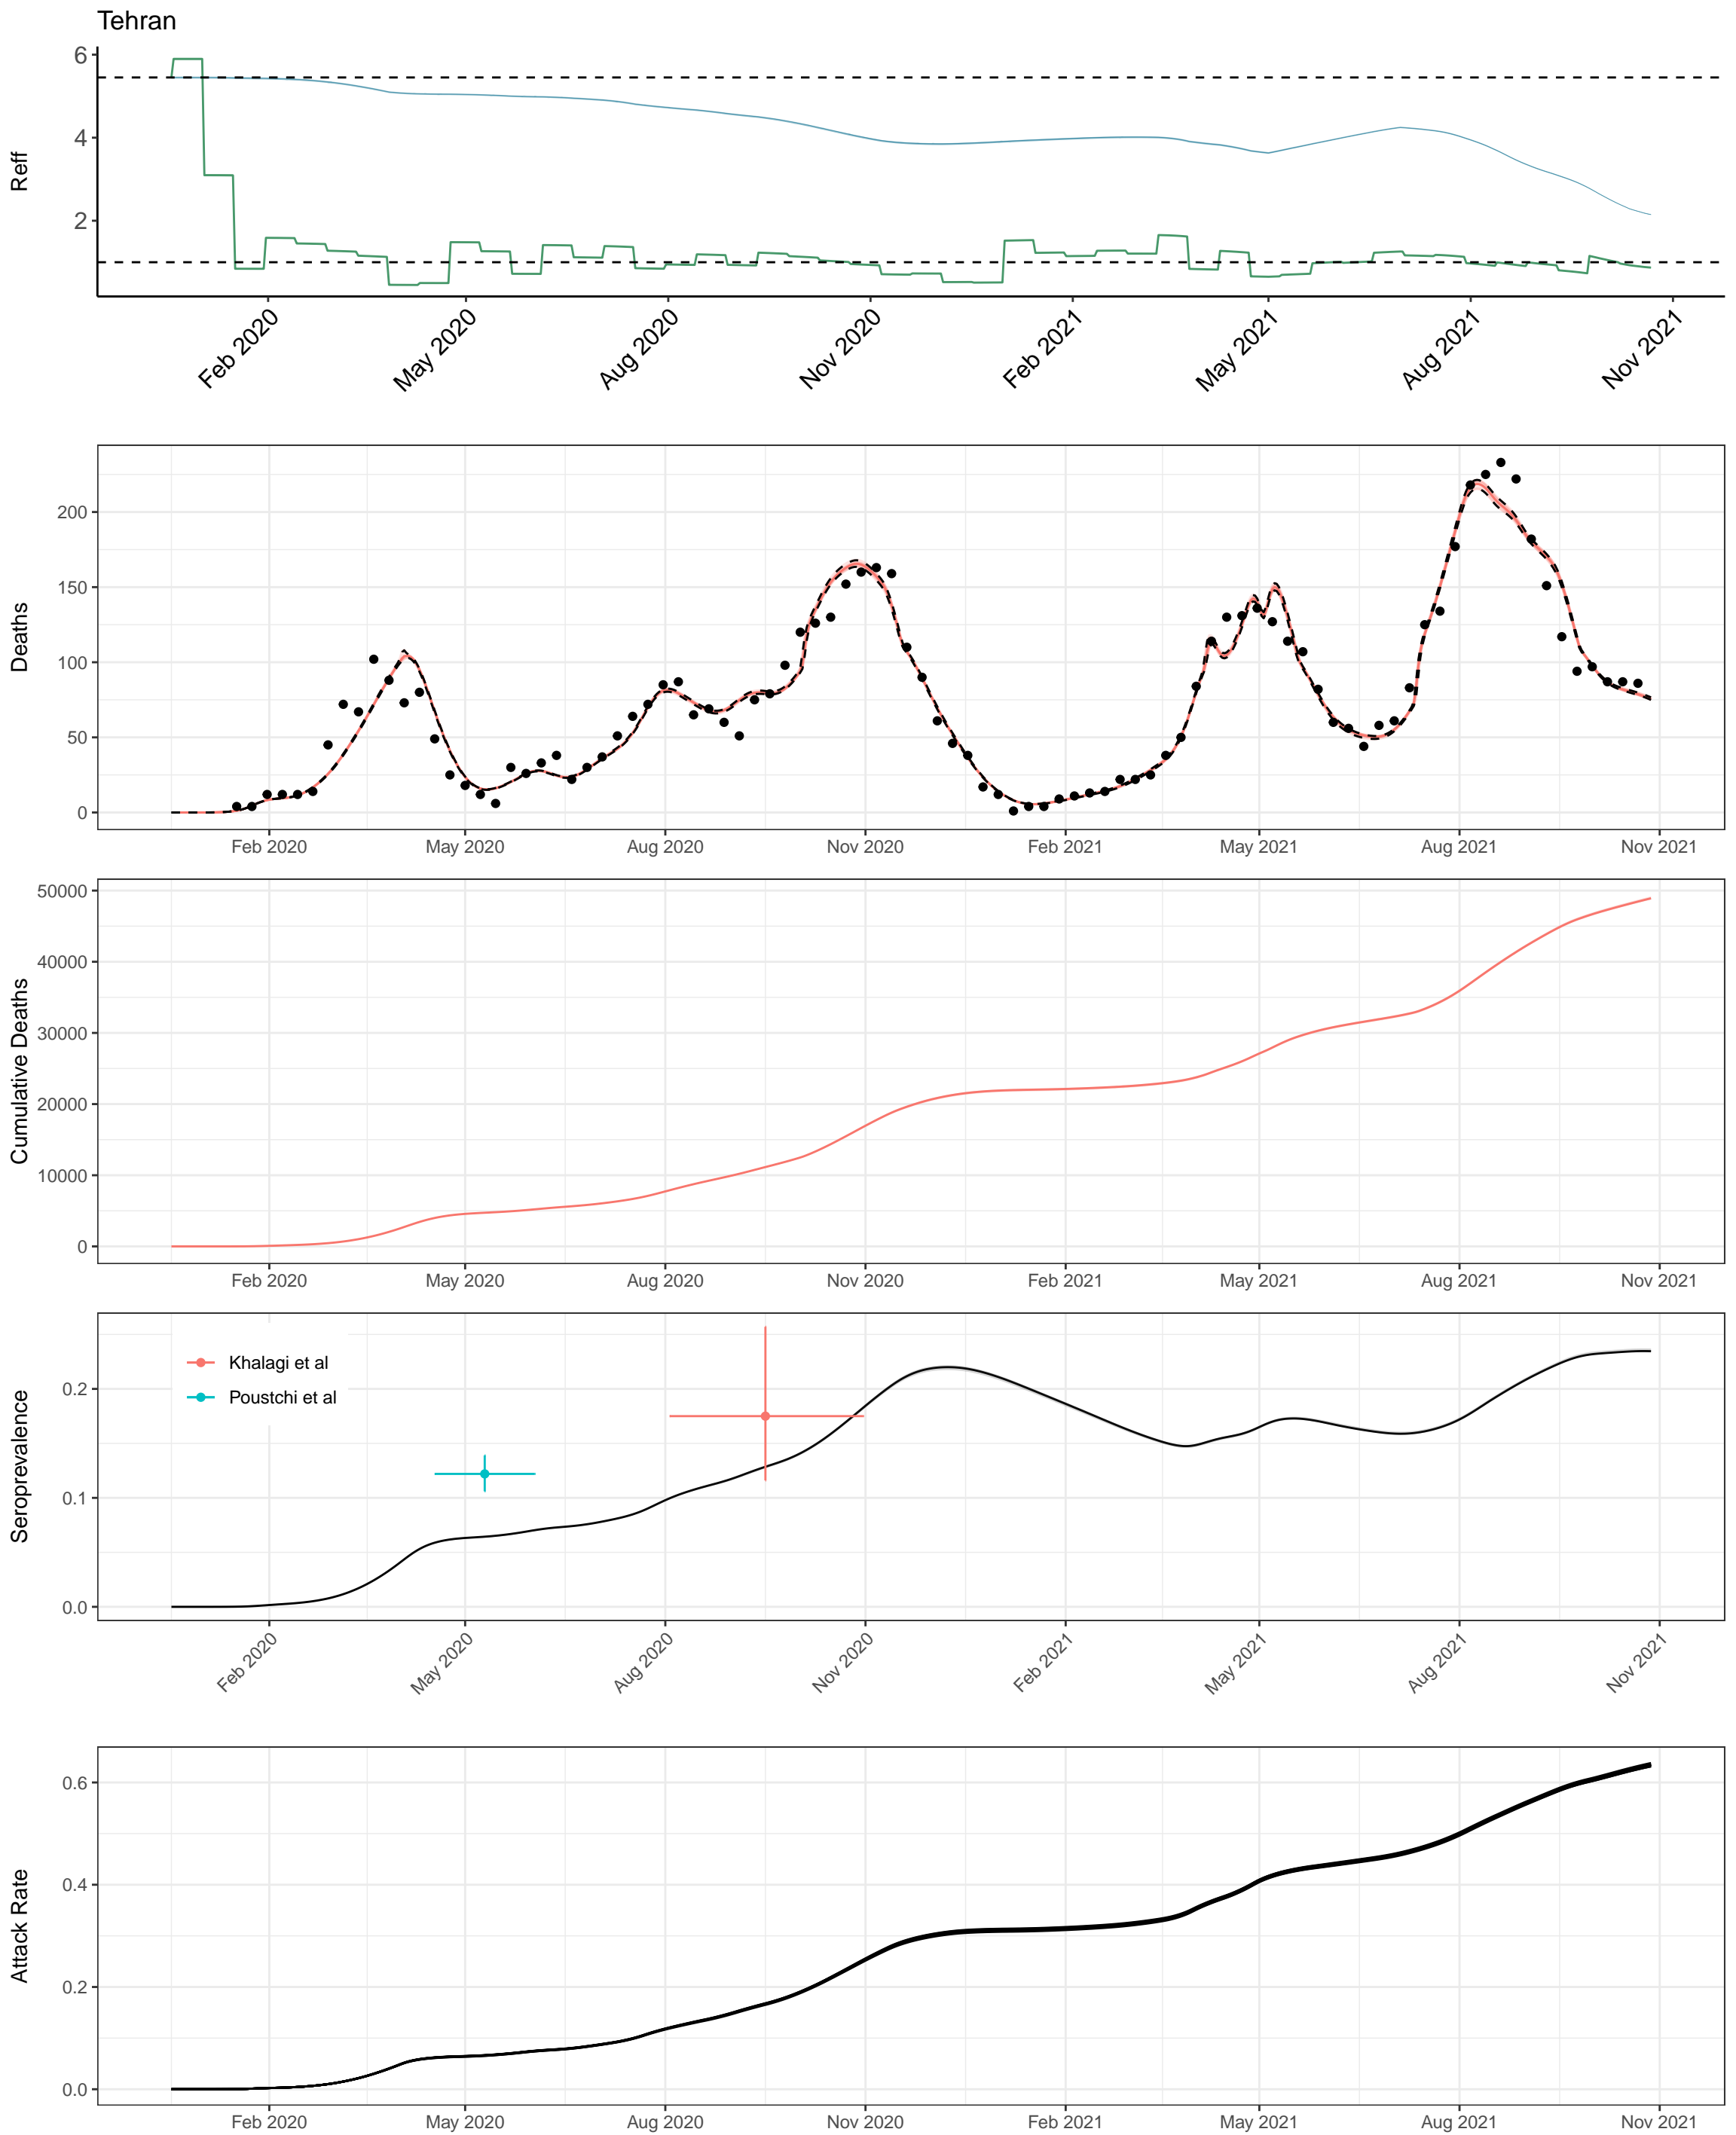



Chahar Mahaal and Bakhtiari

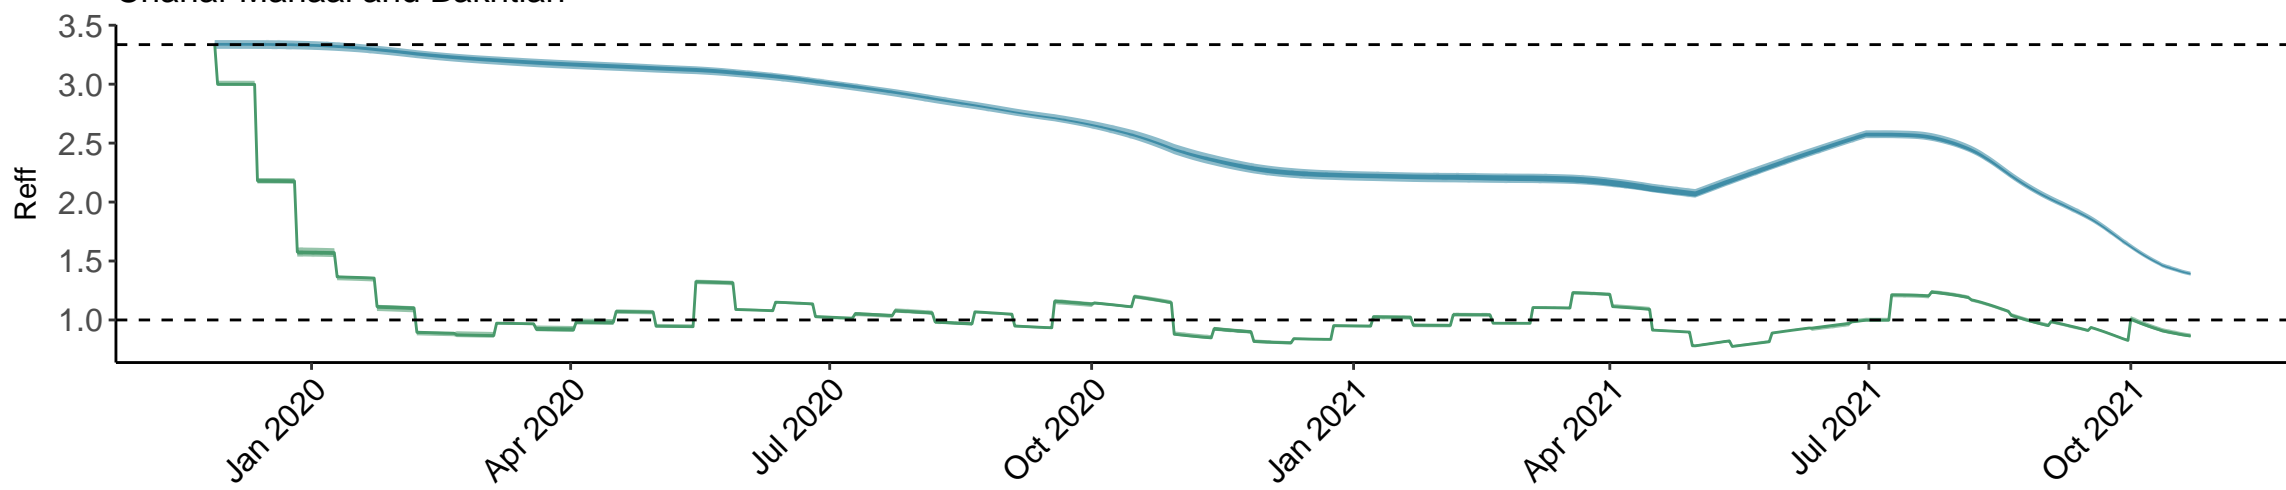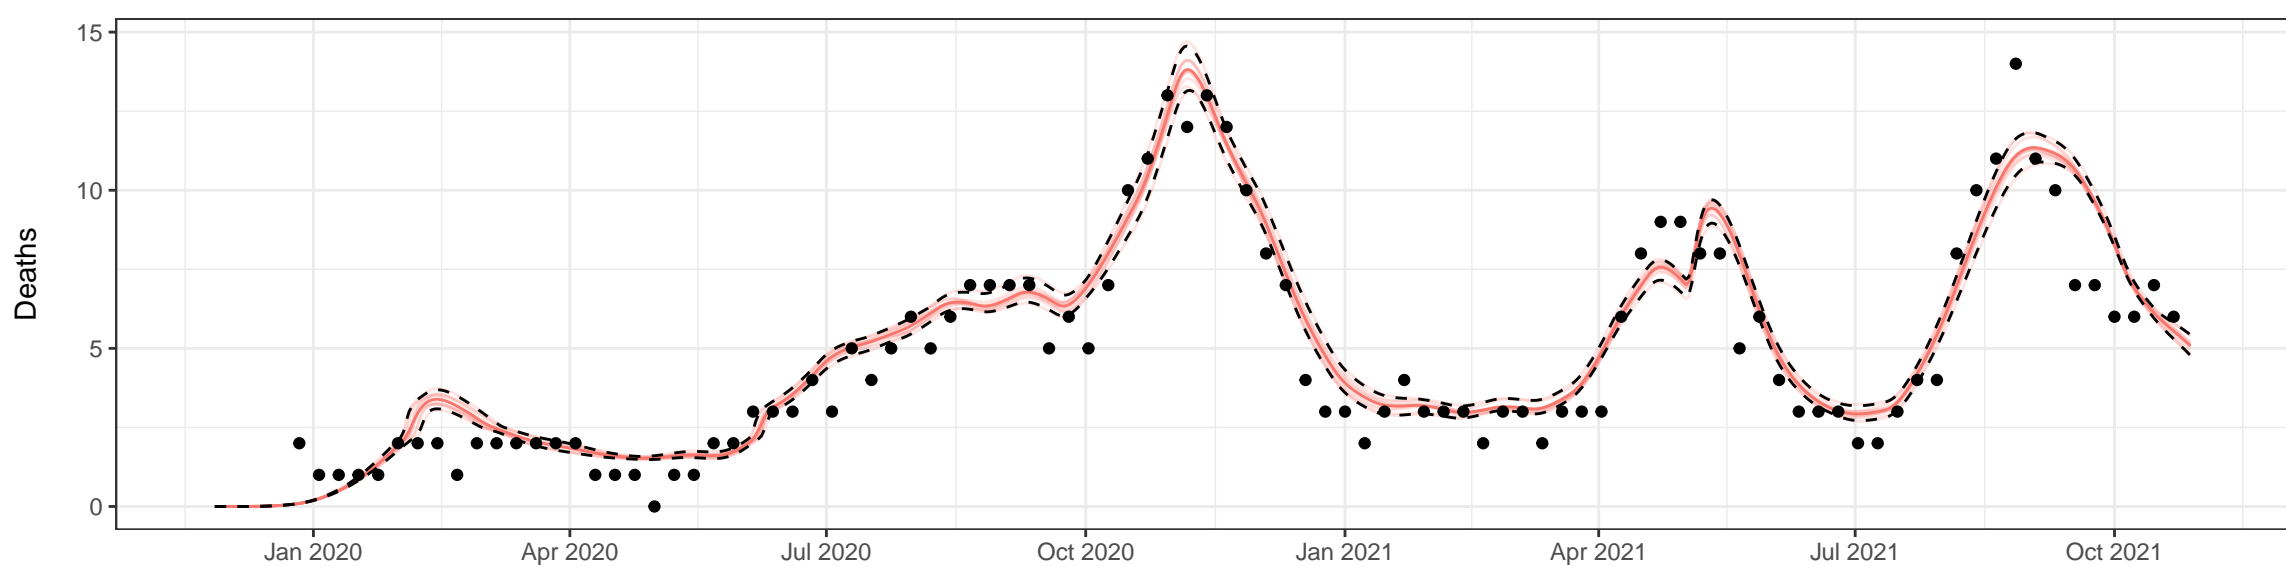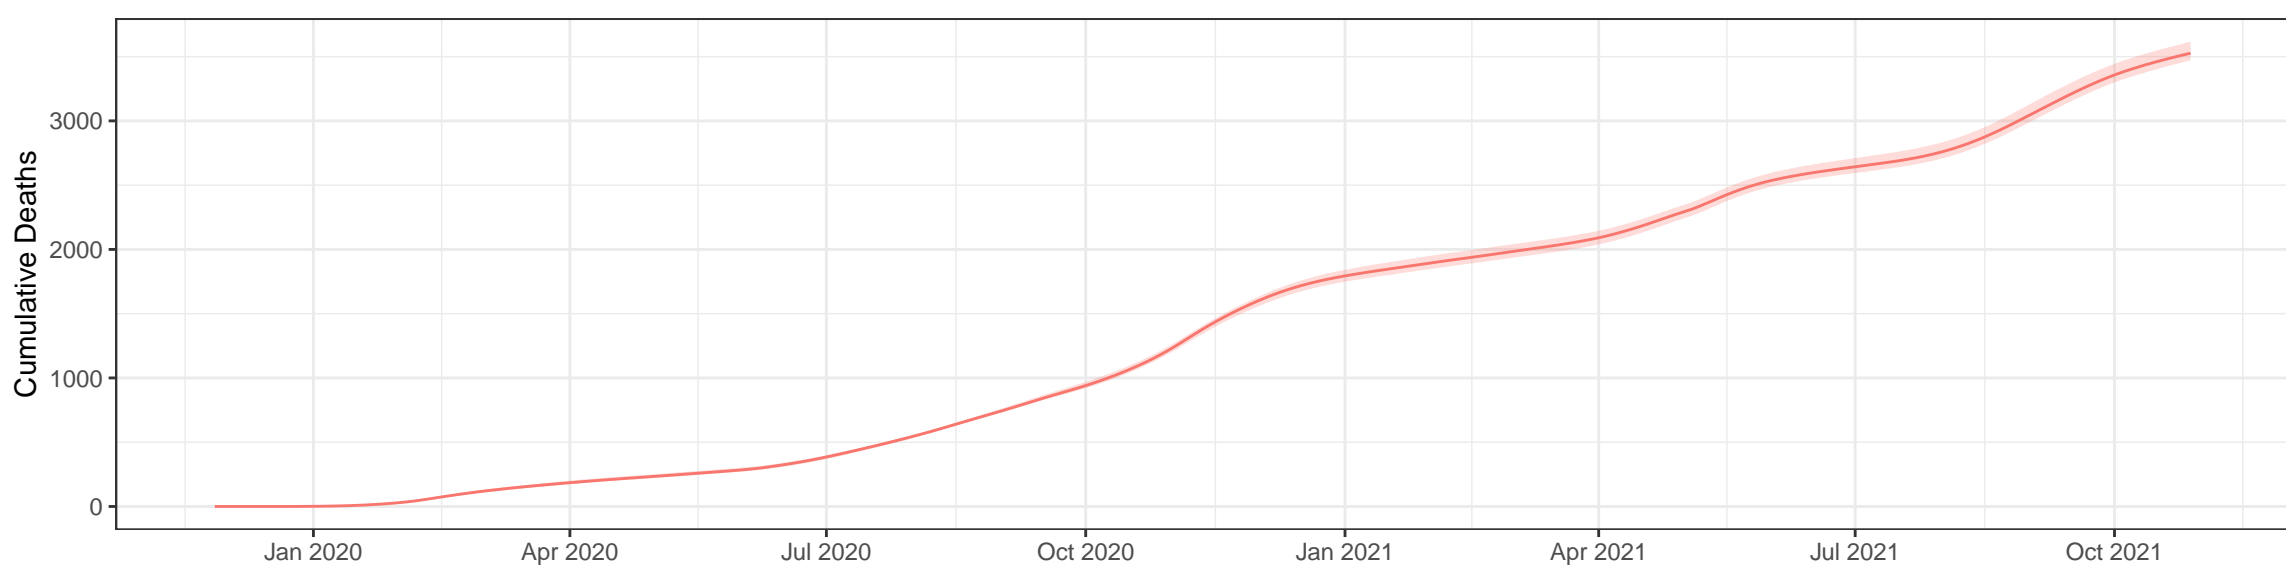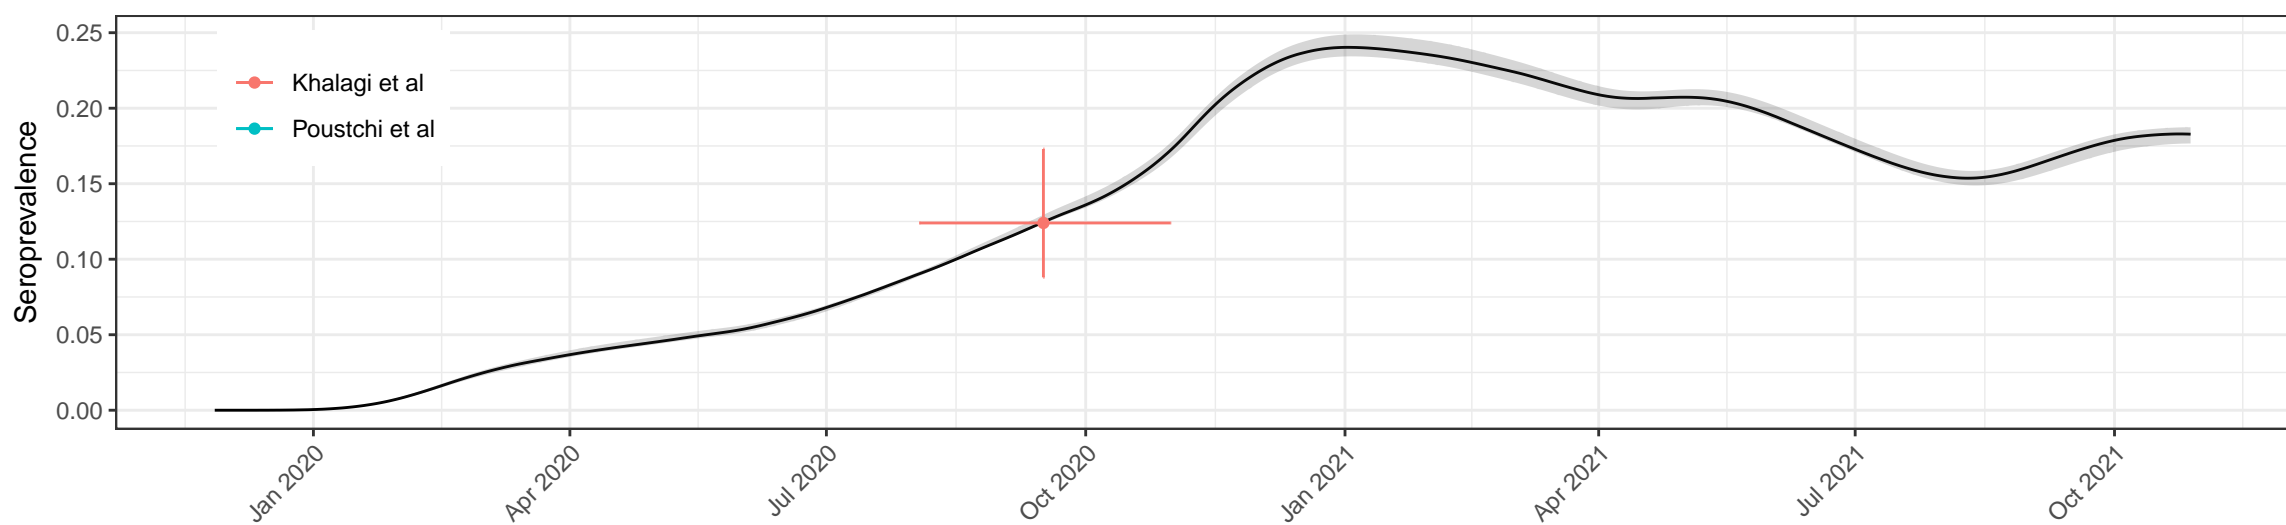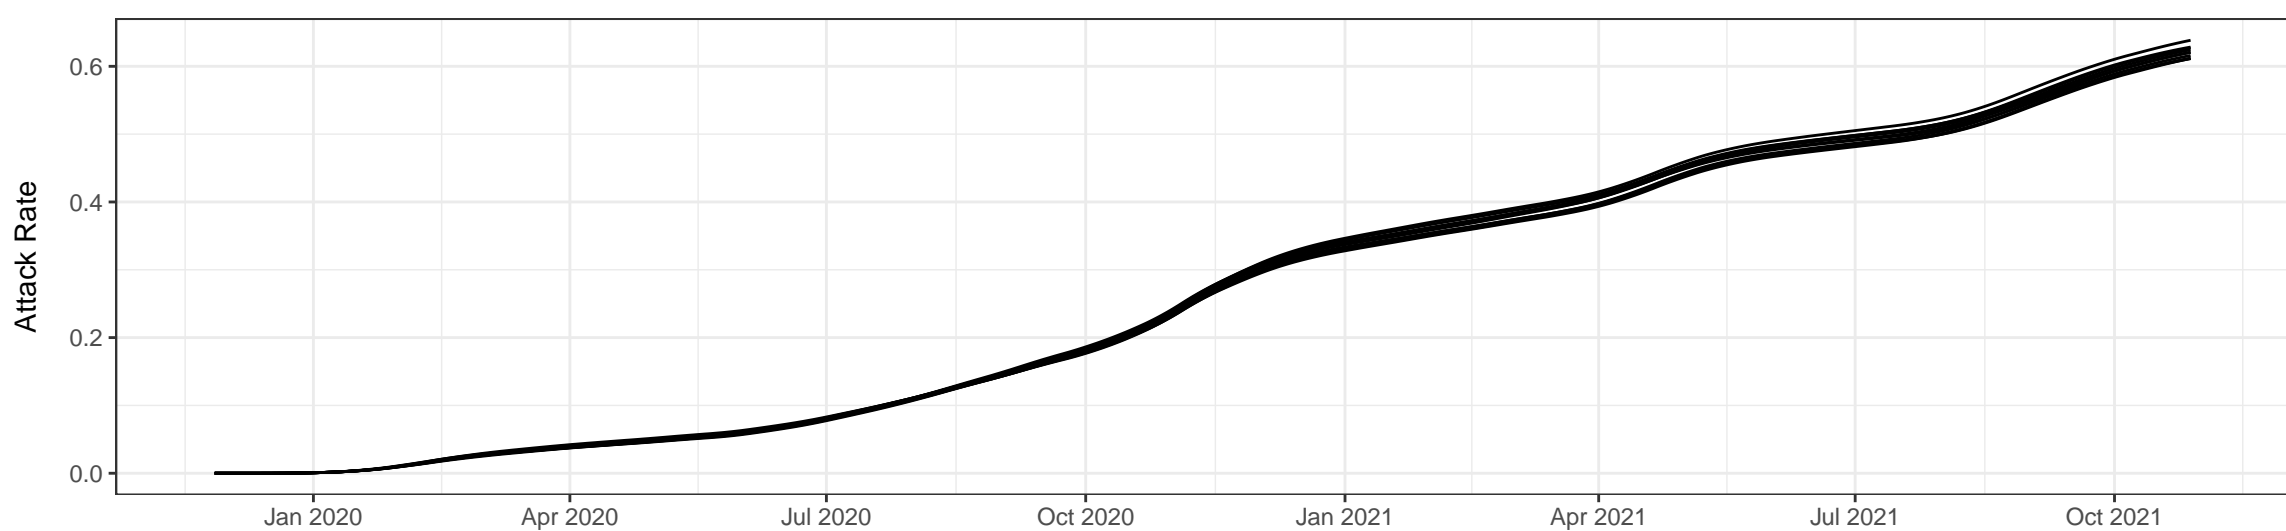

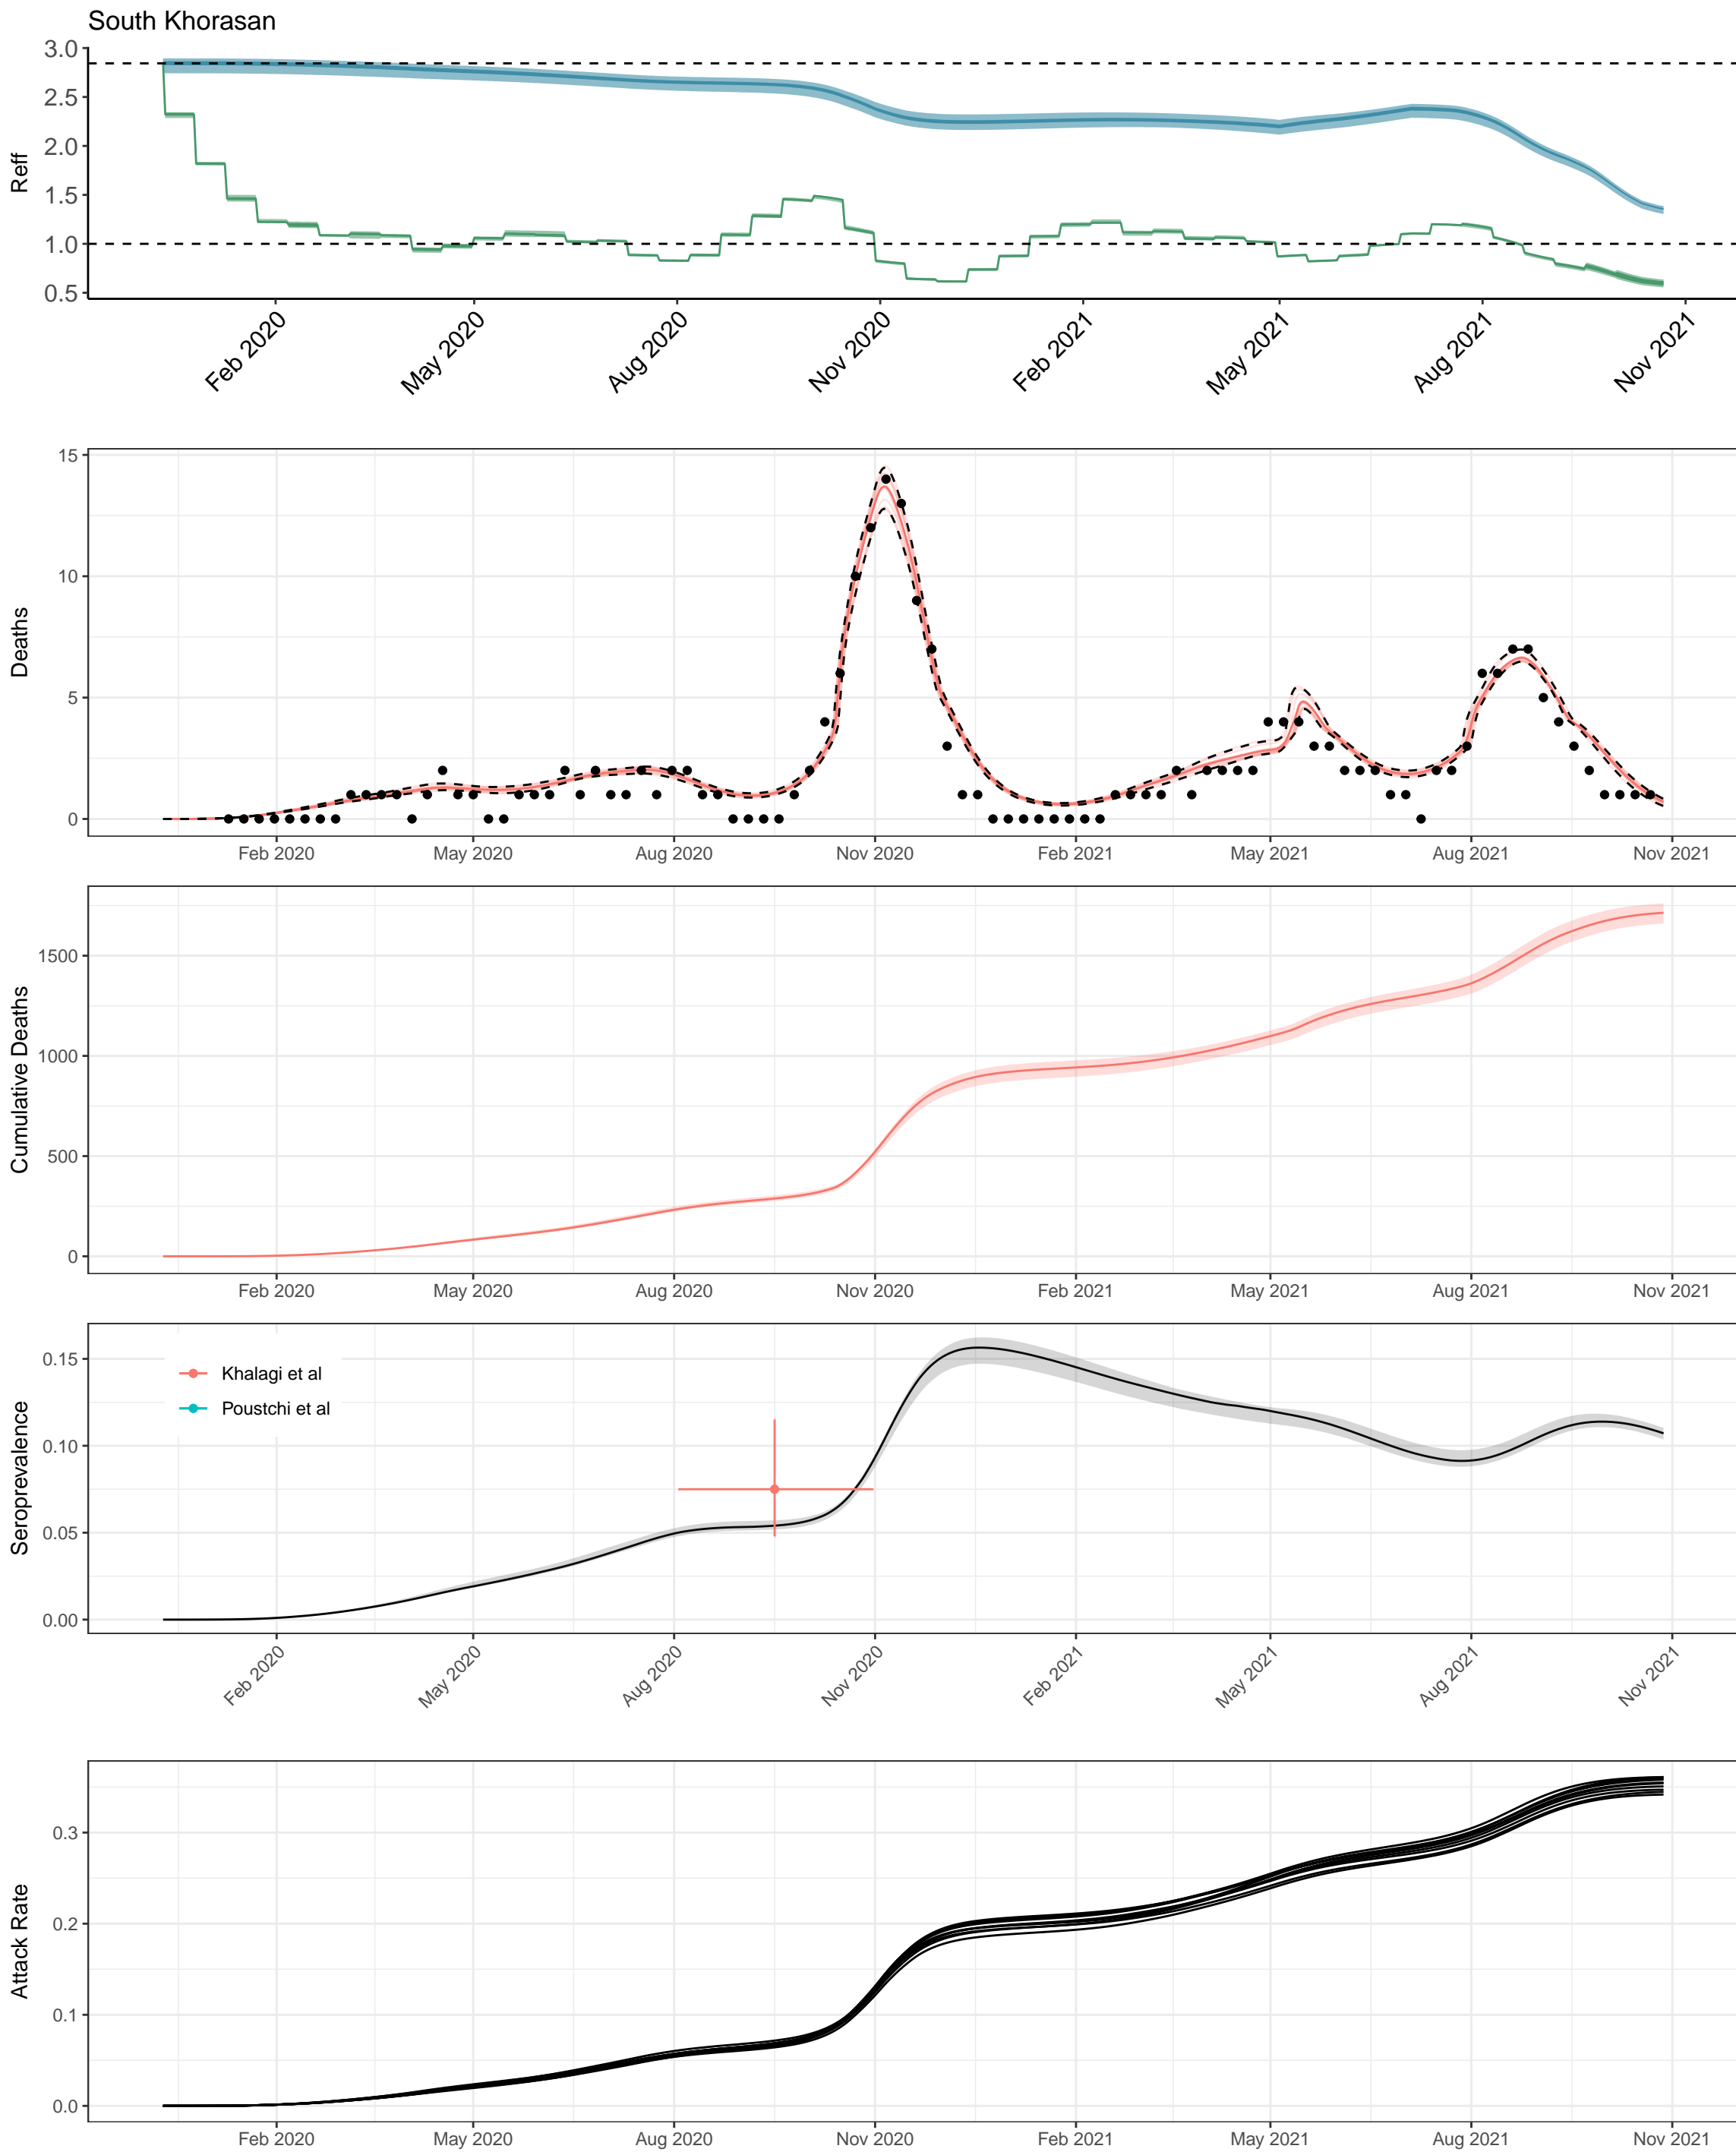

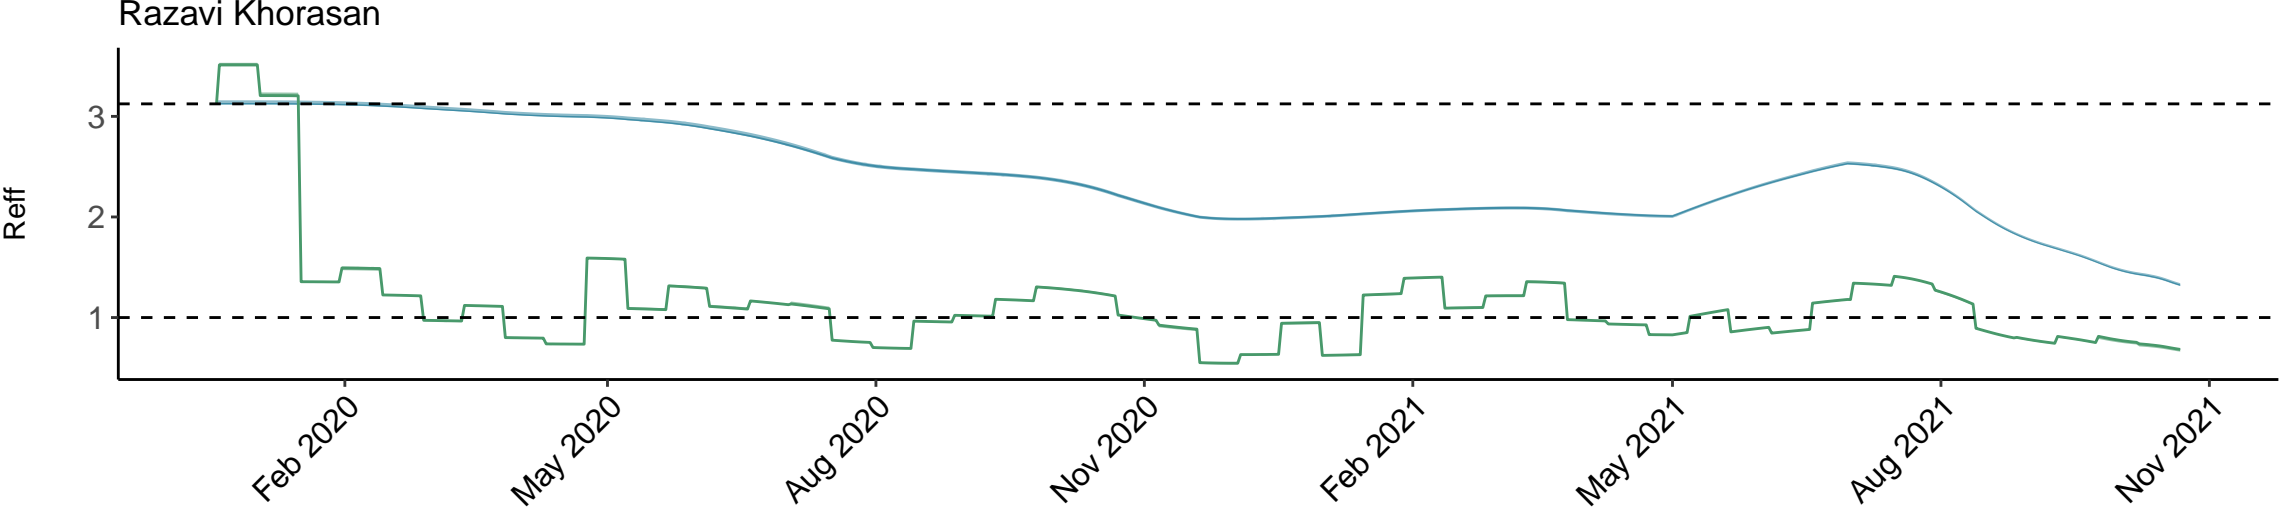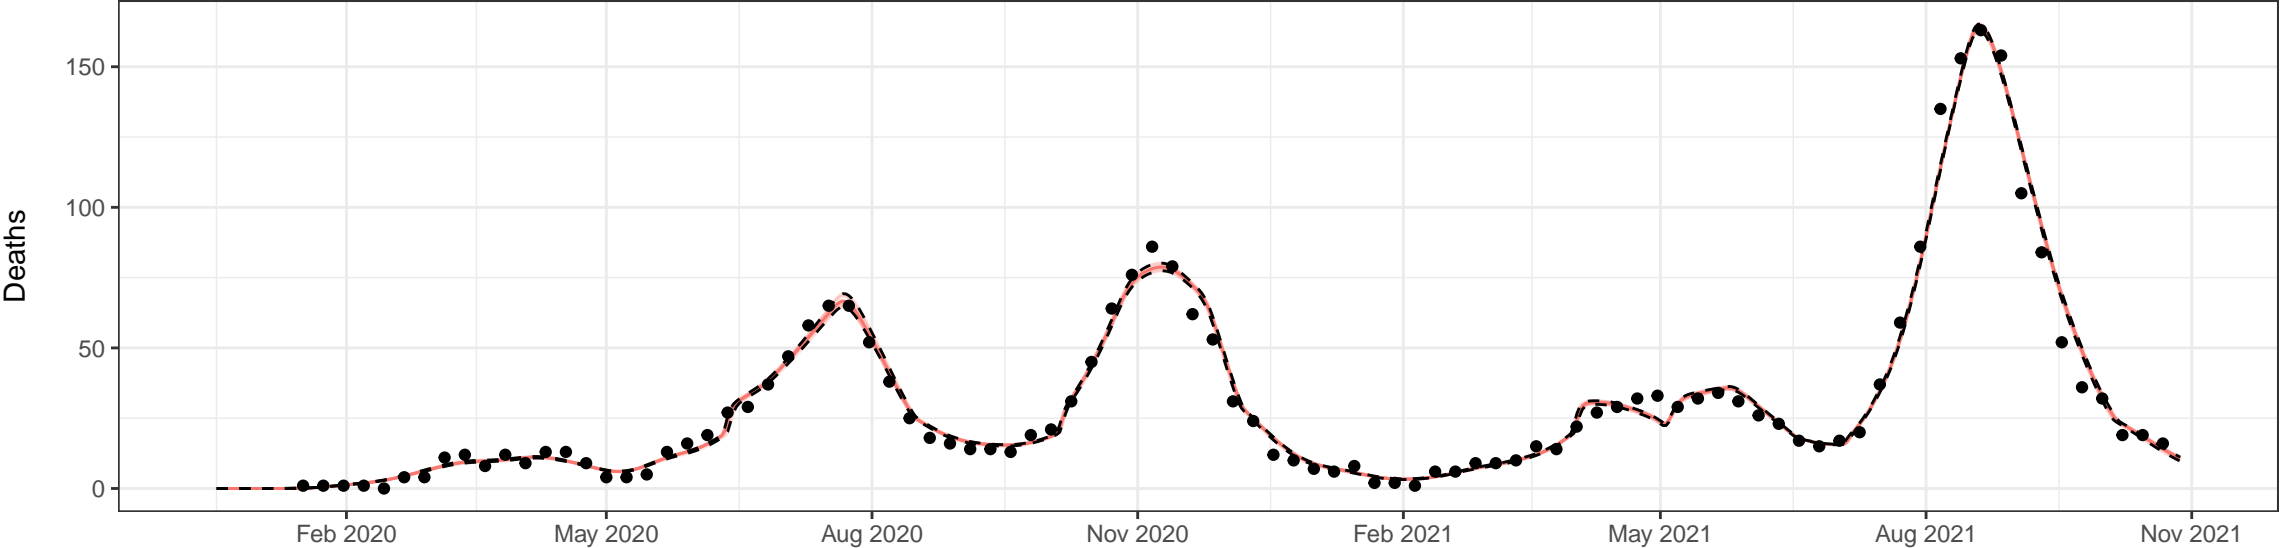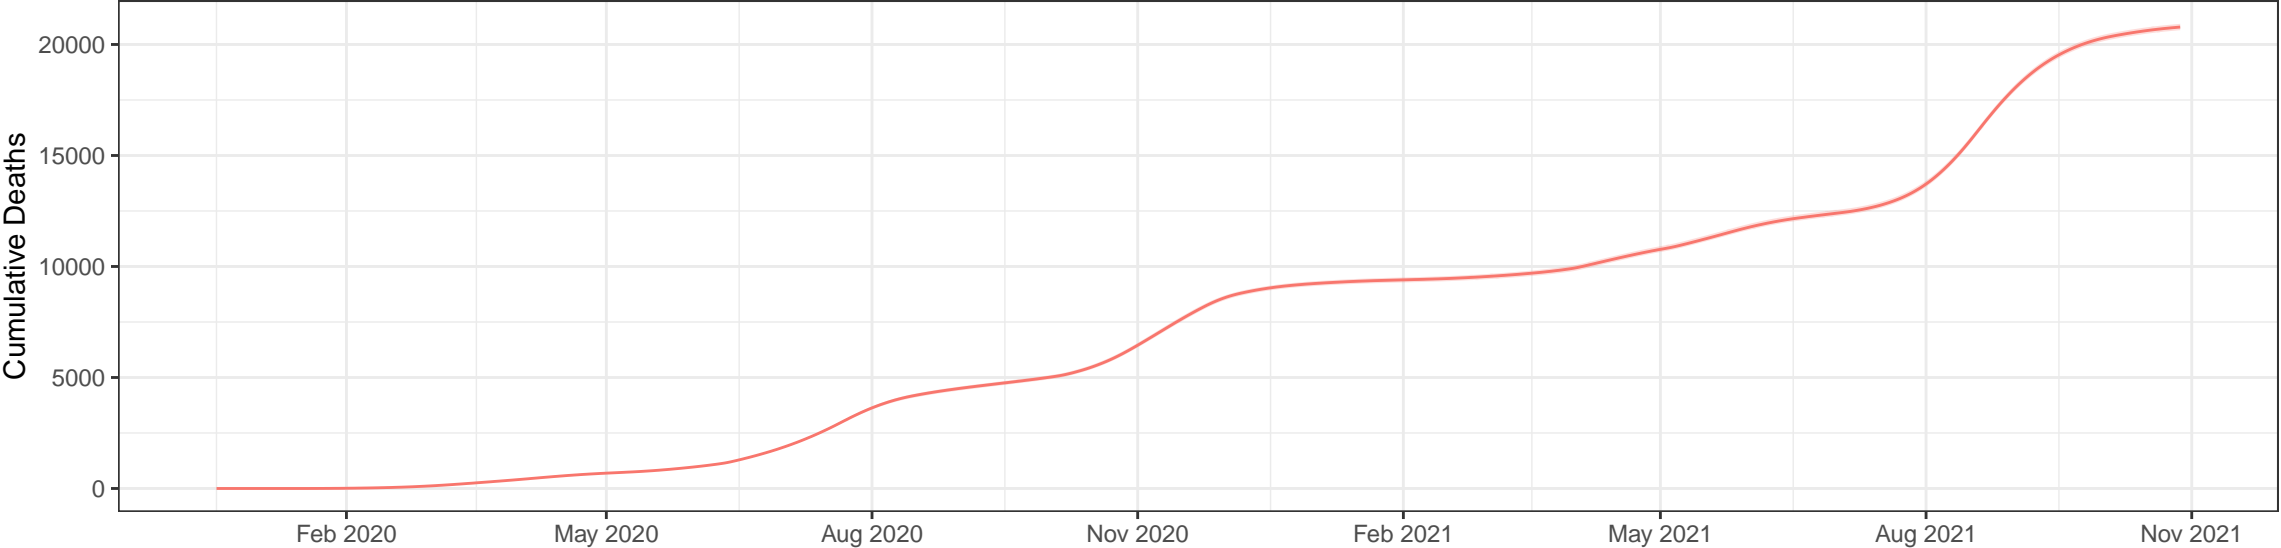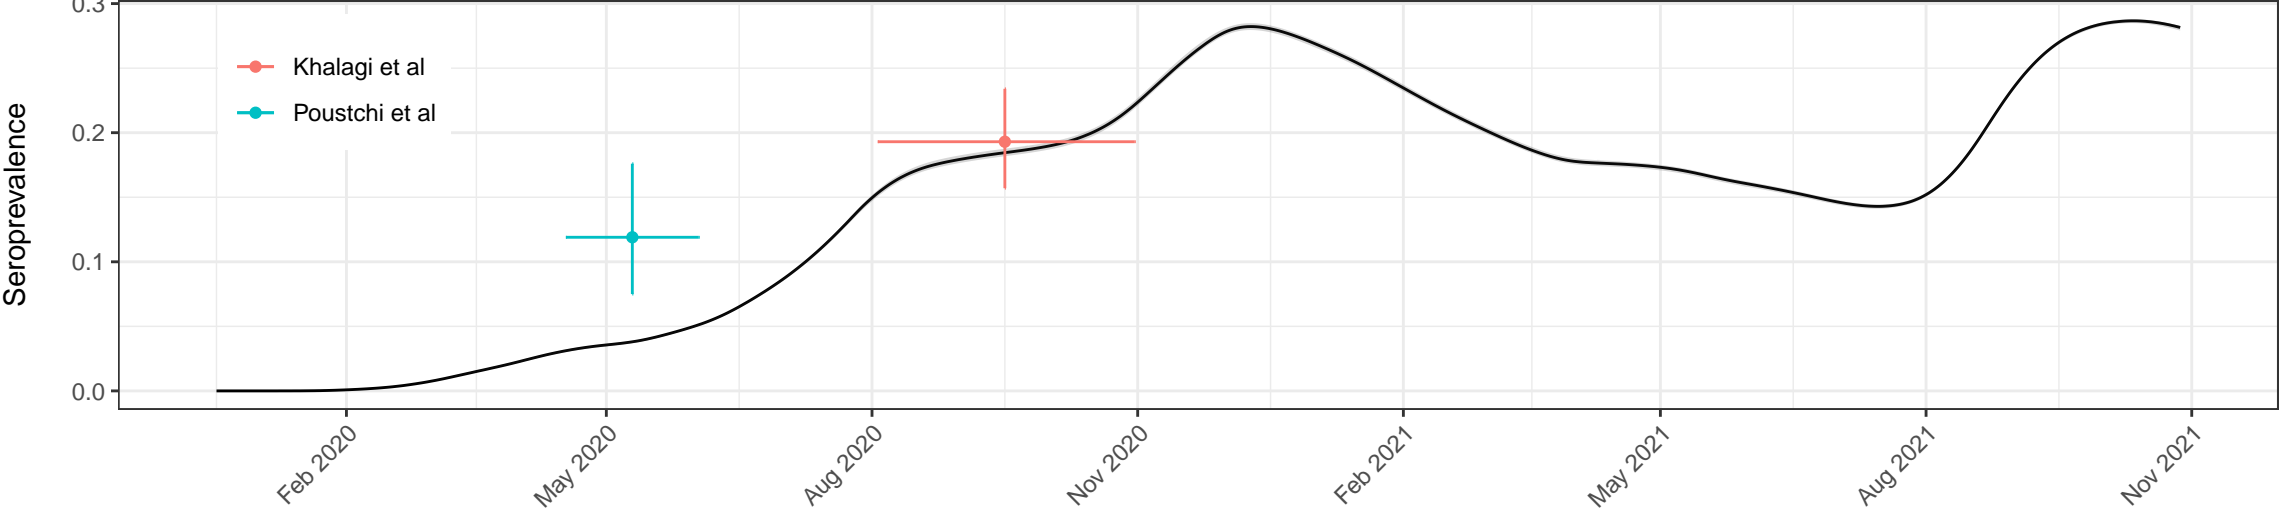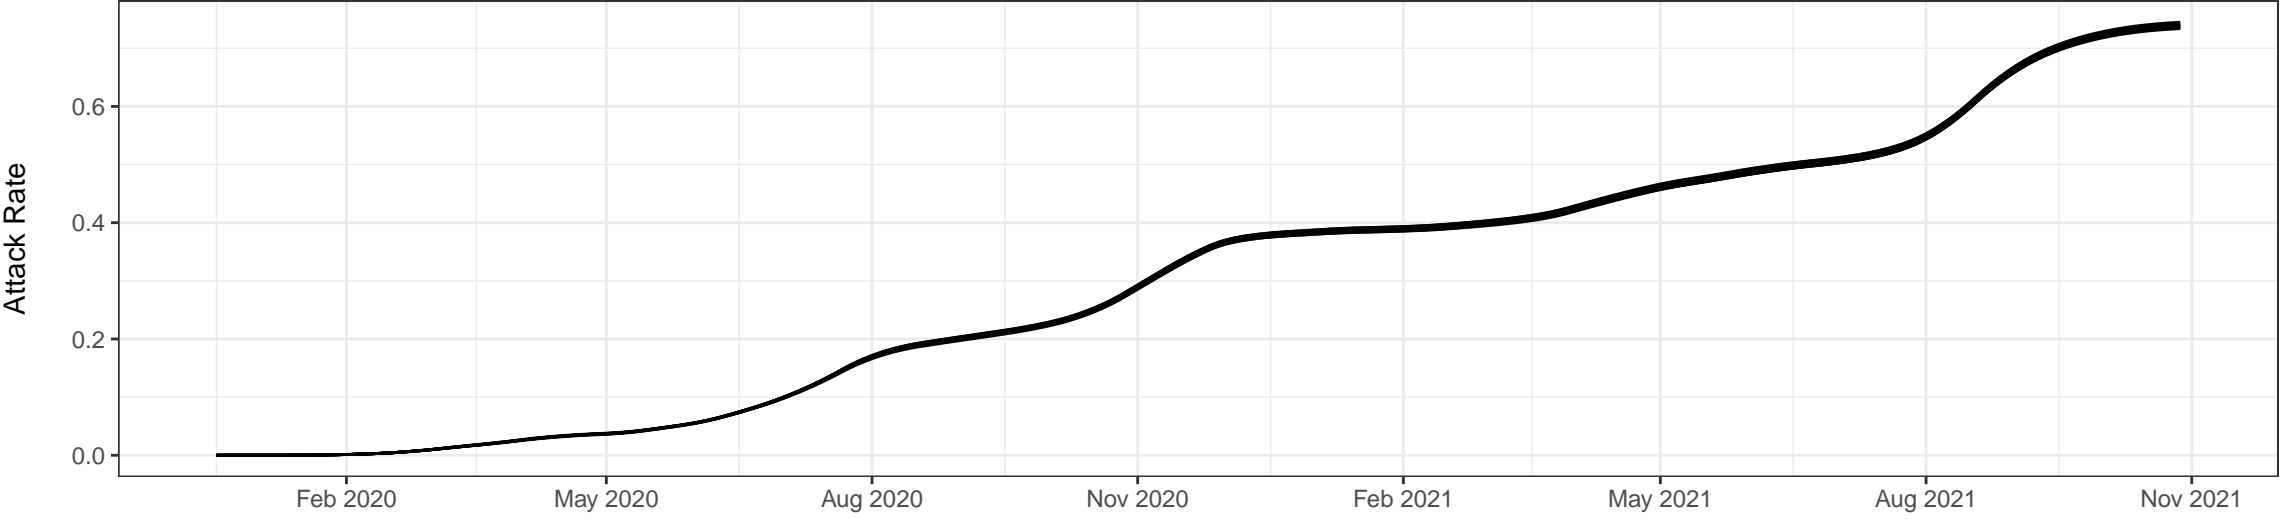

North Khorasan

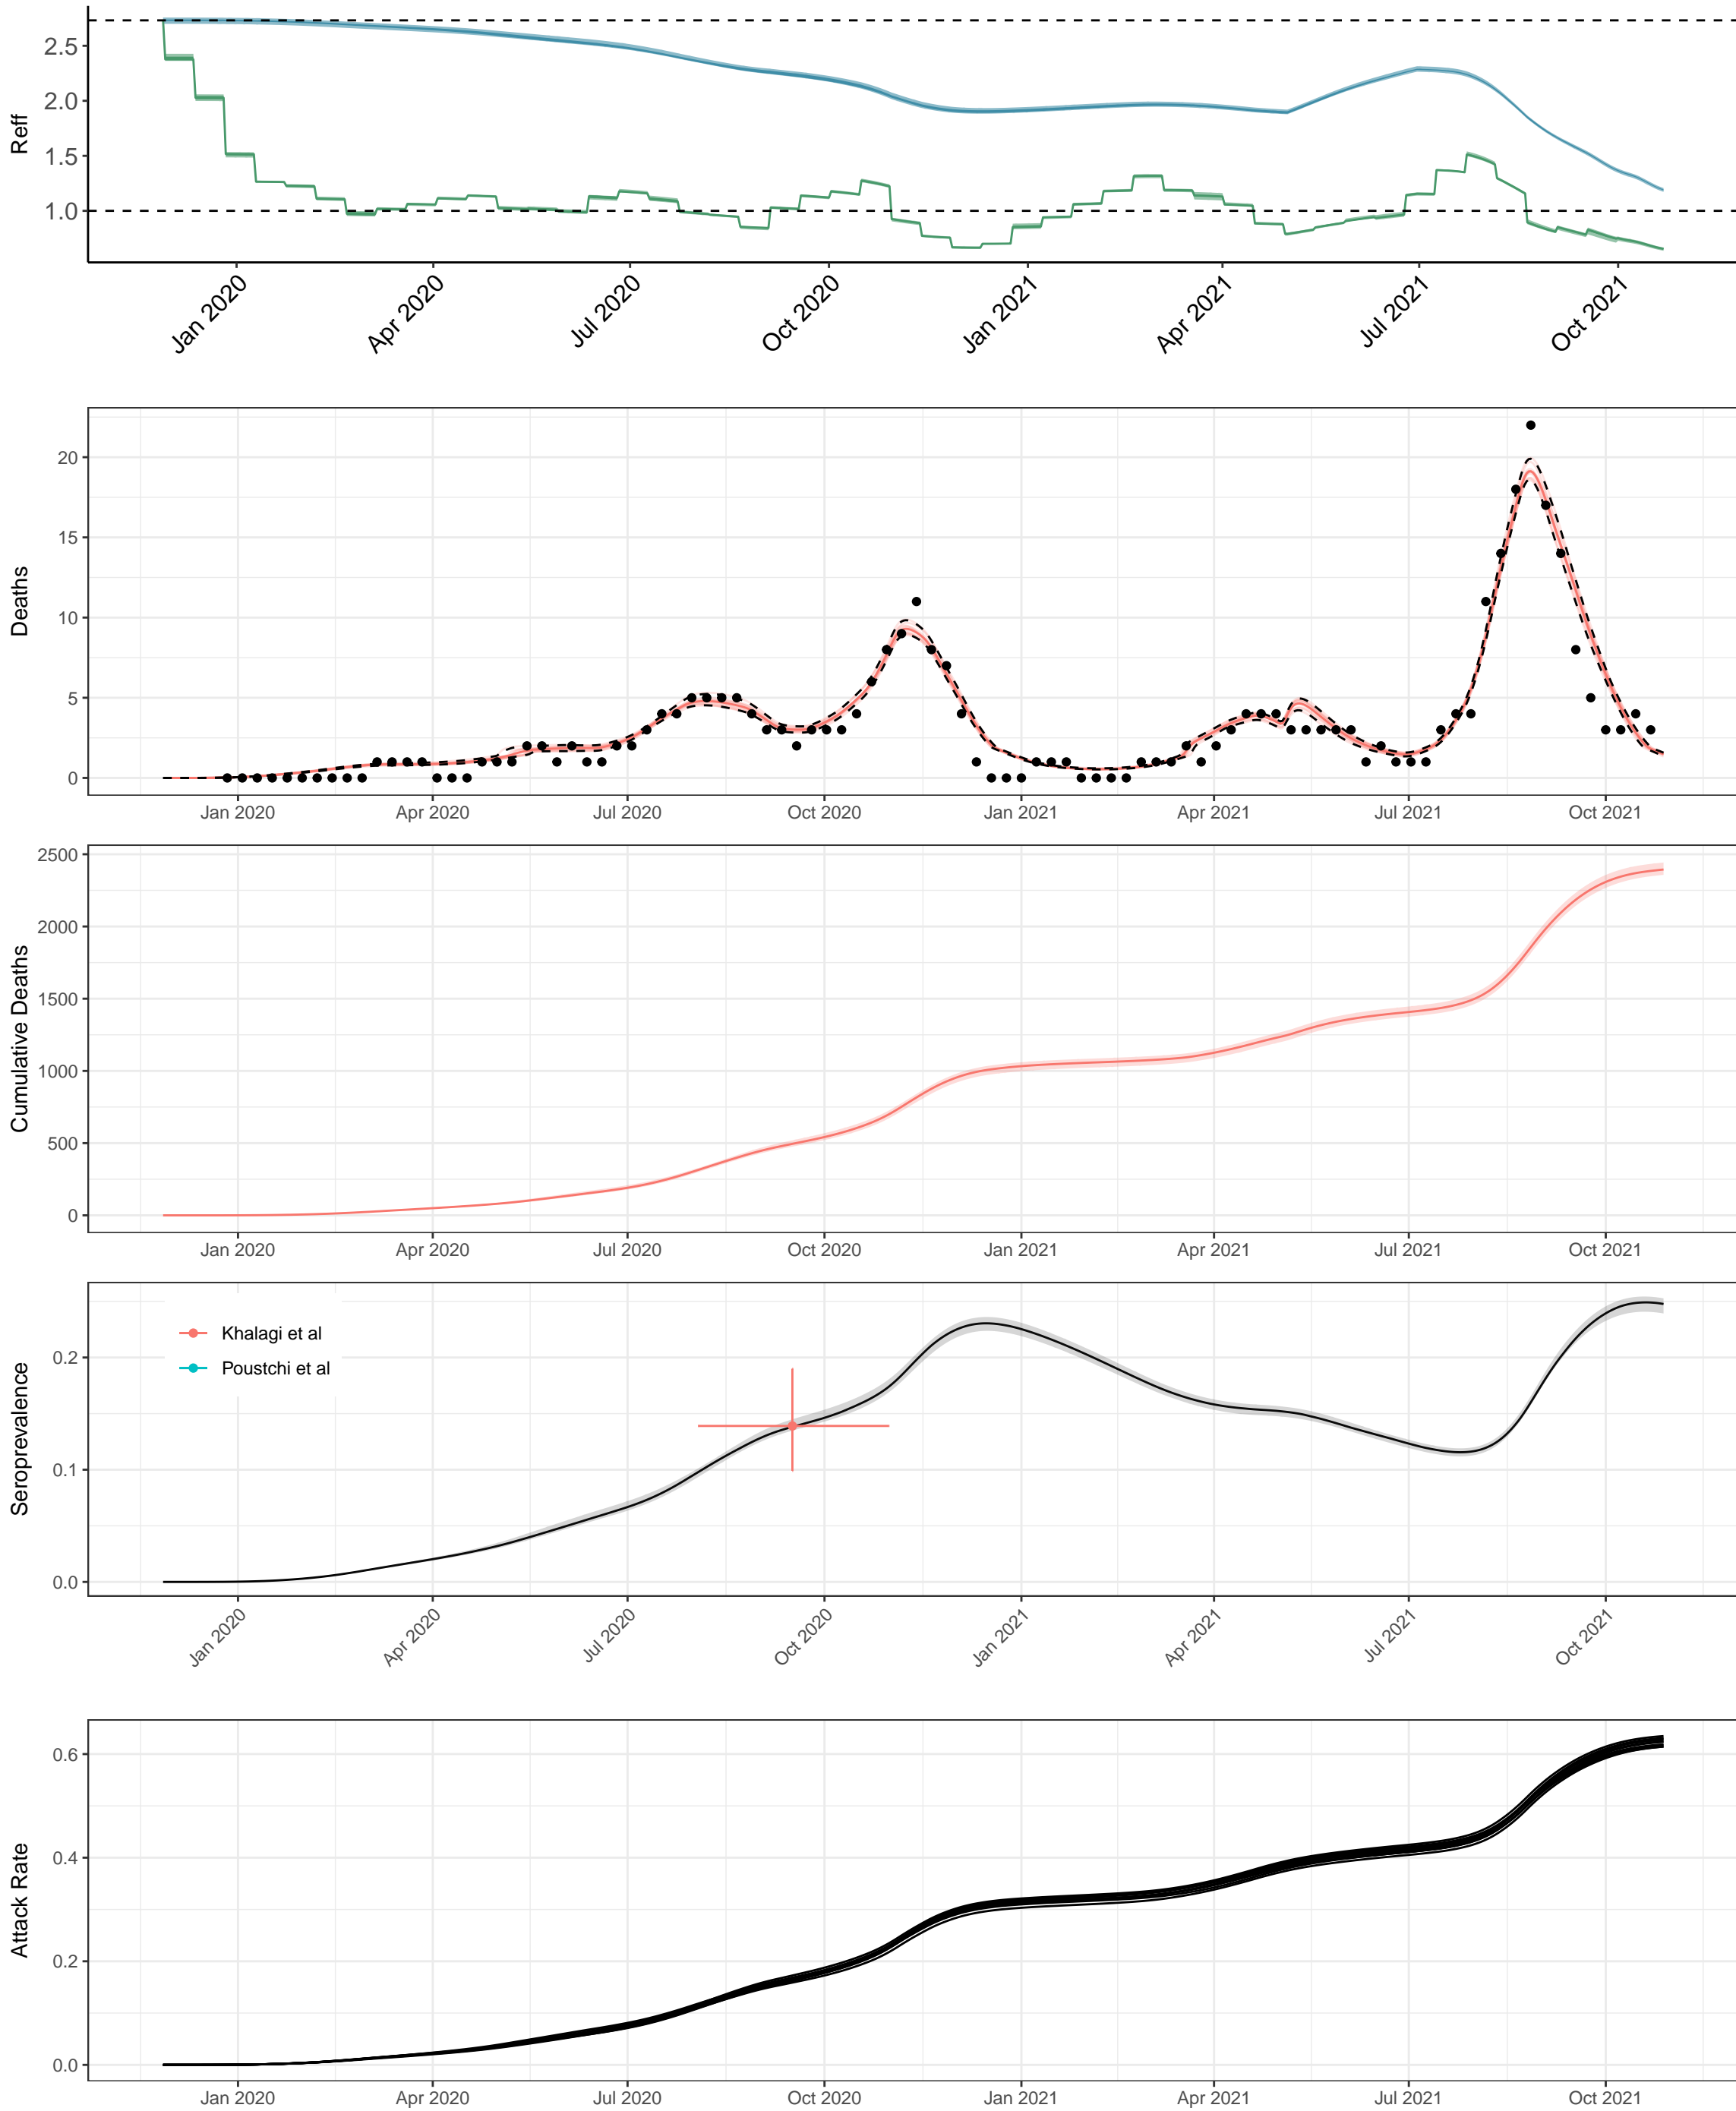

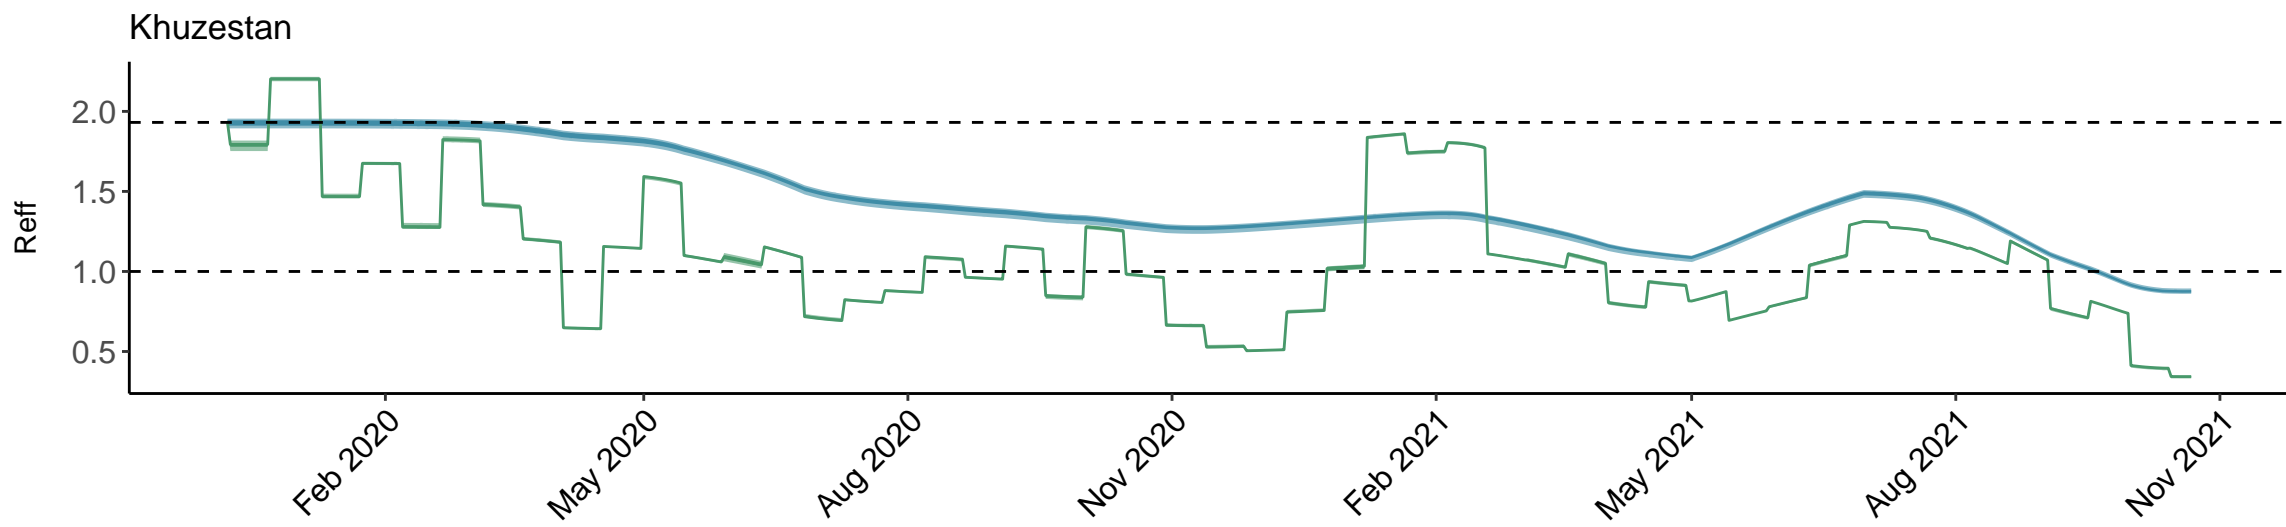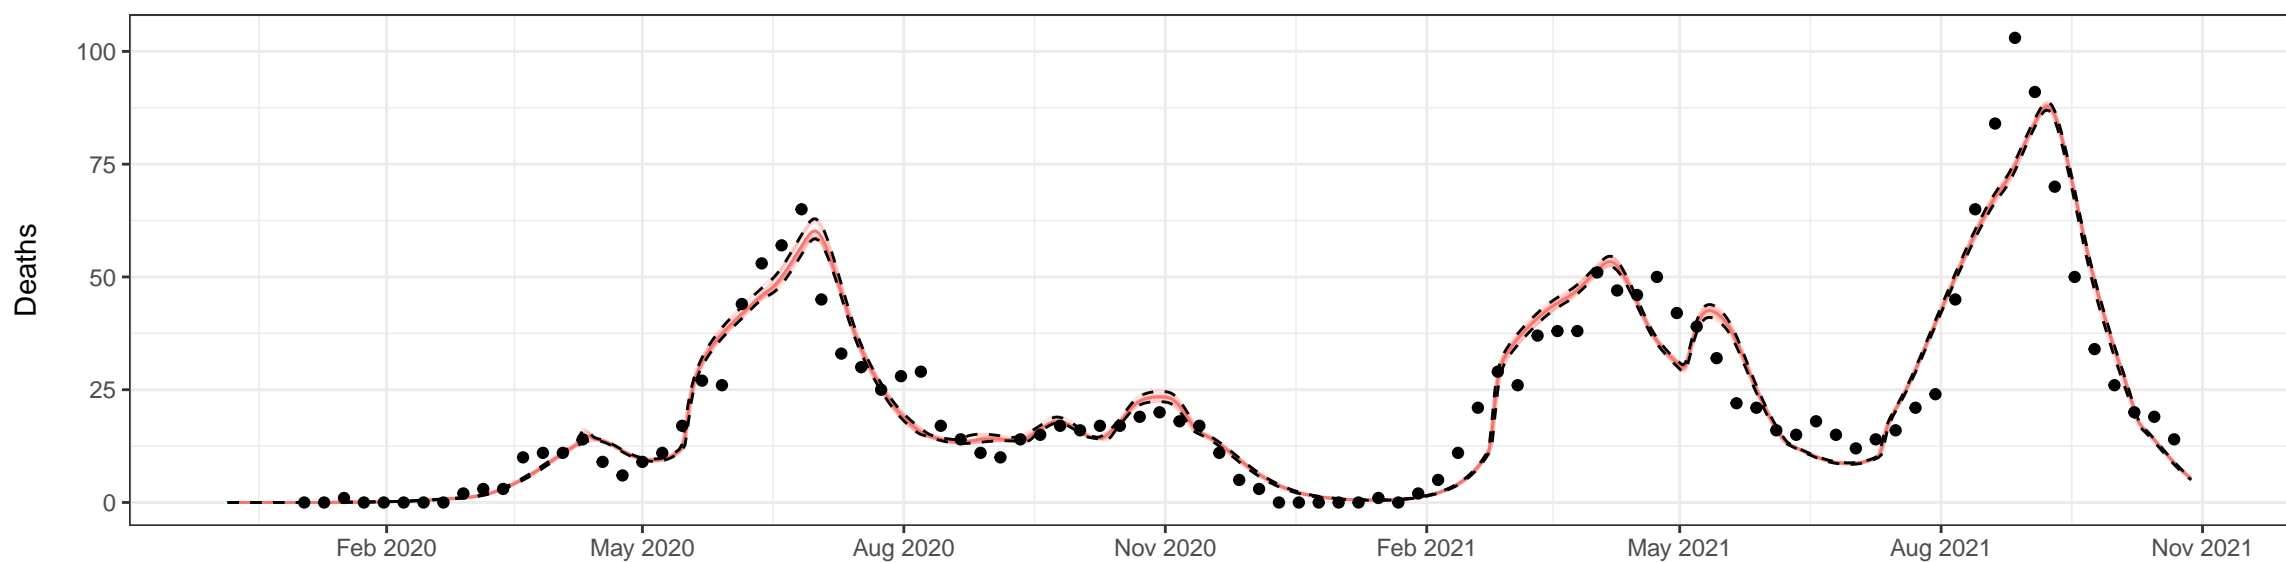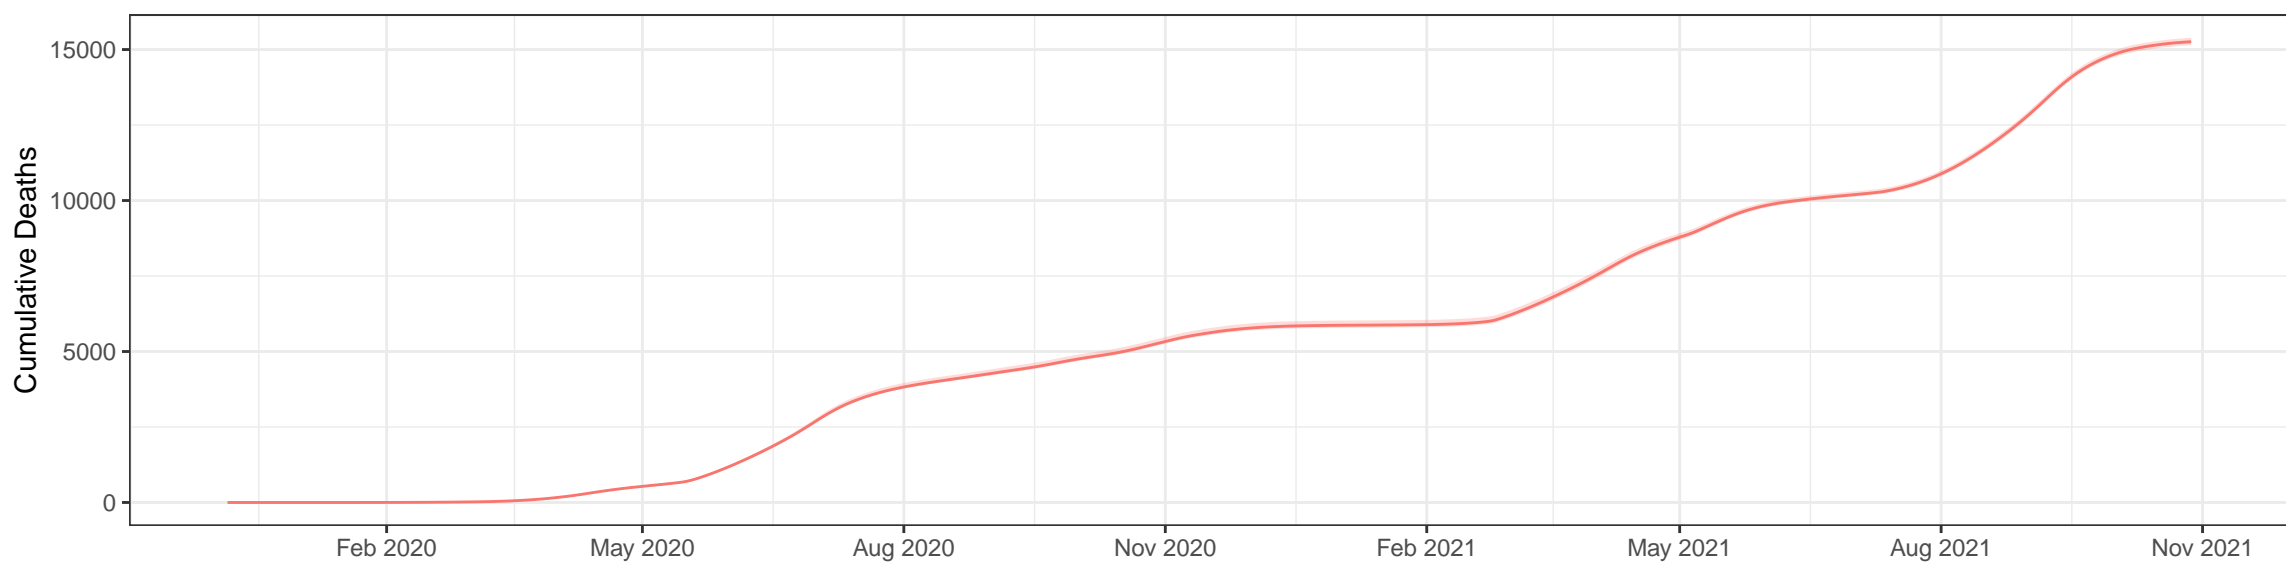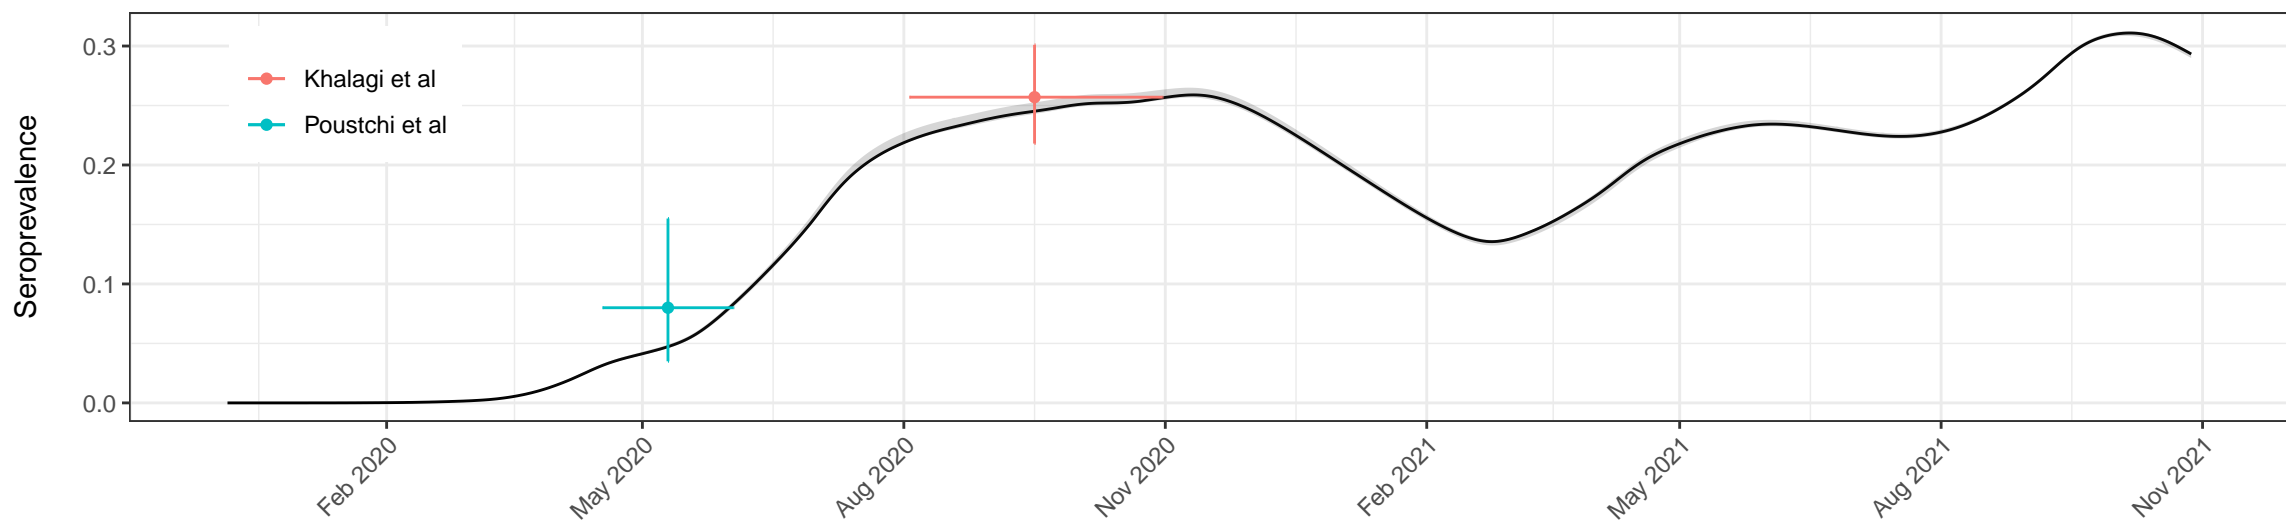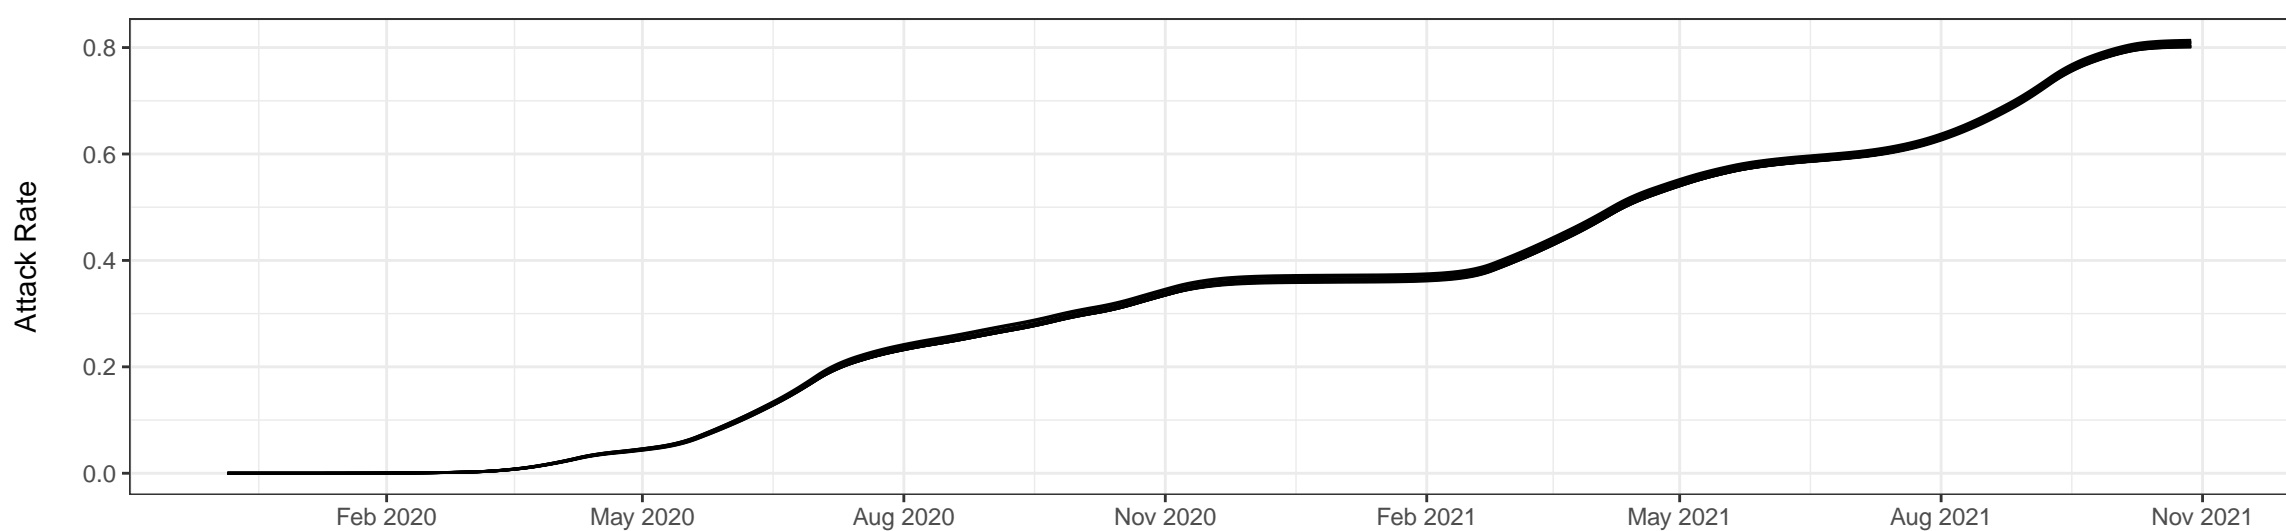

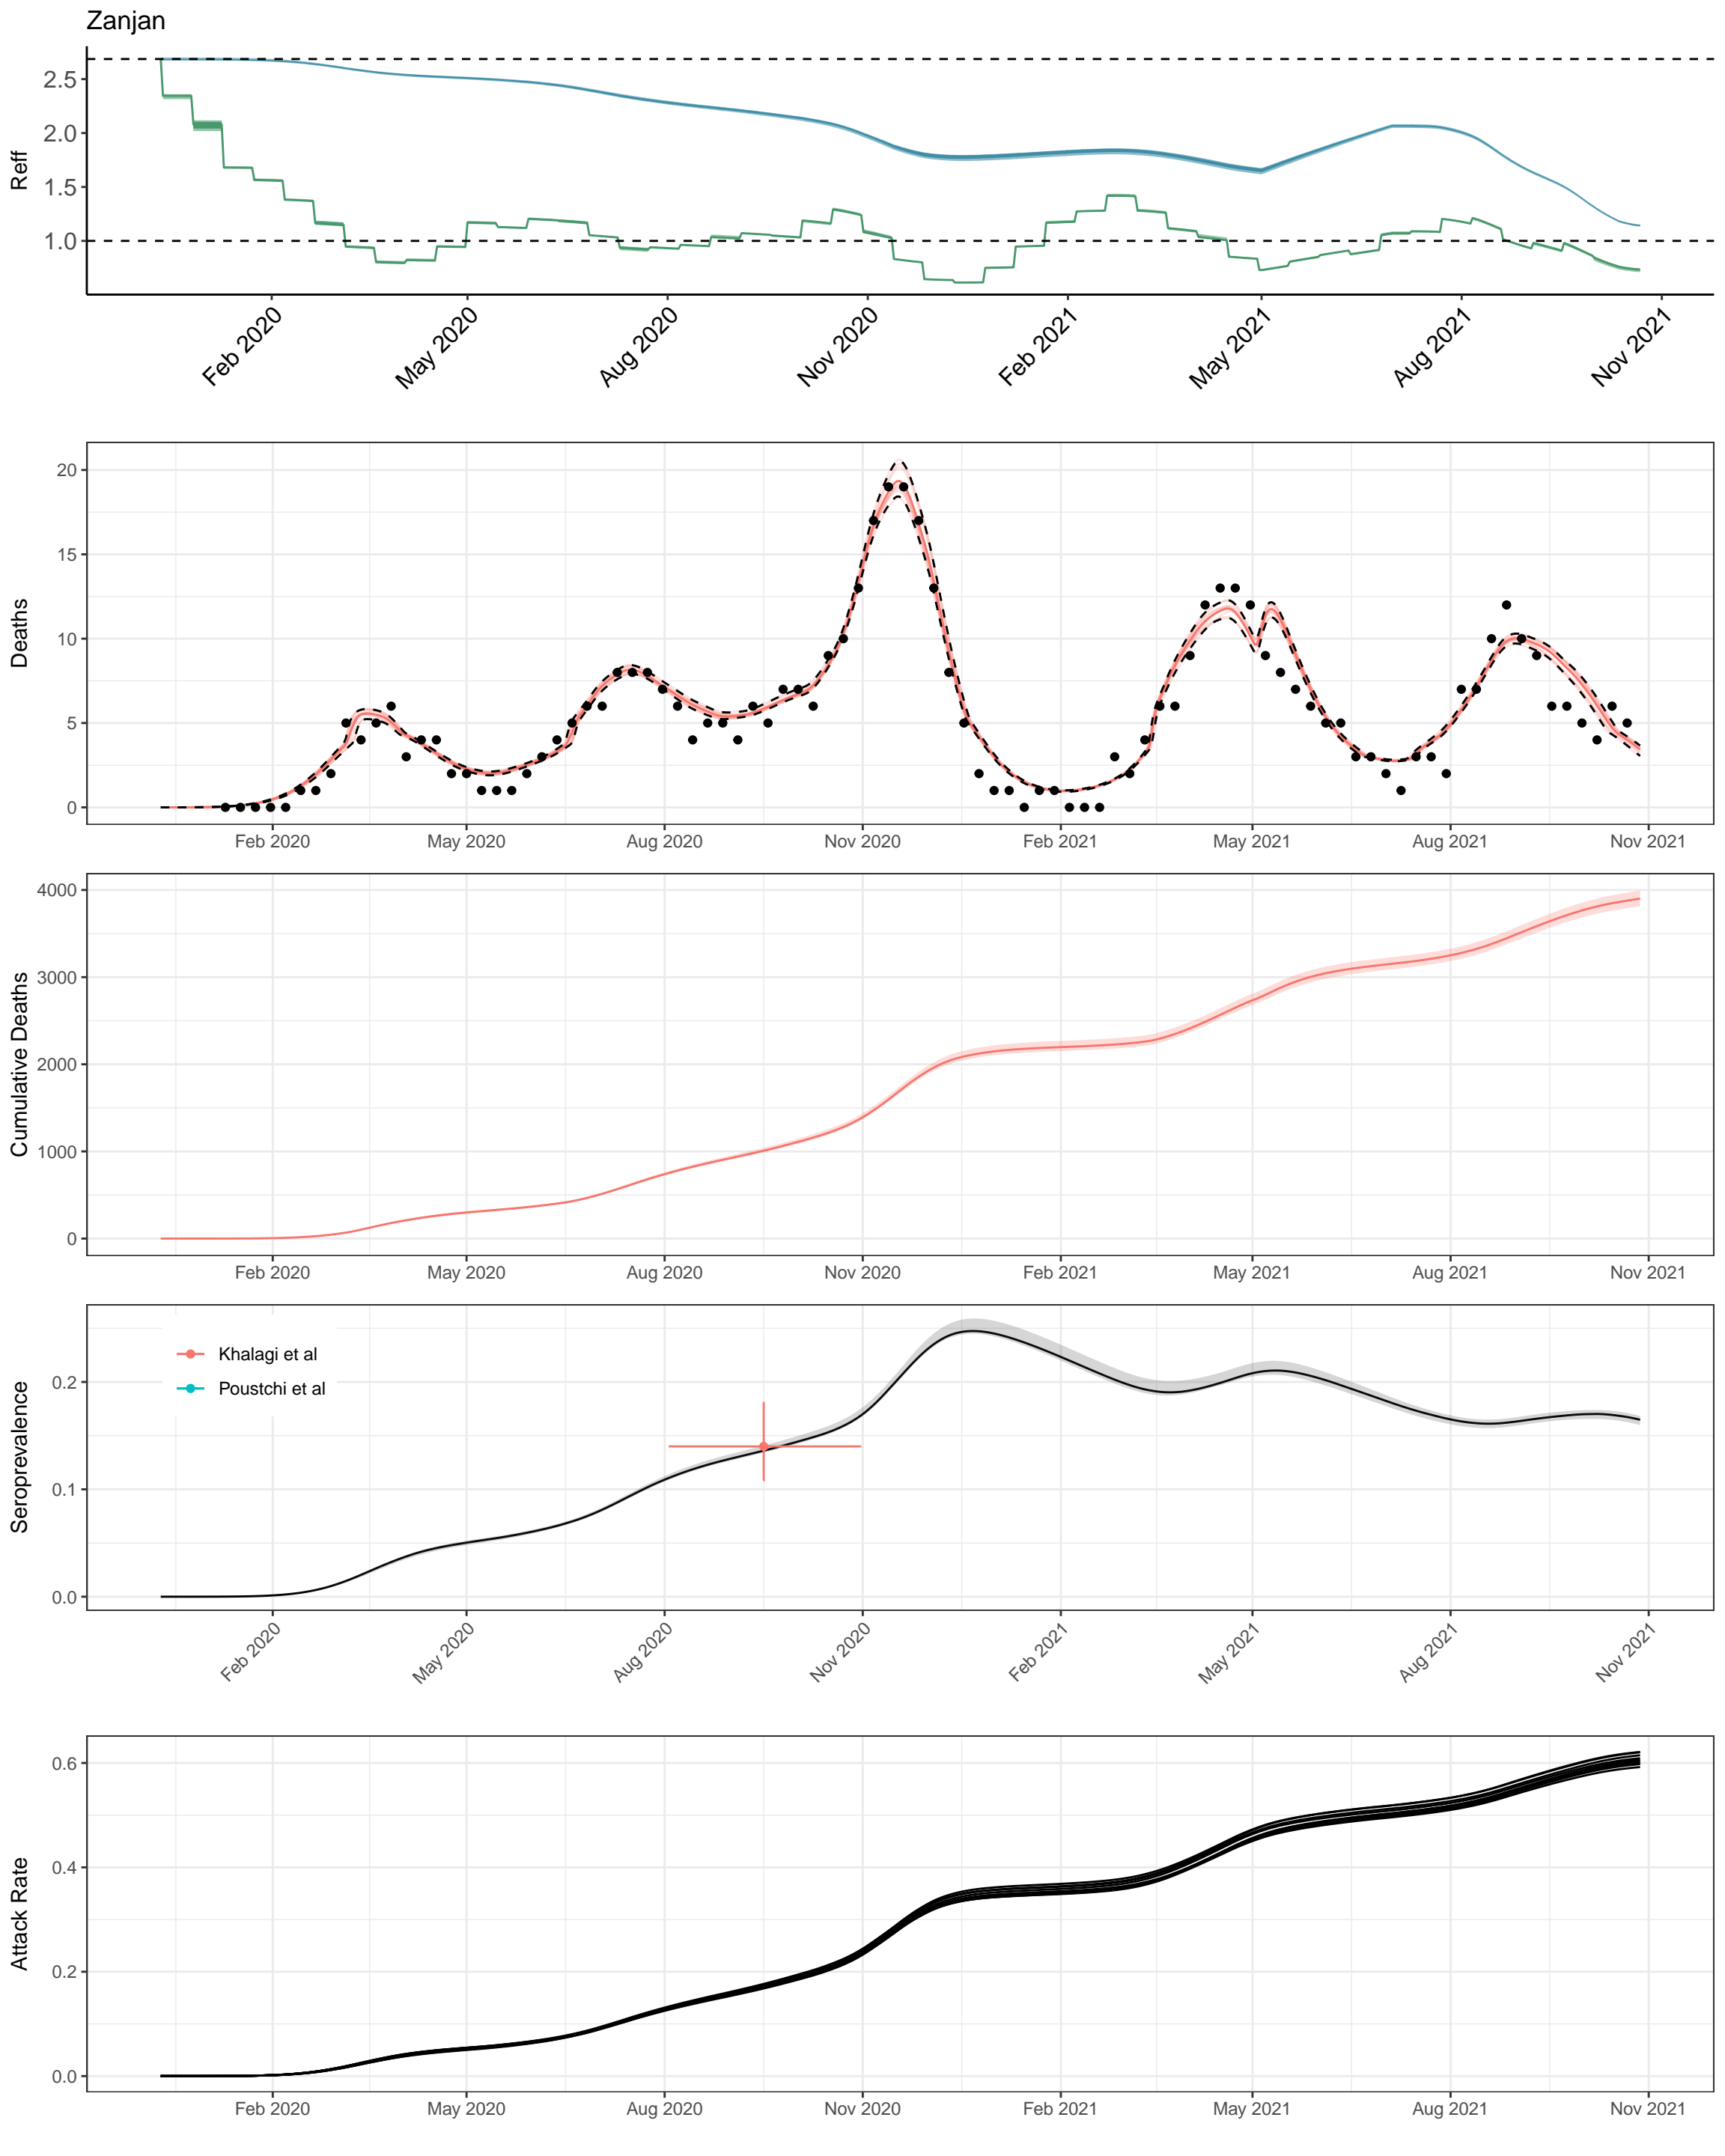

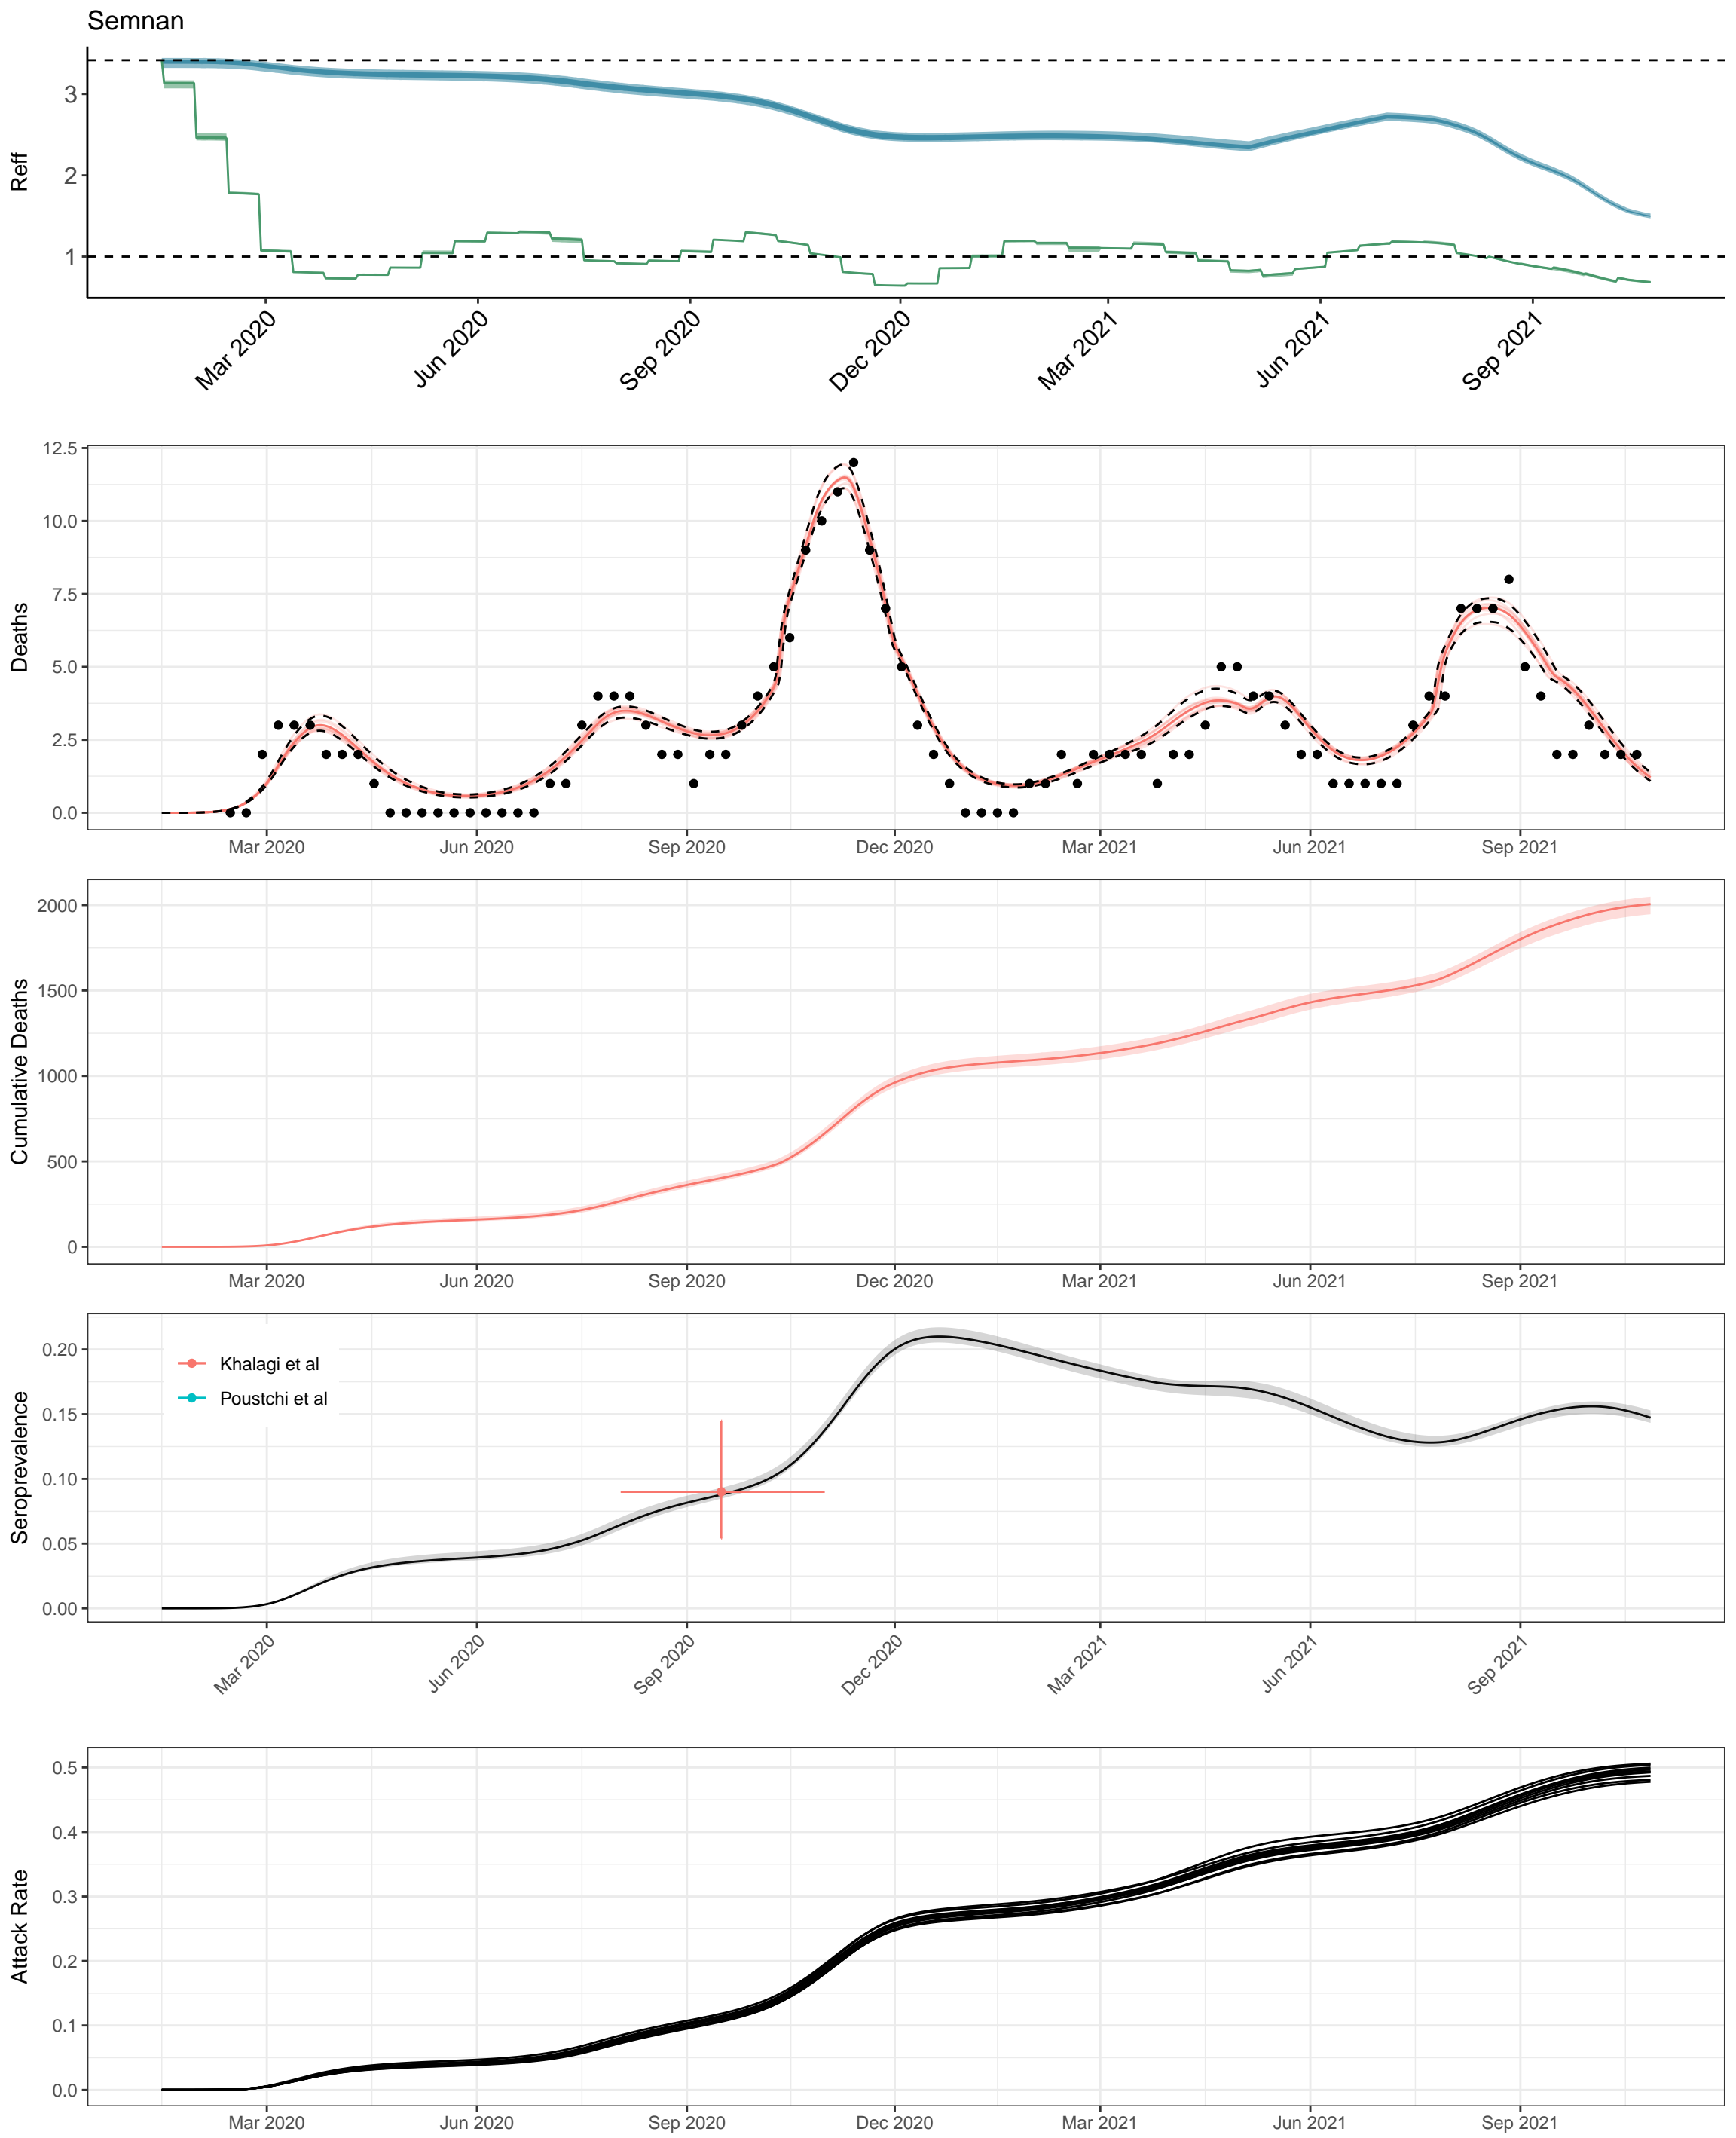

Sistan and Baluchistan

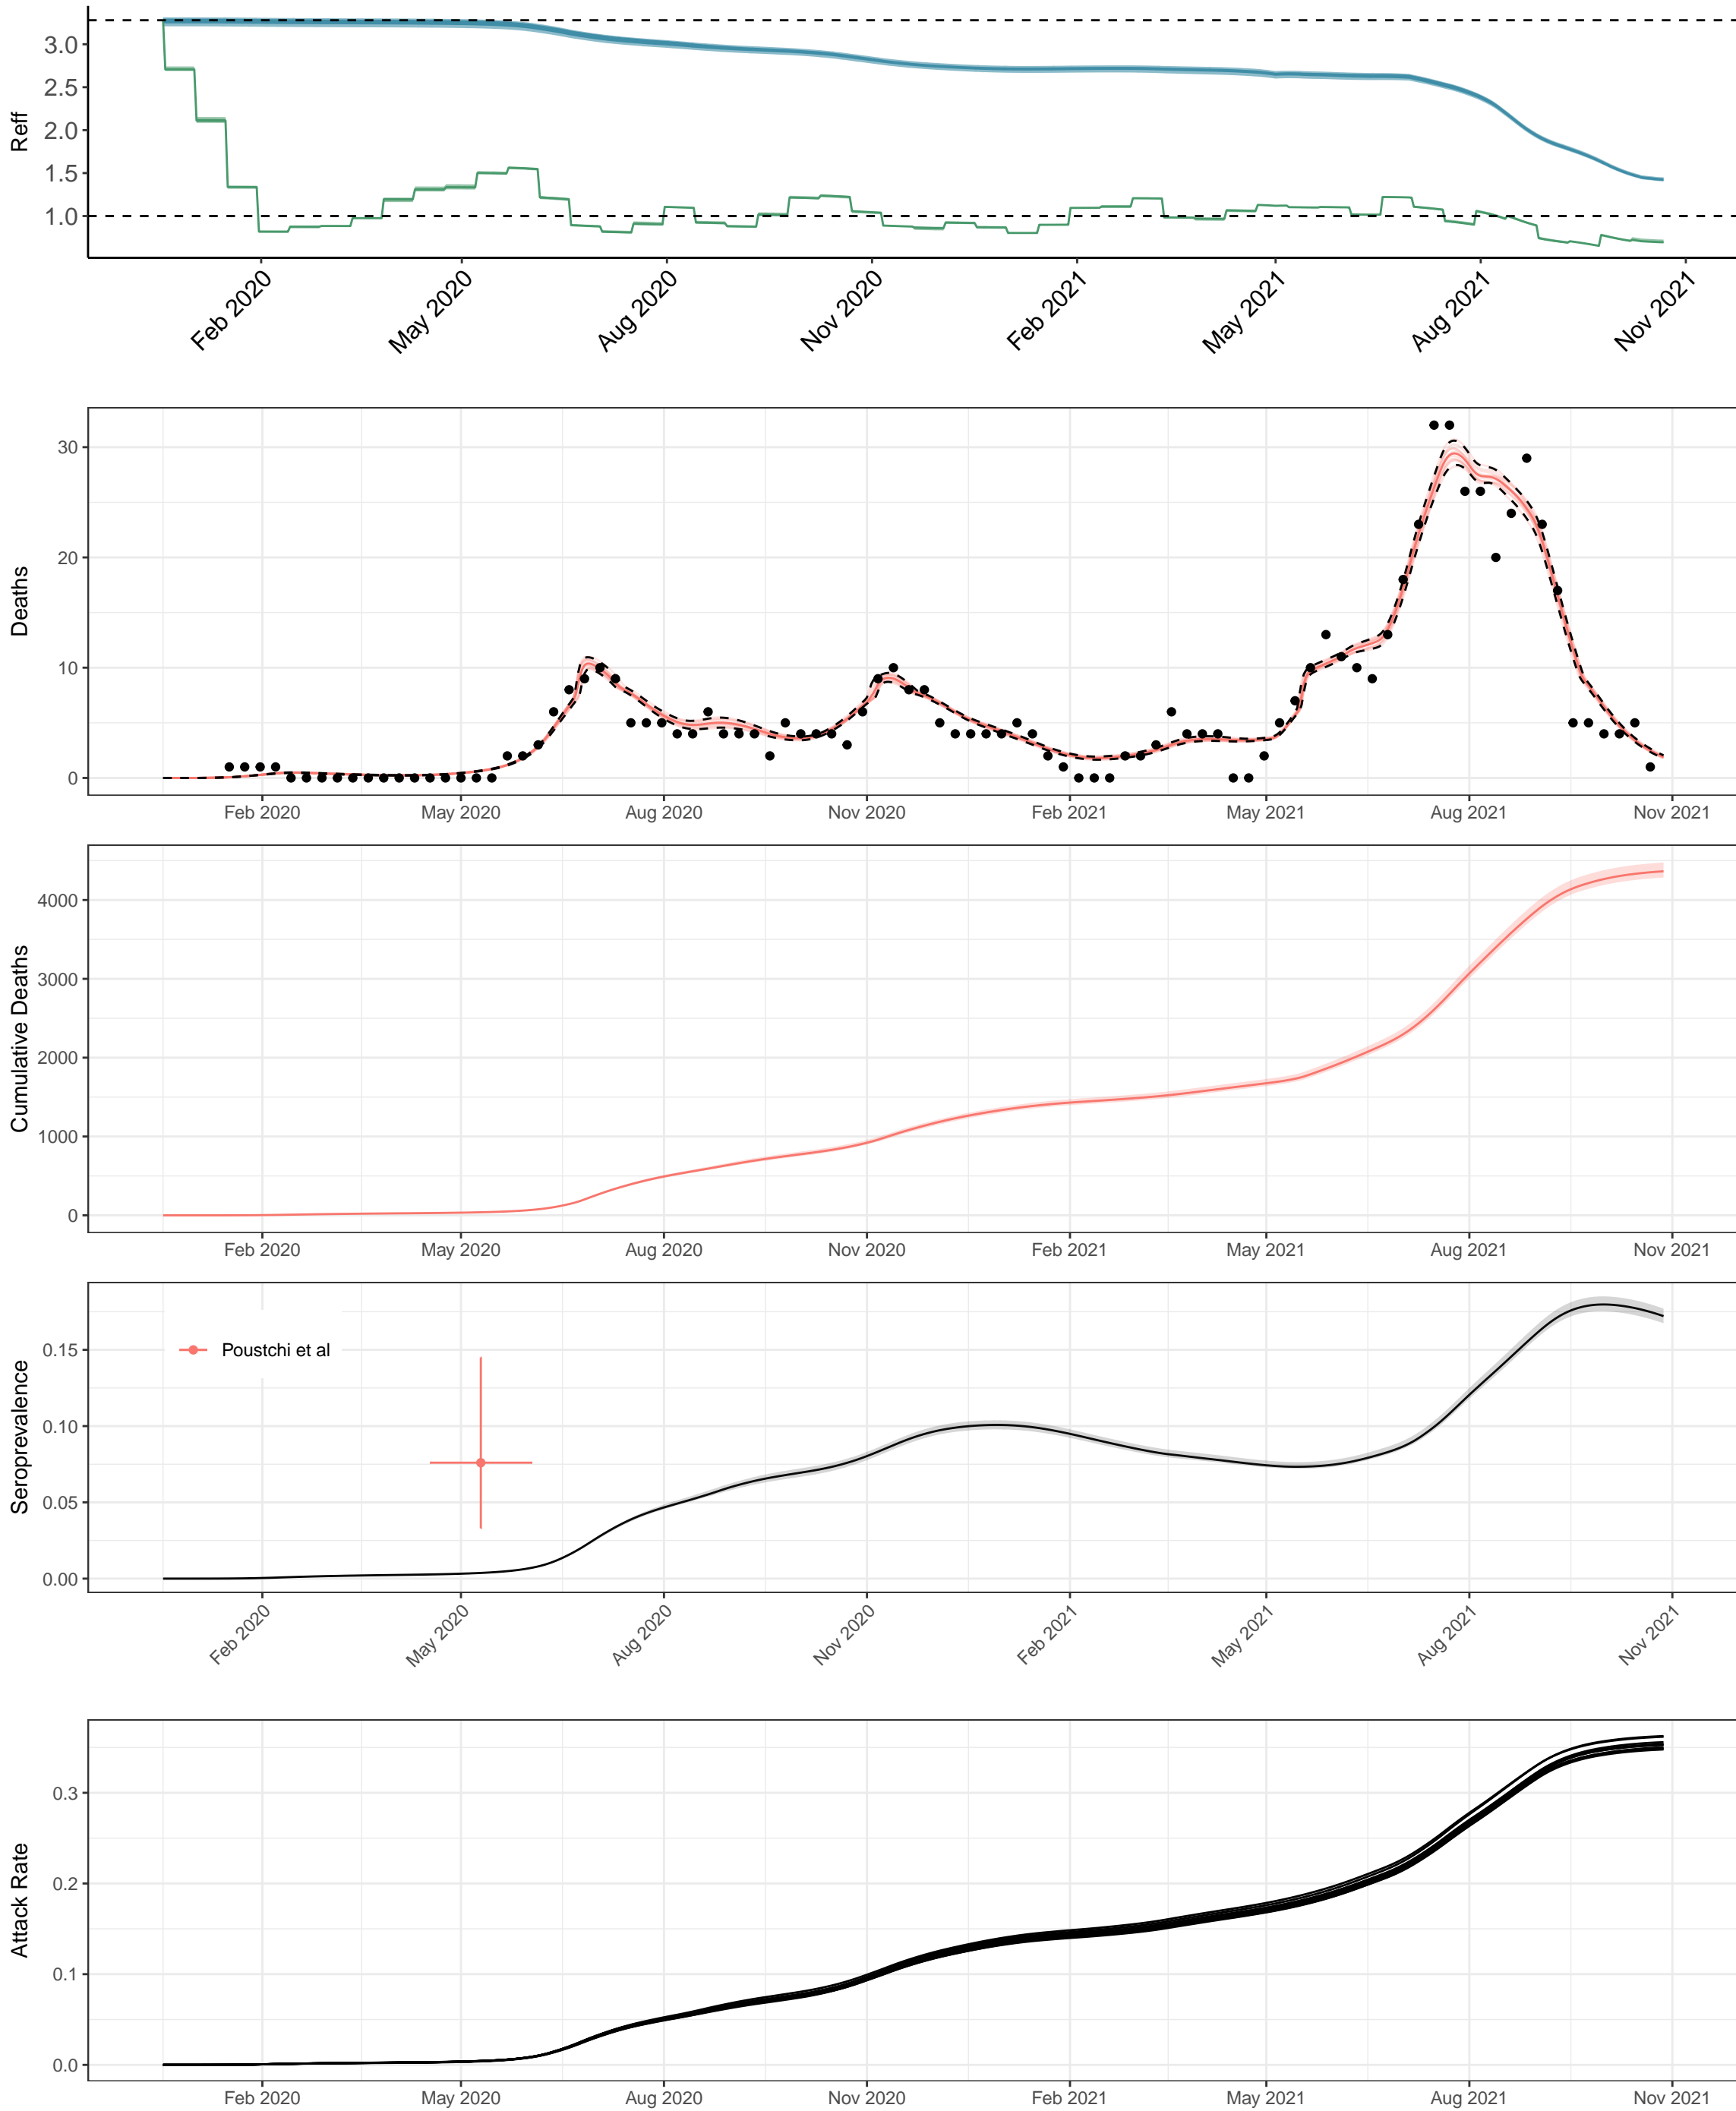



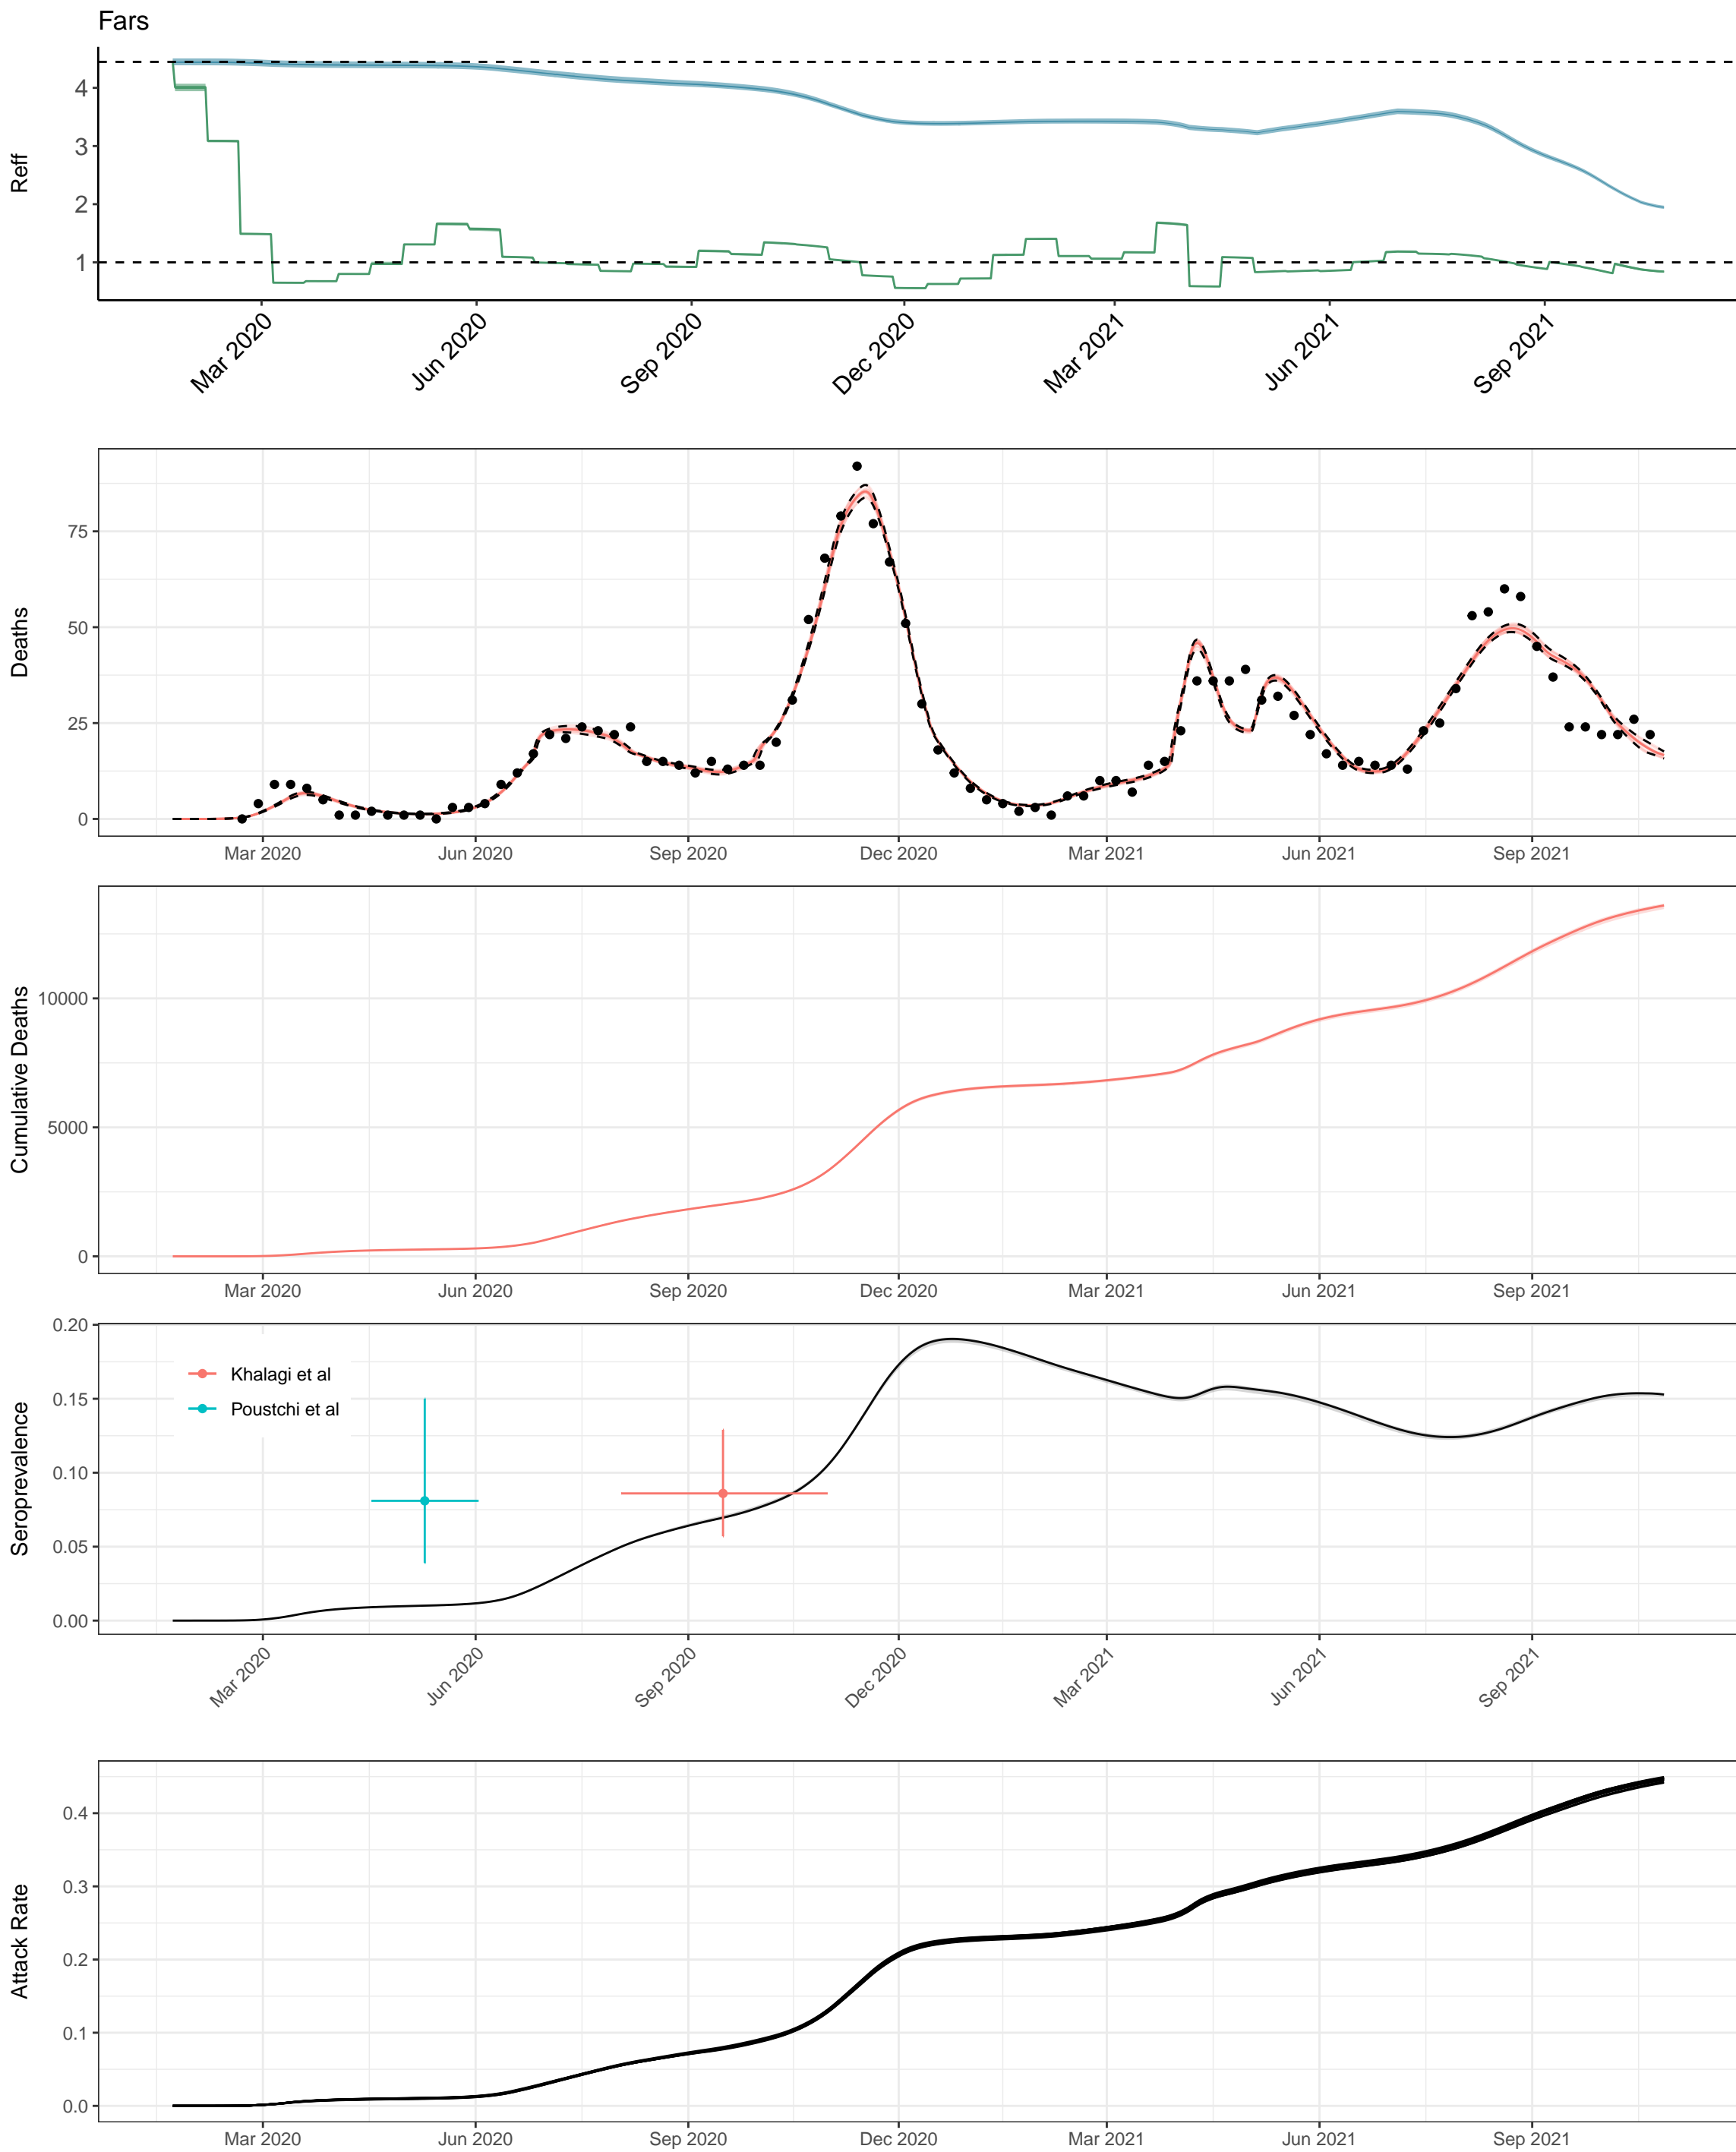

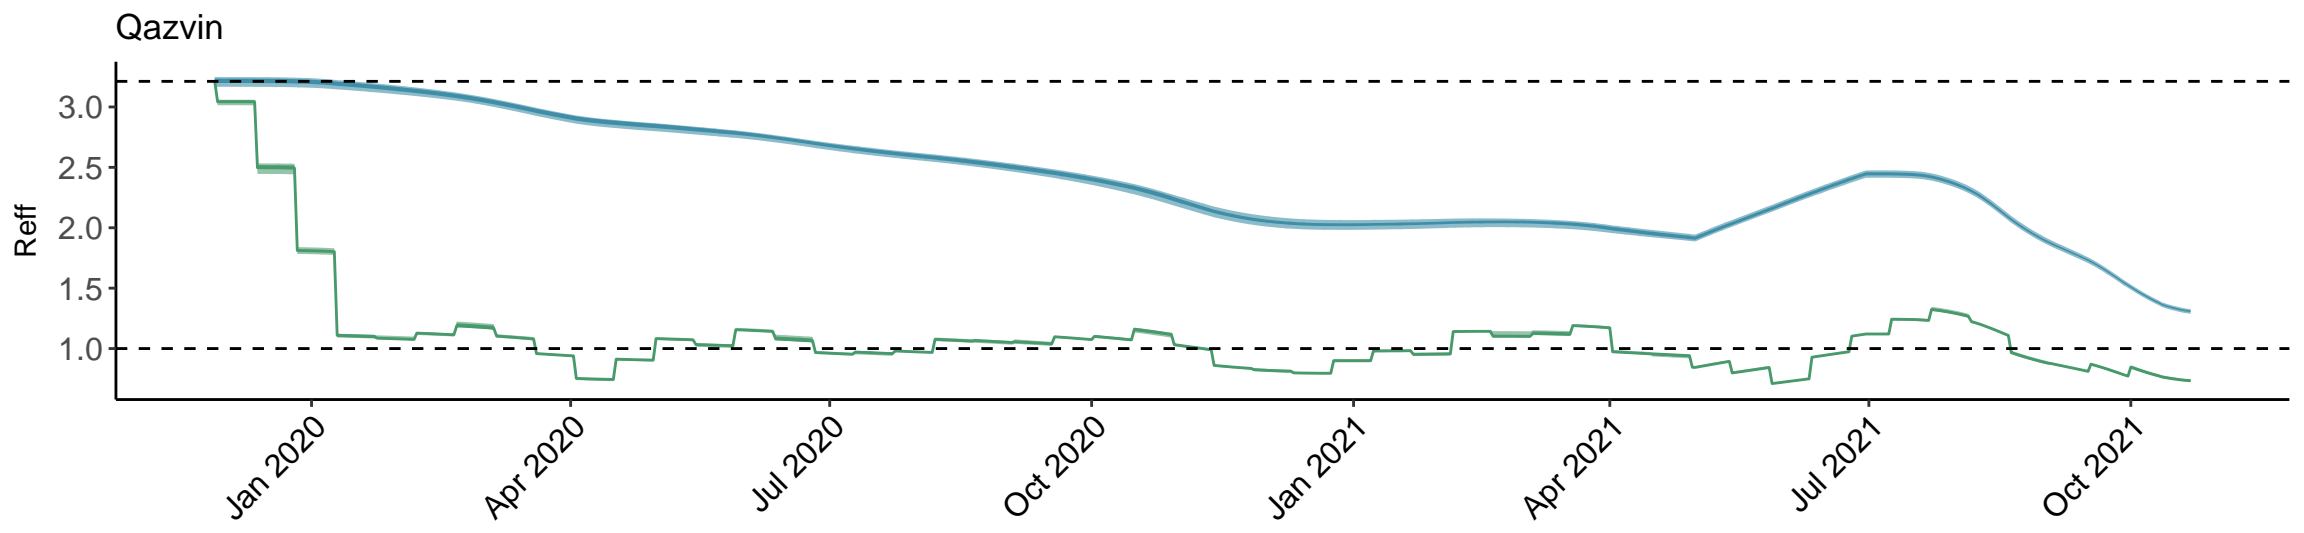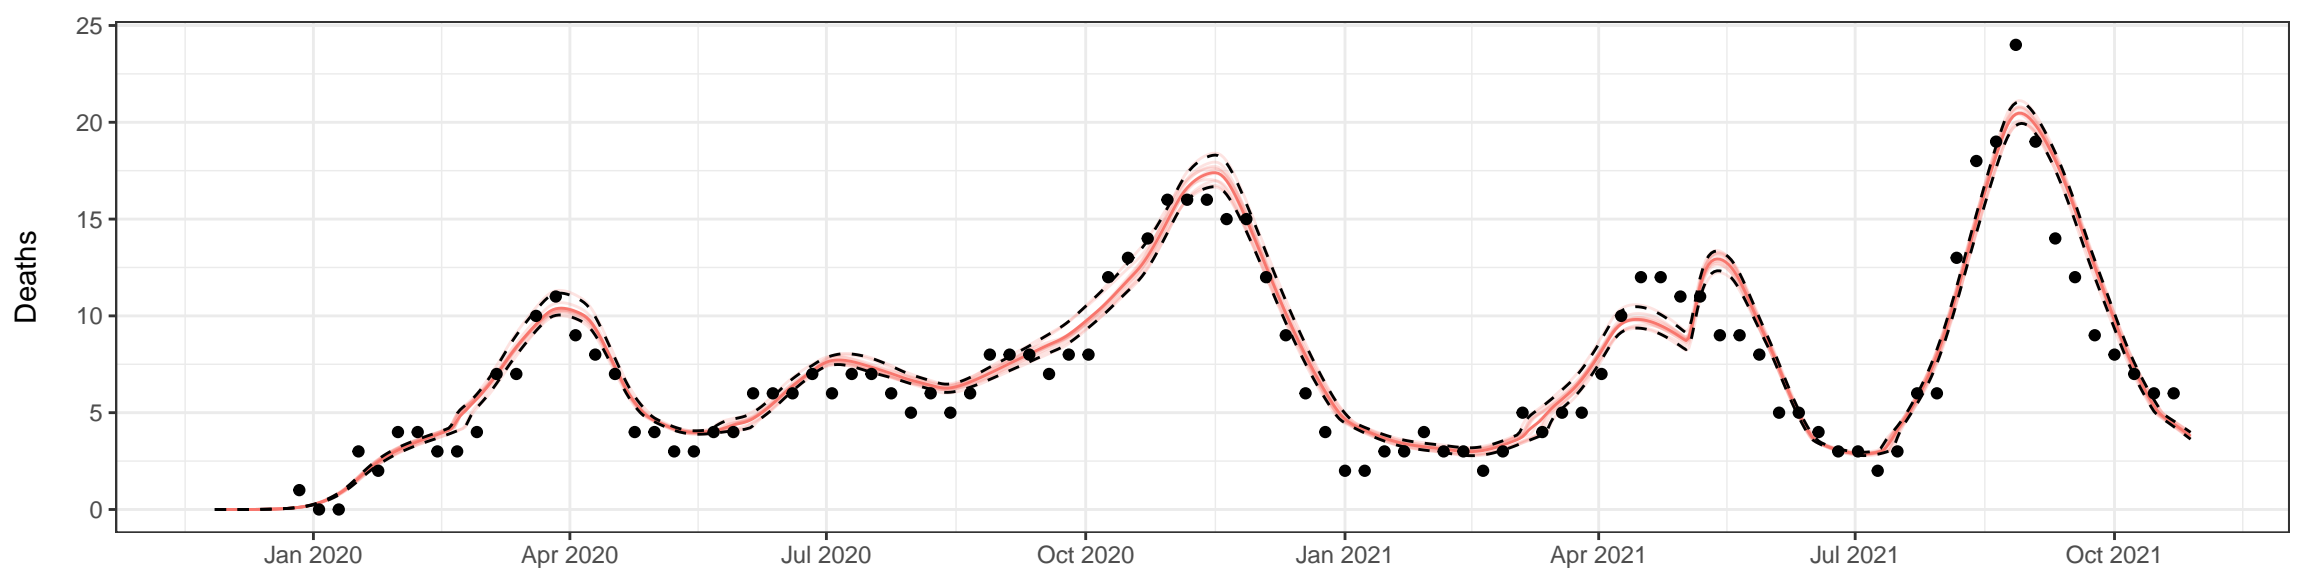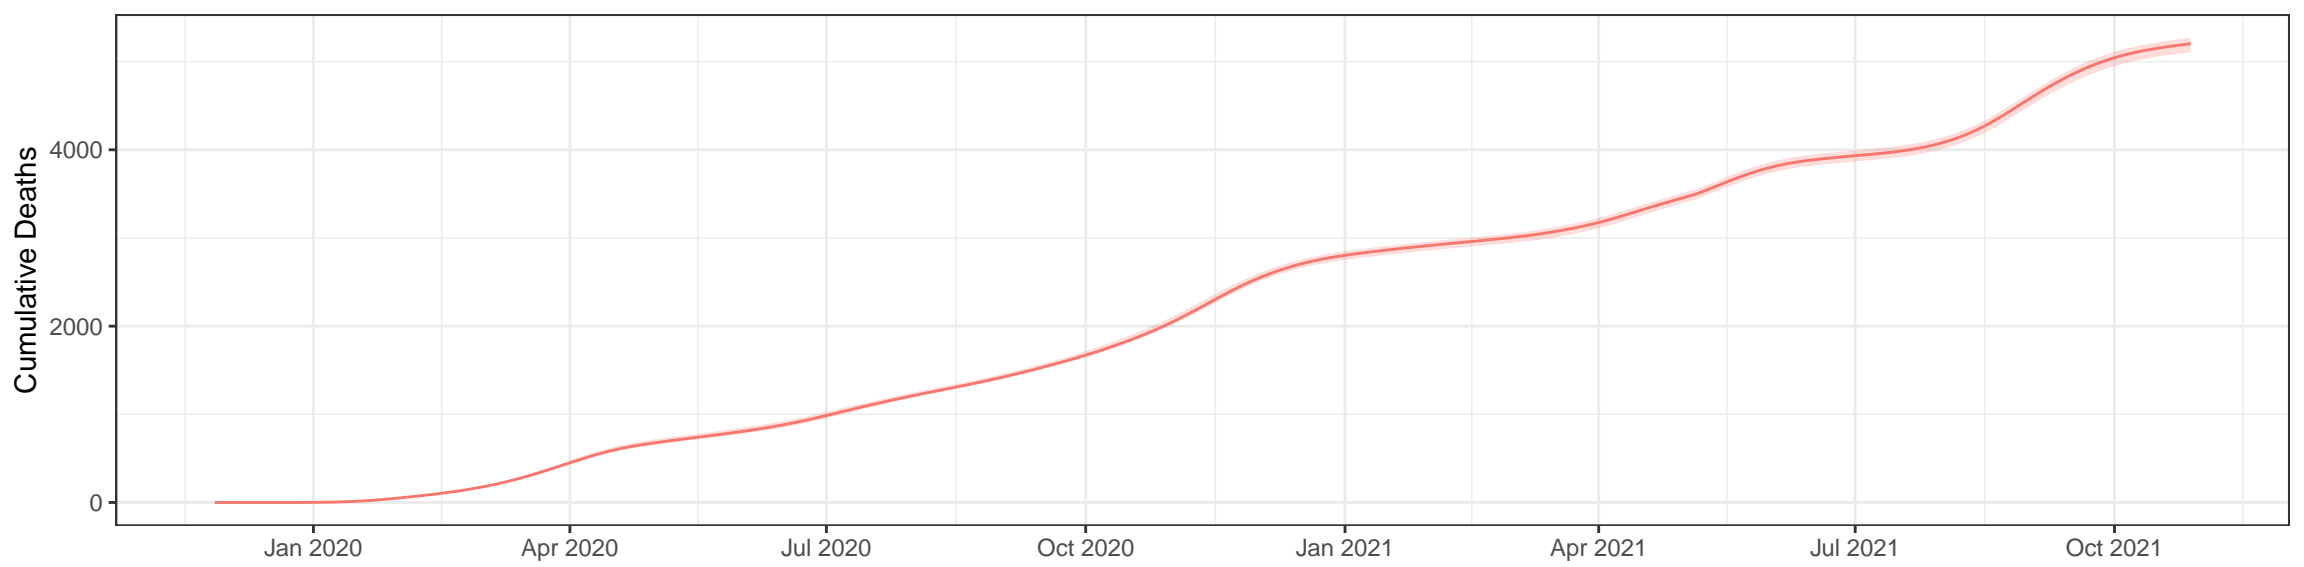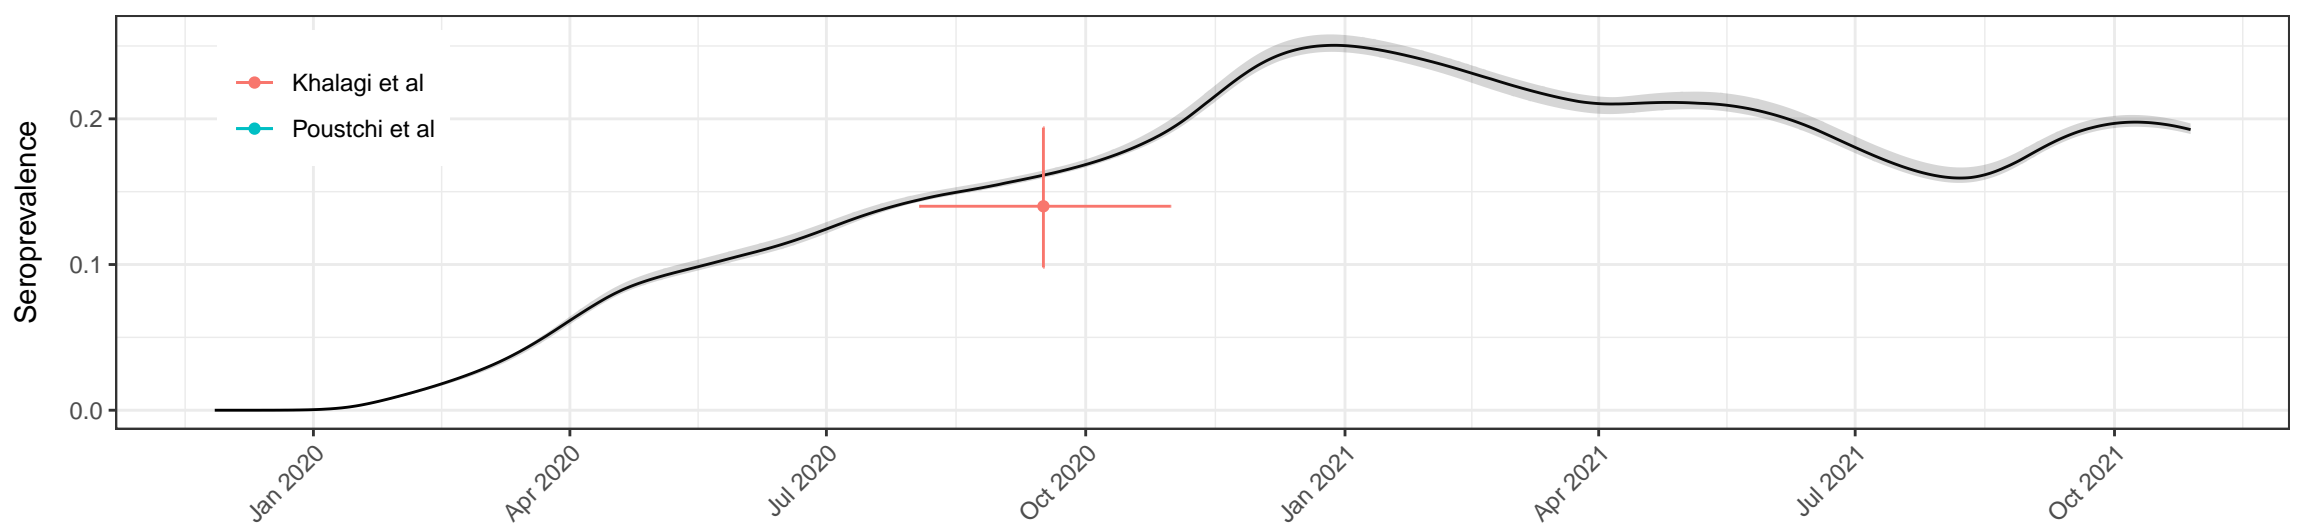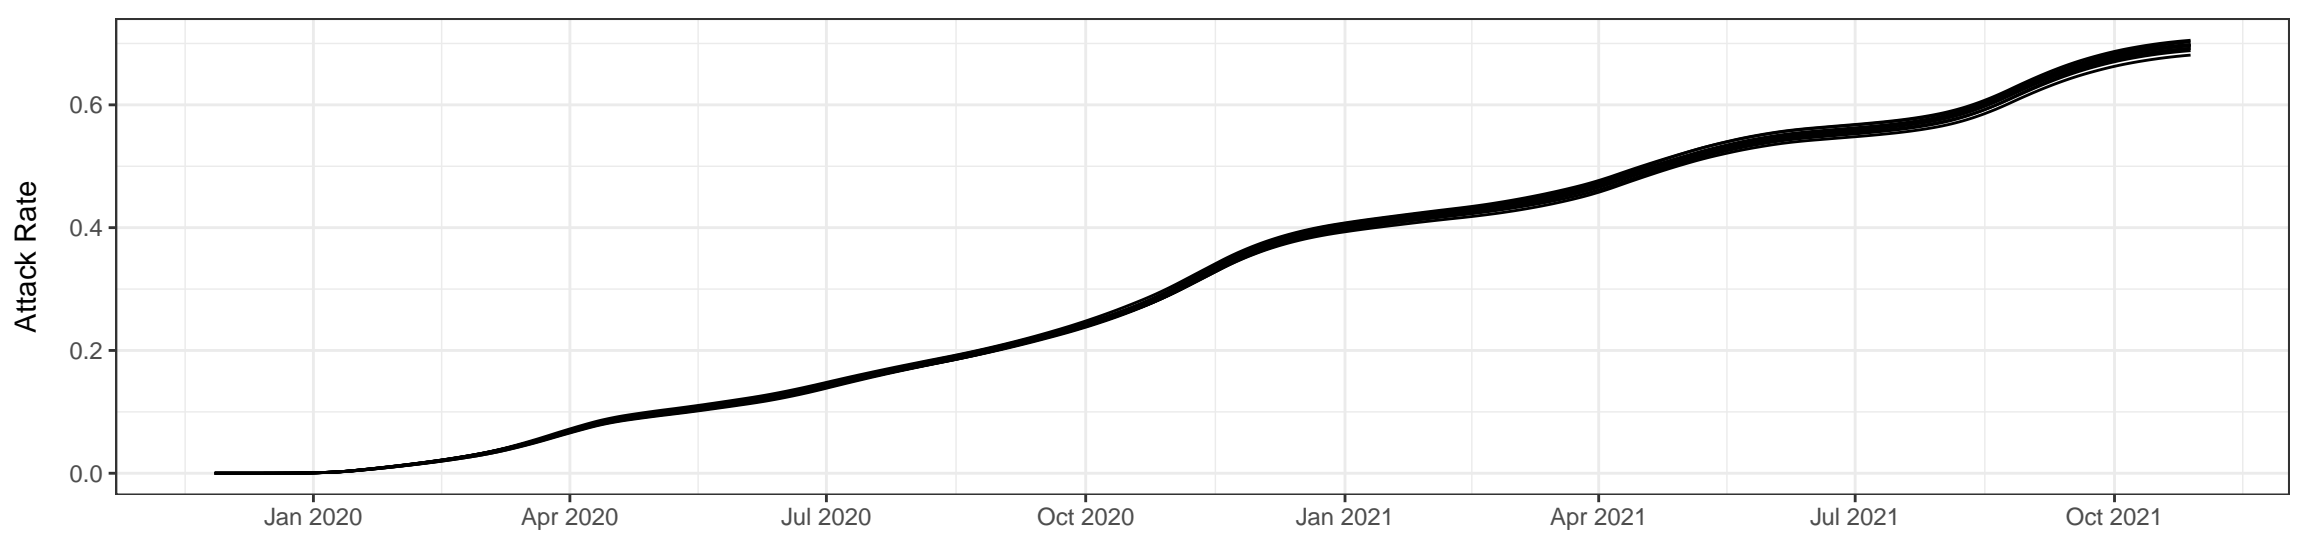

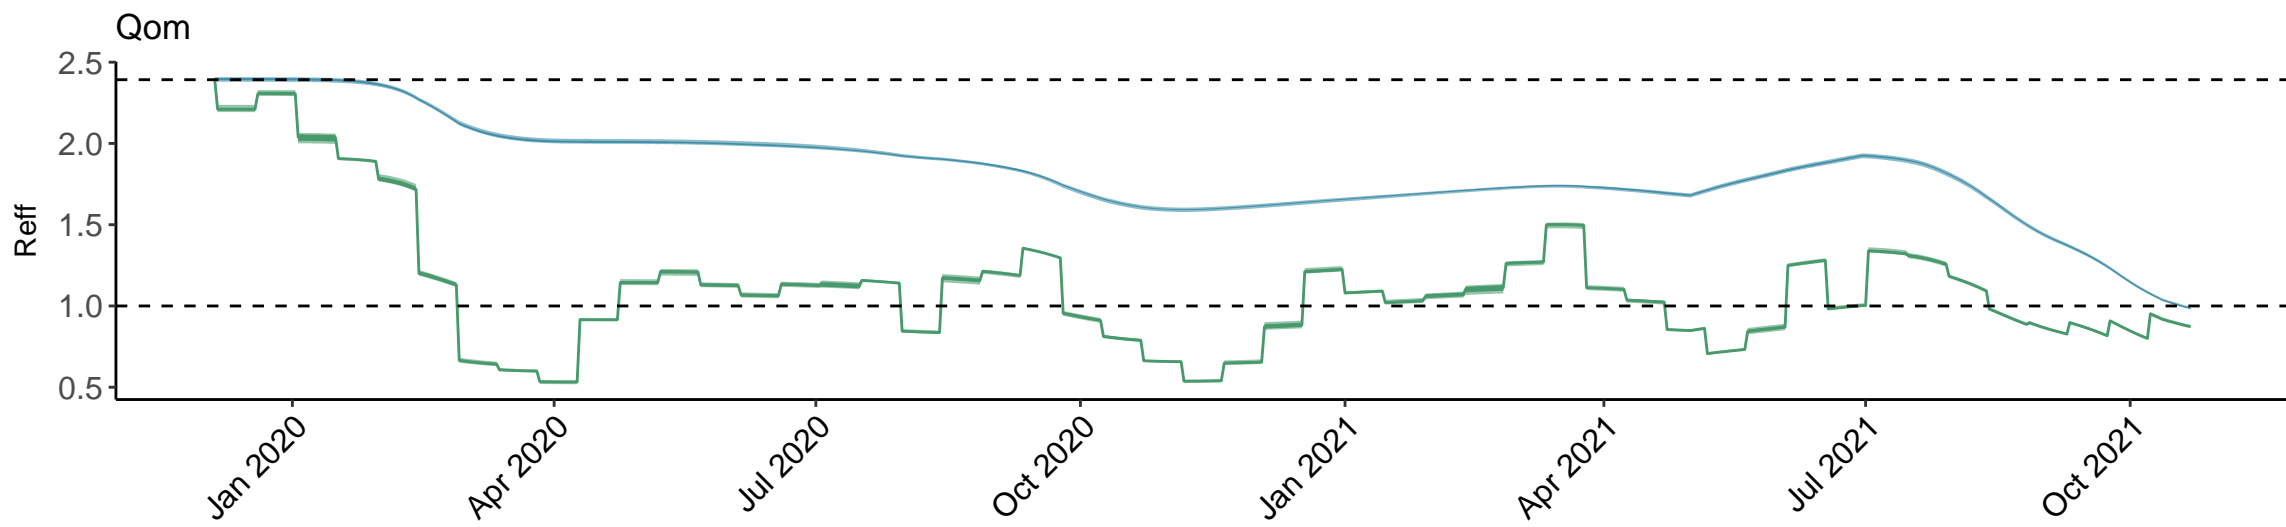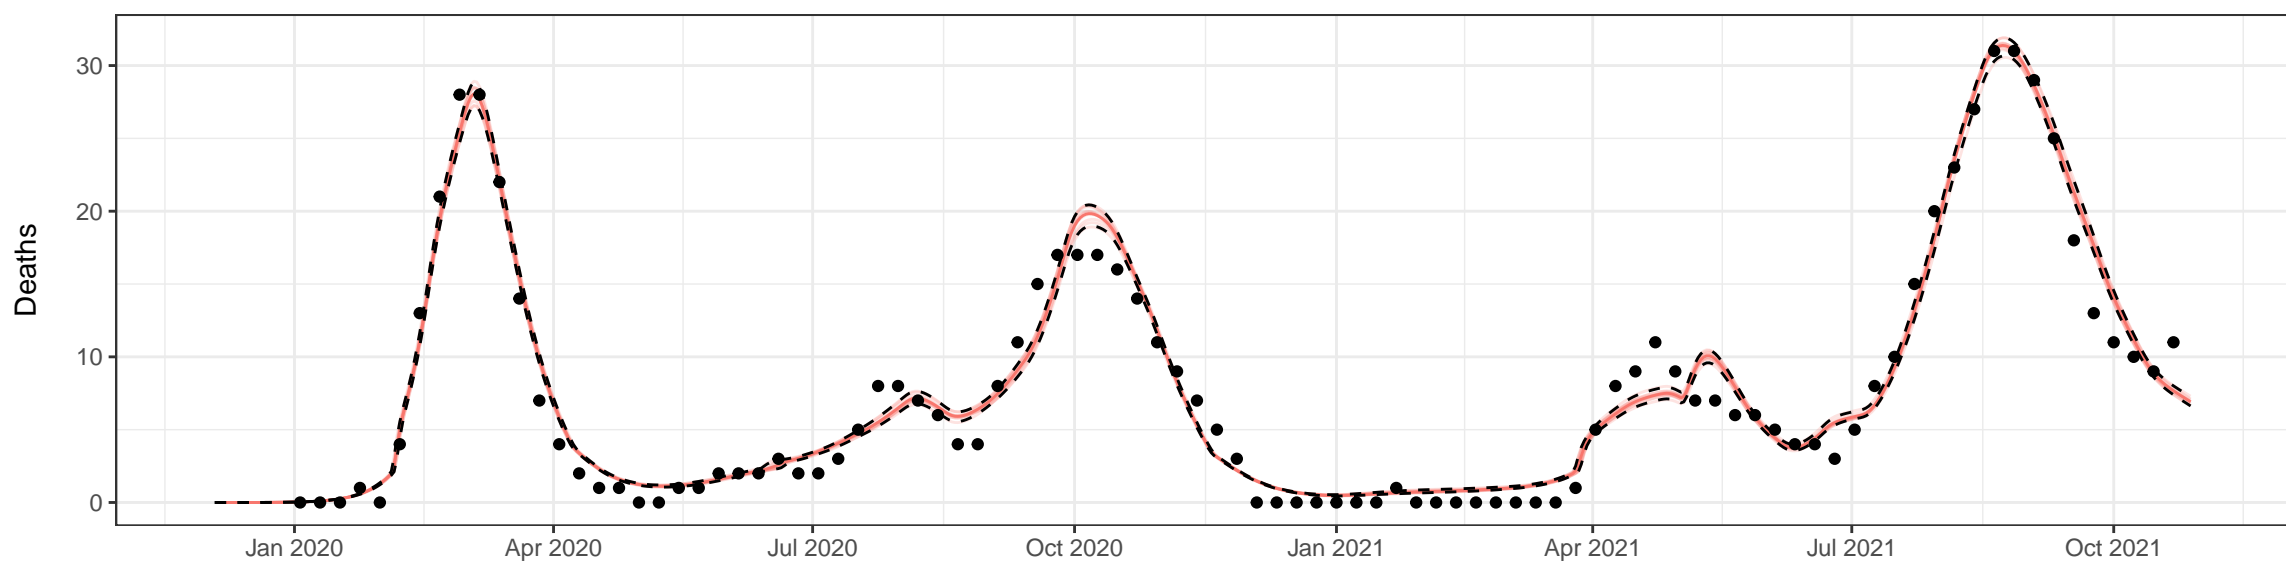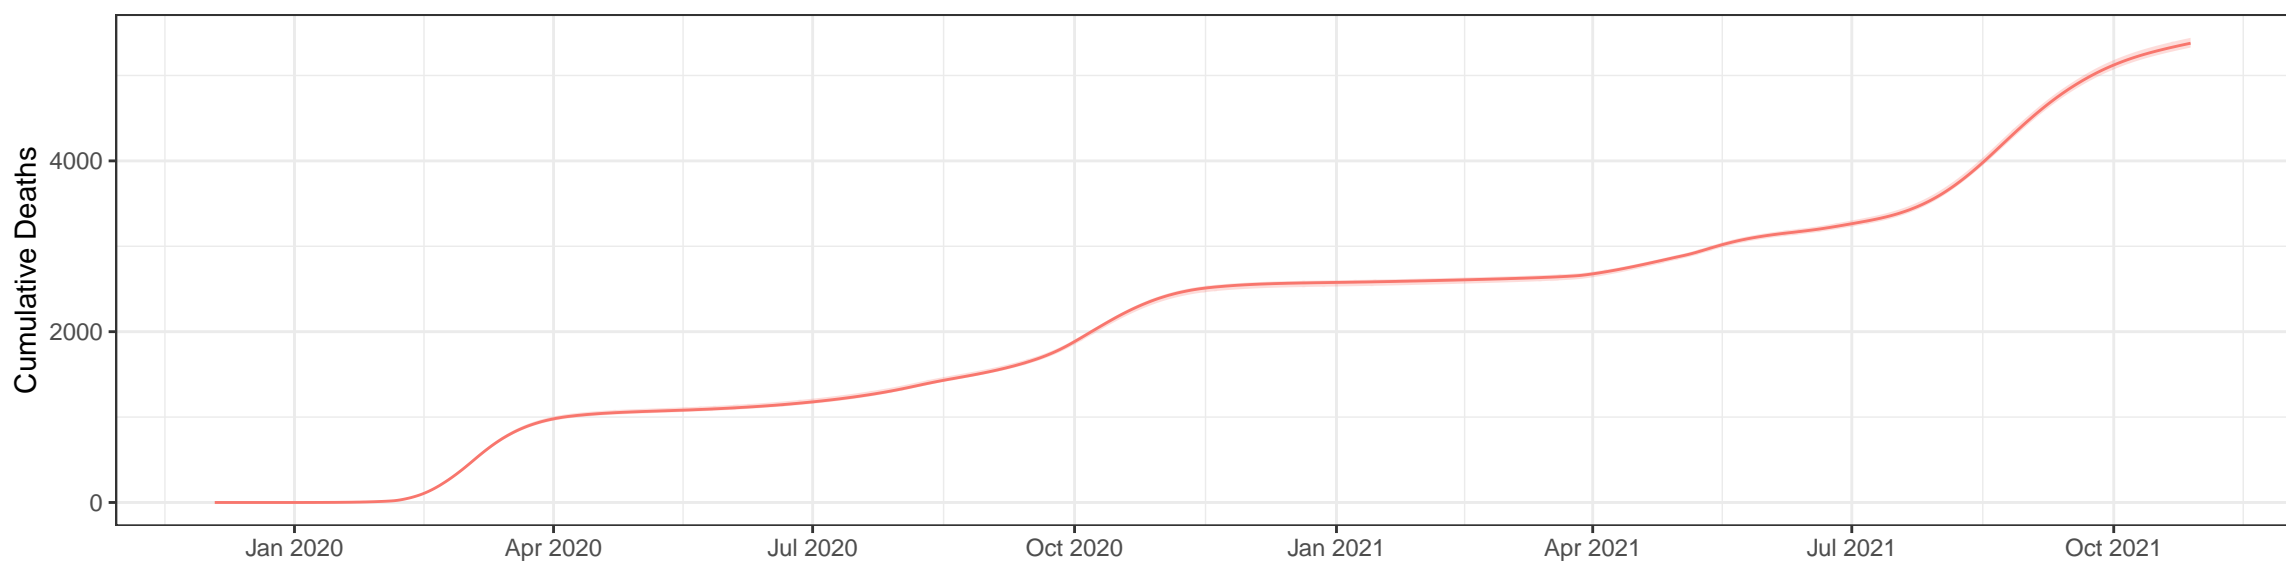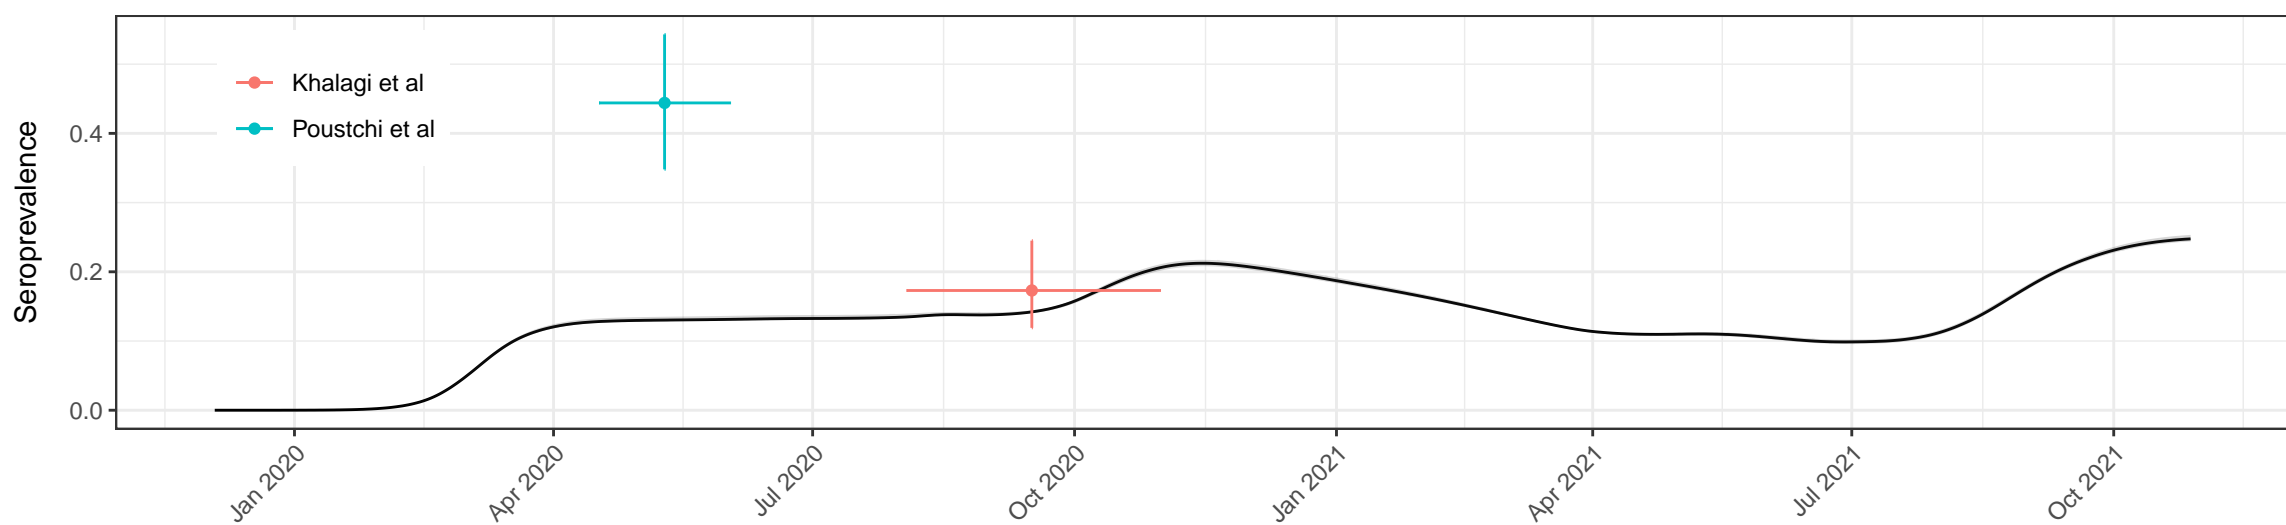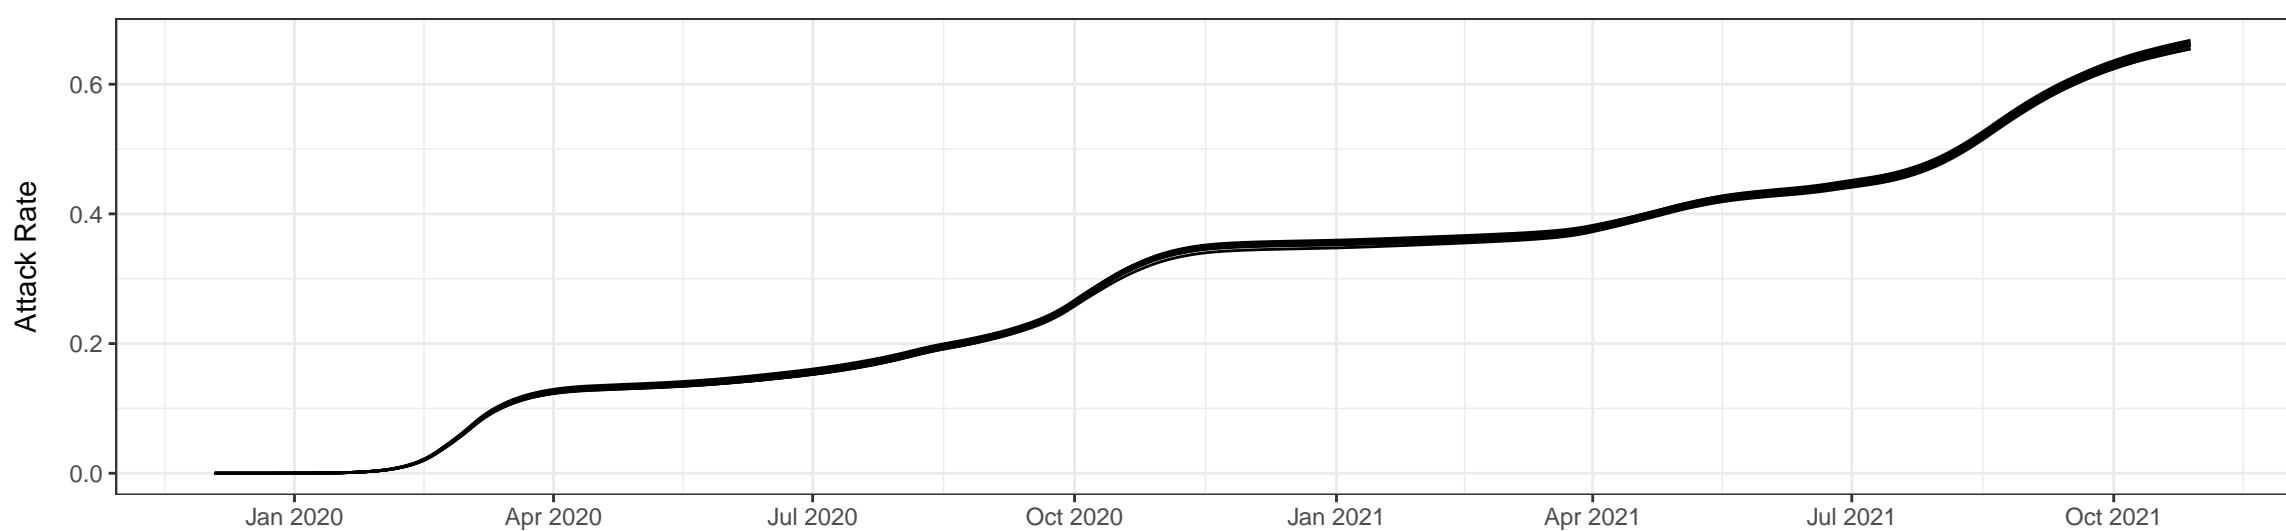

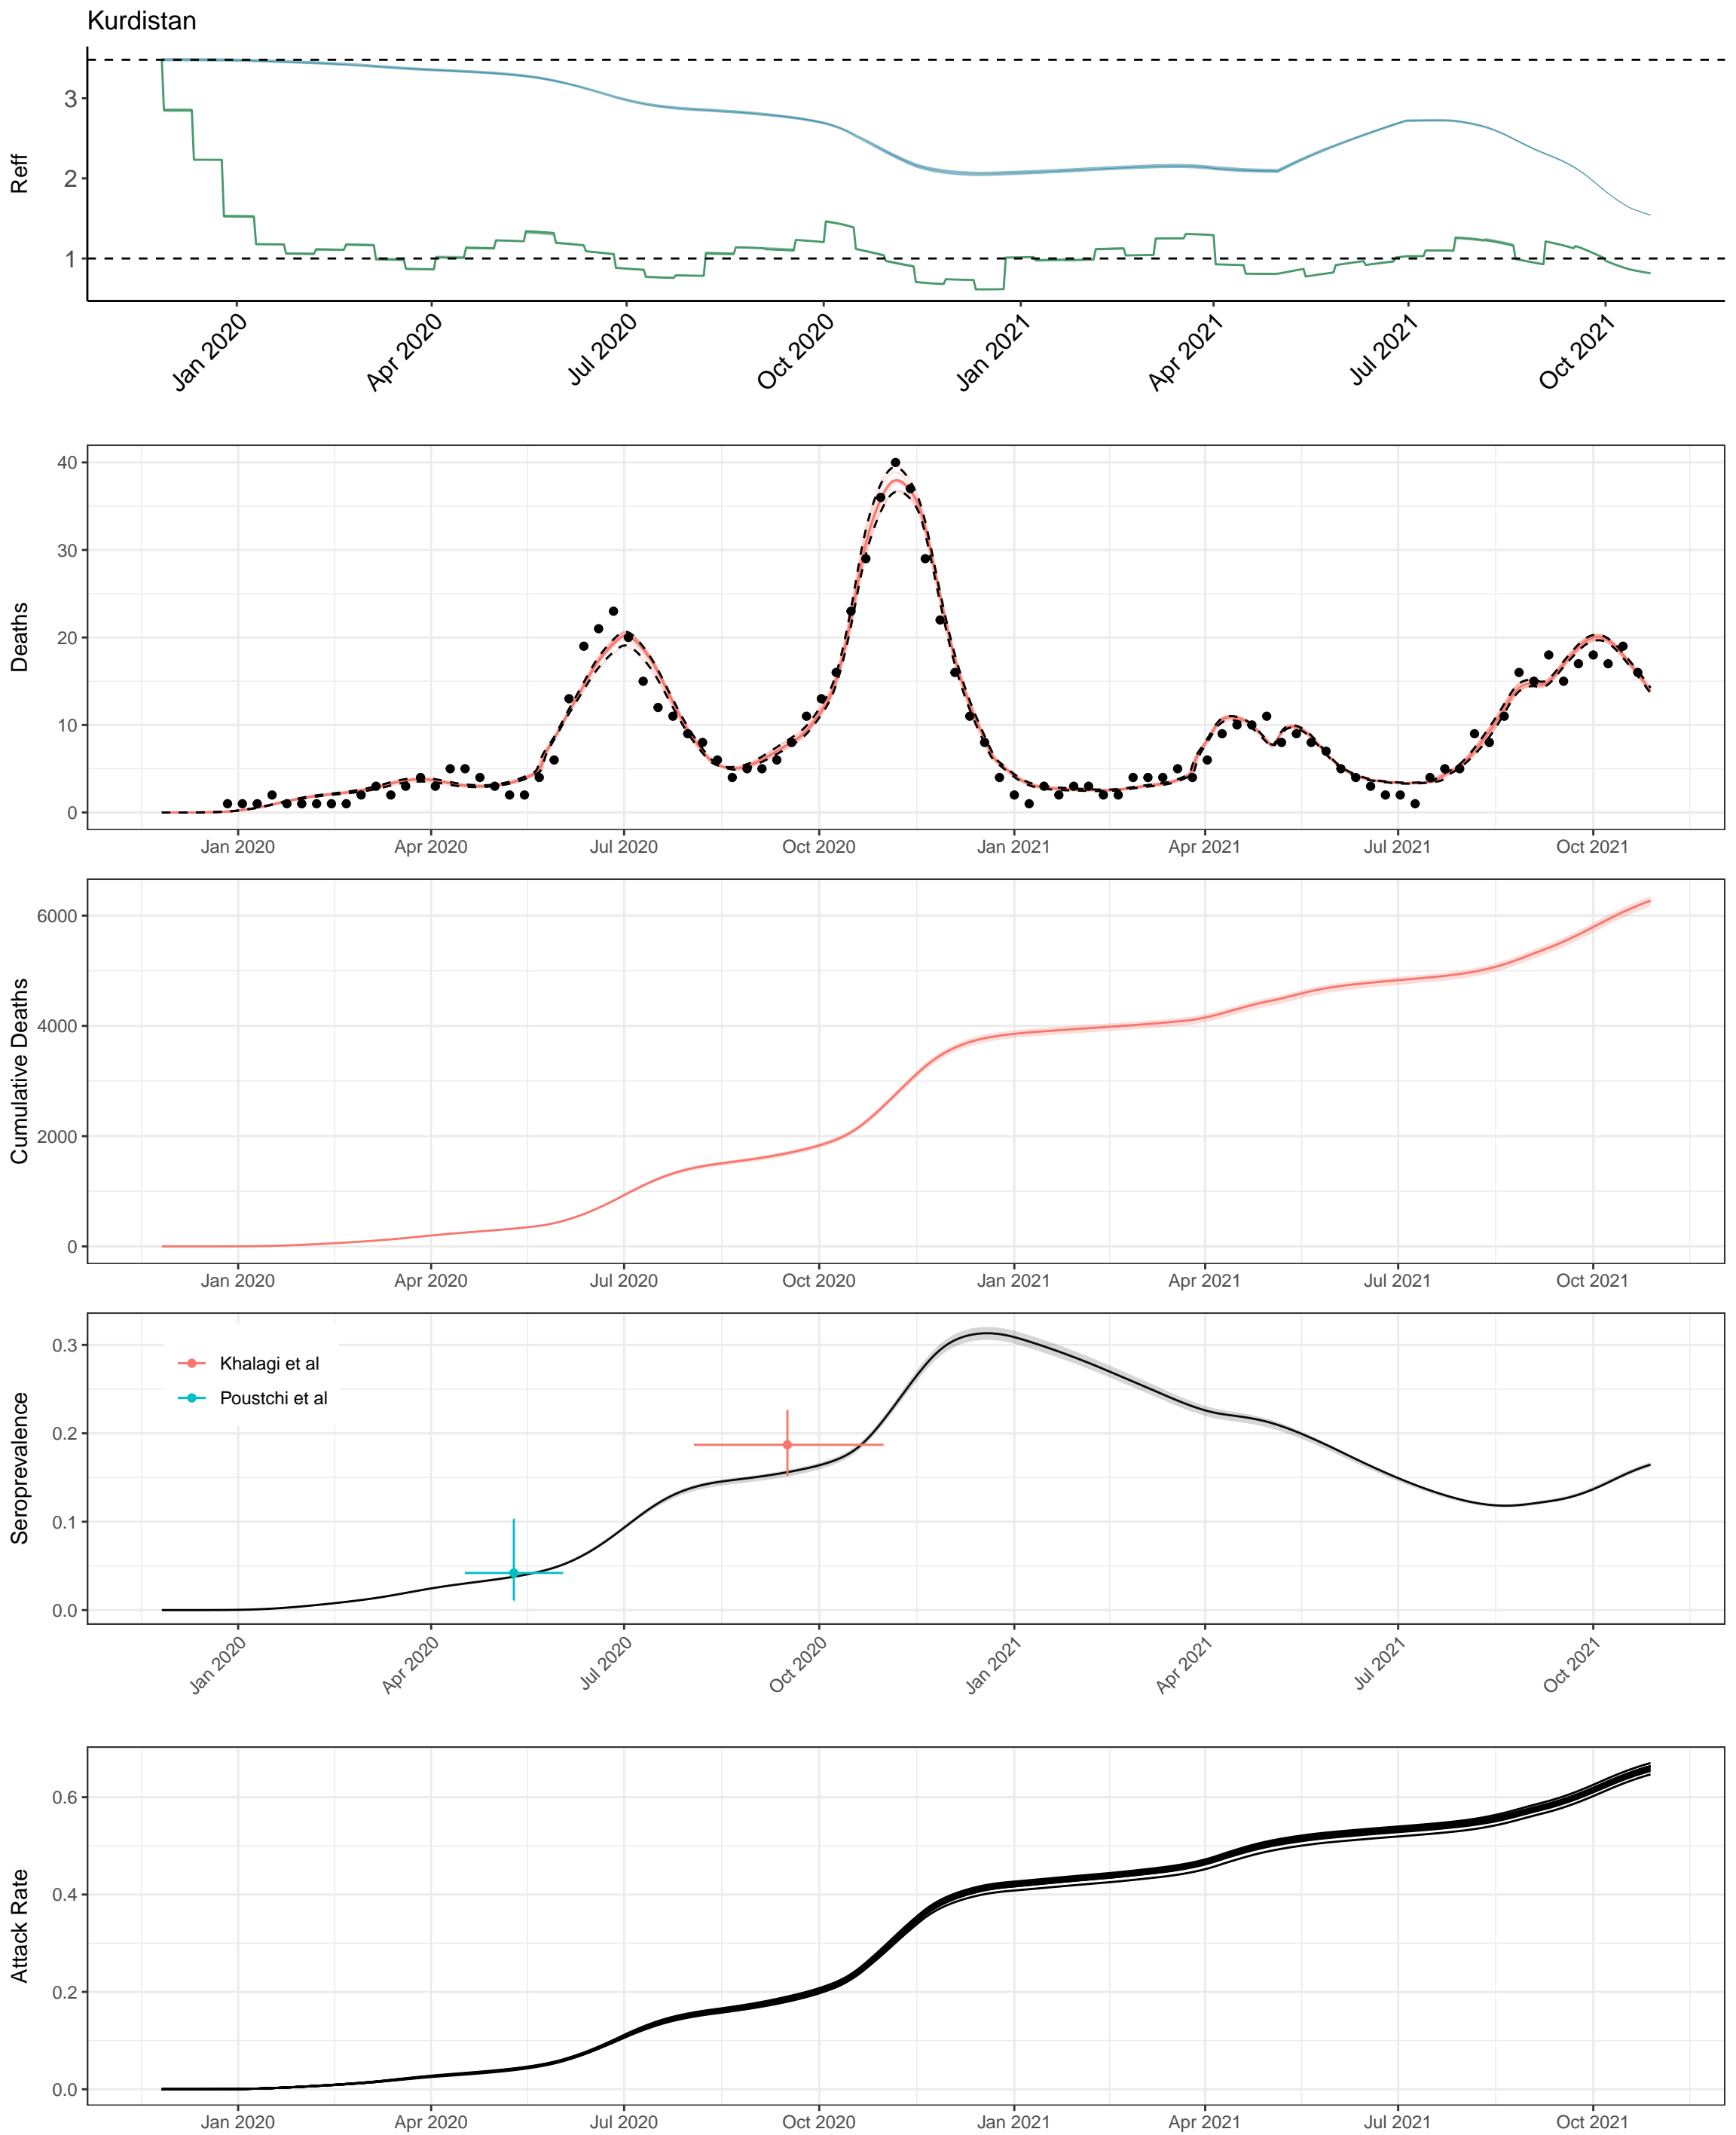

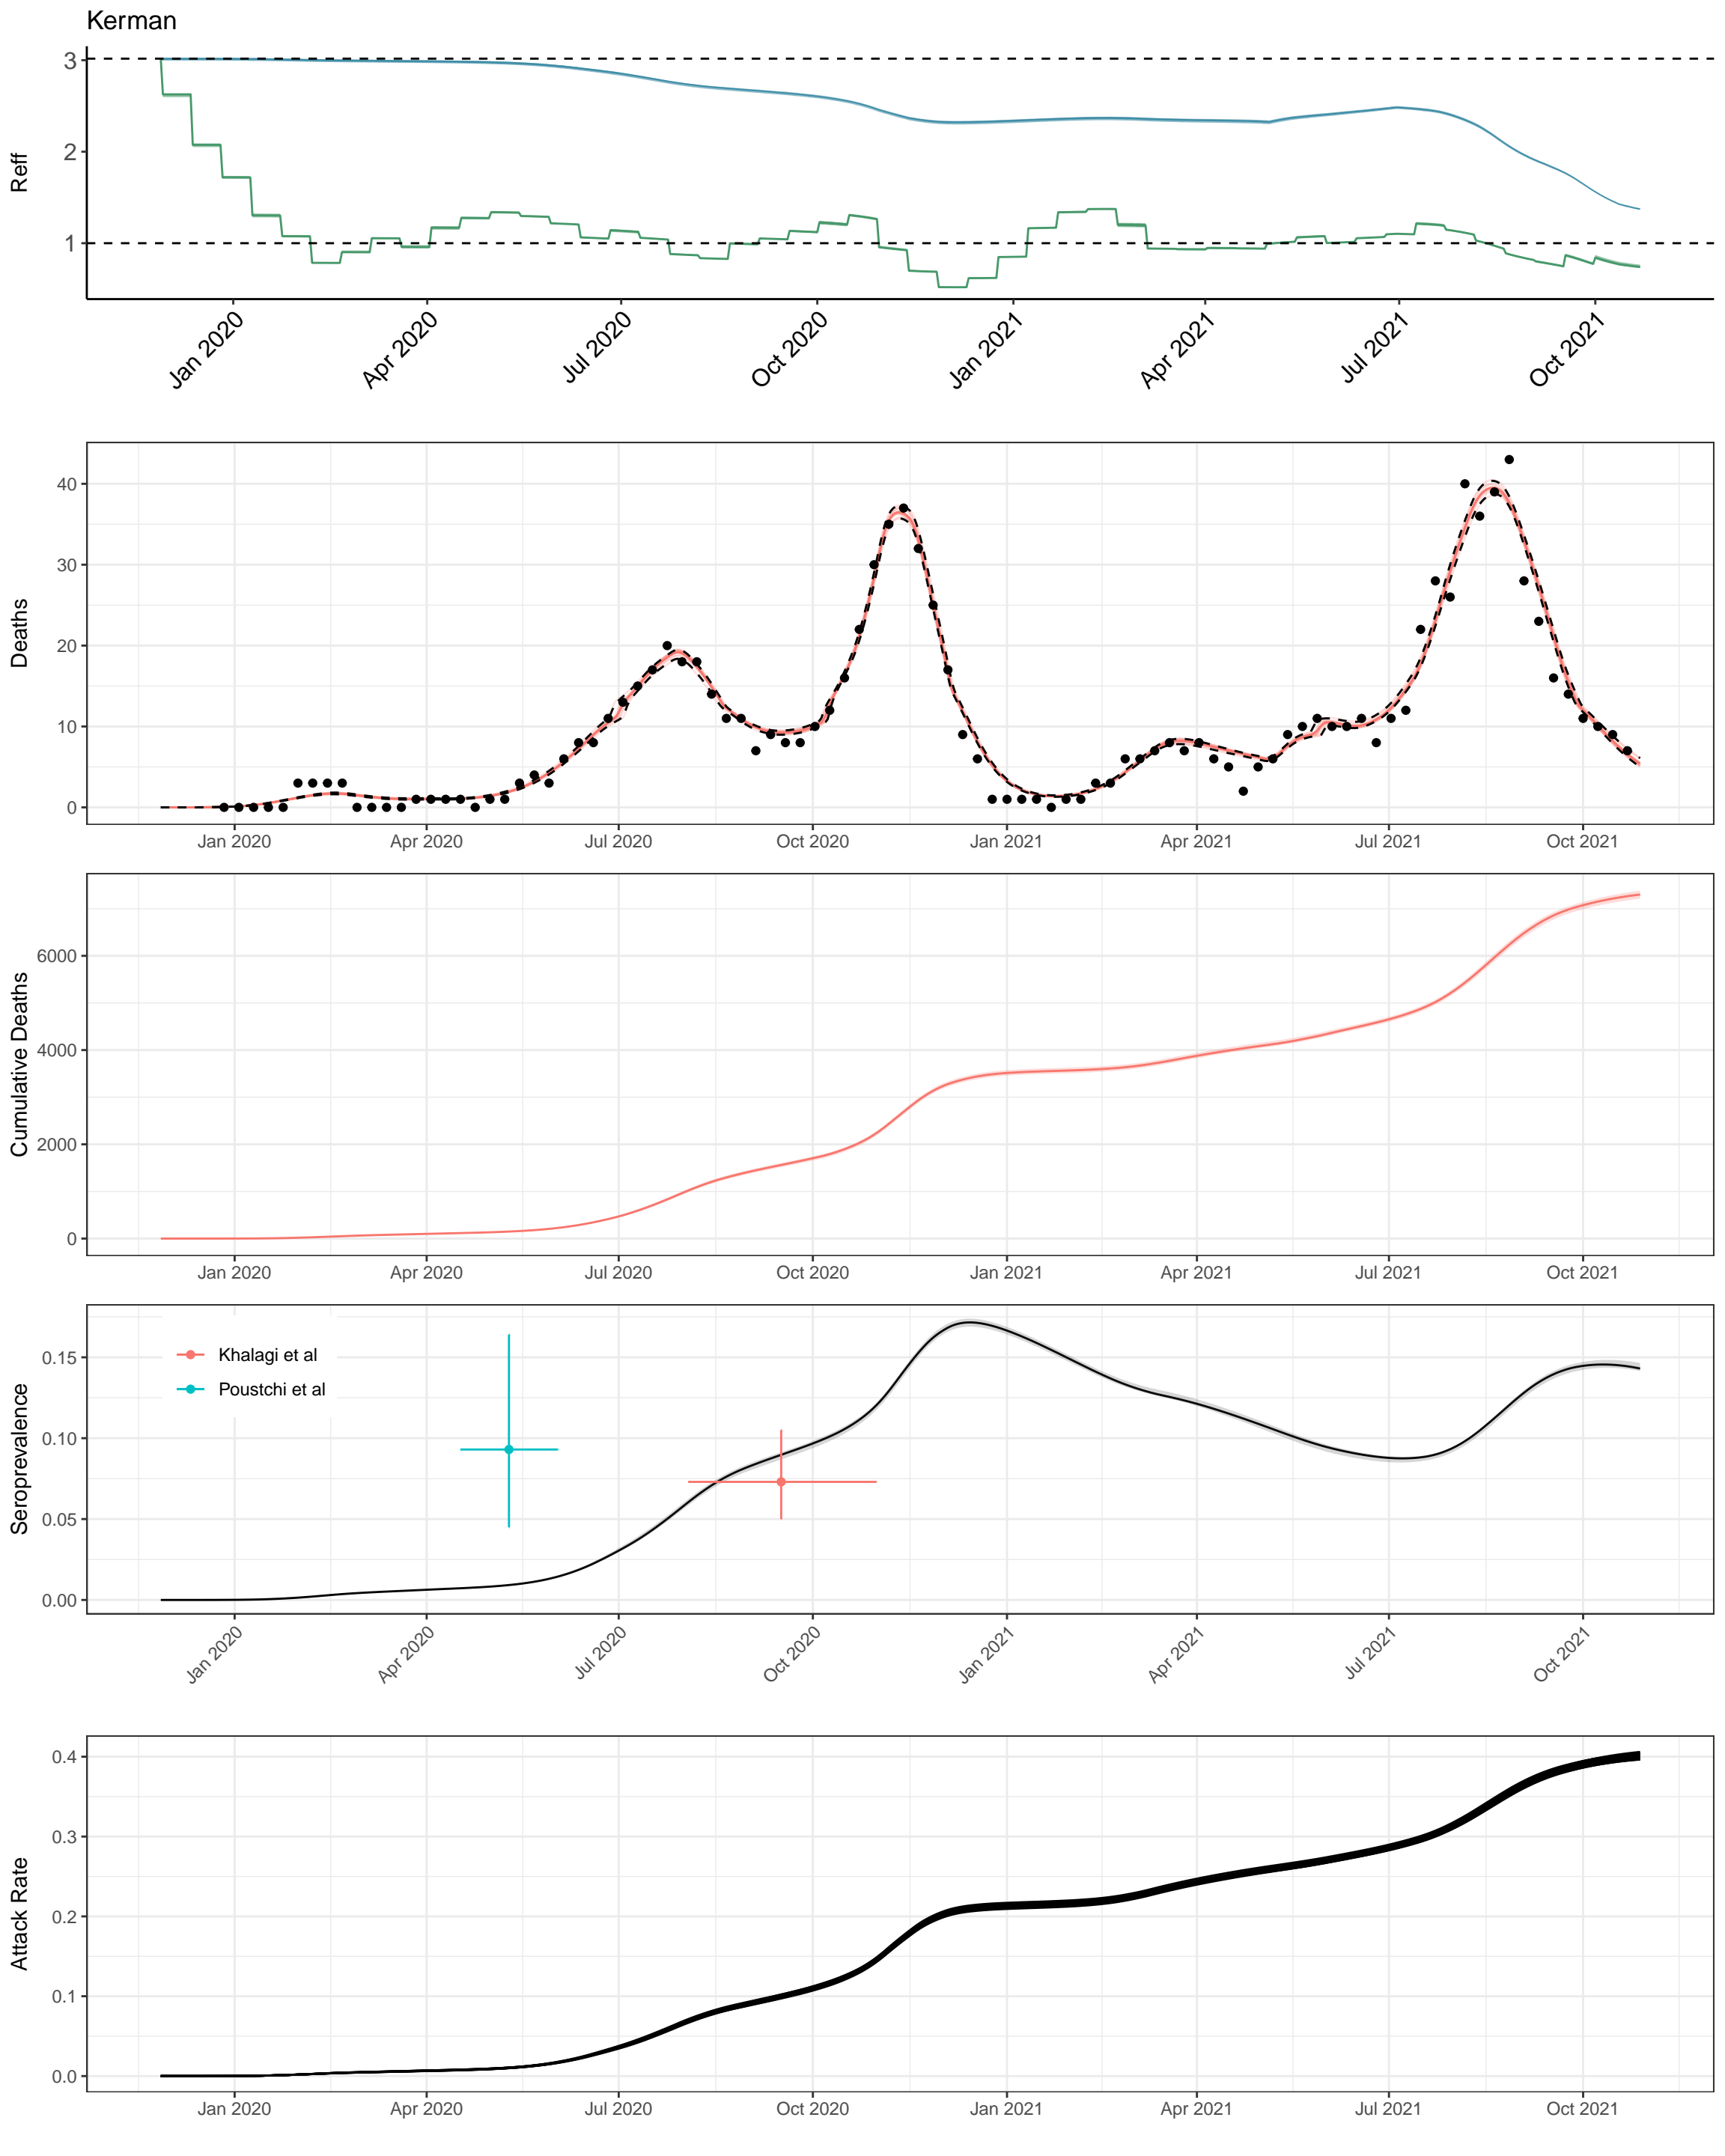

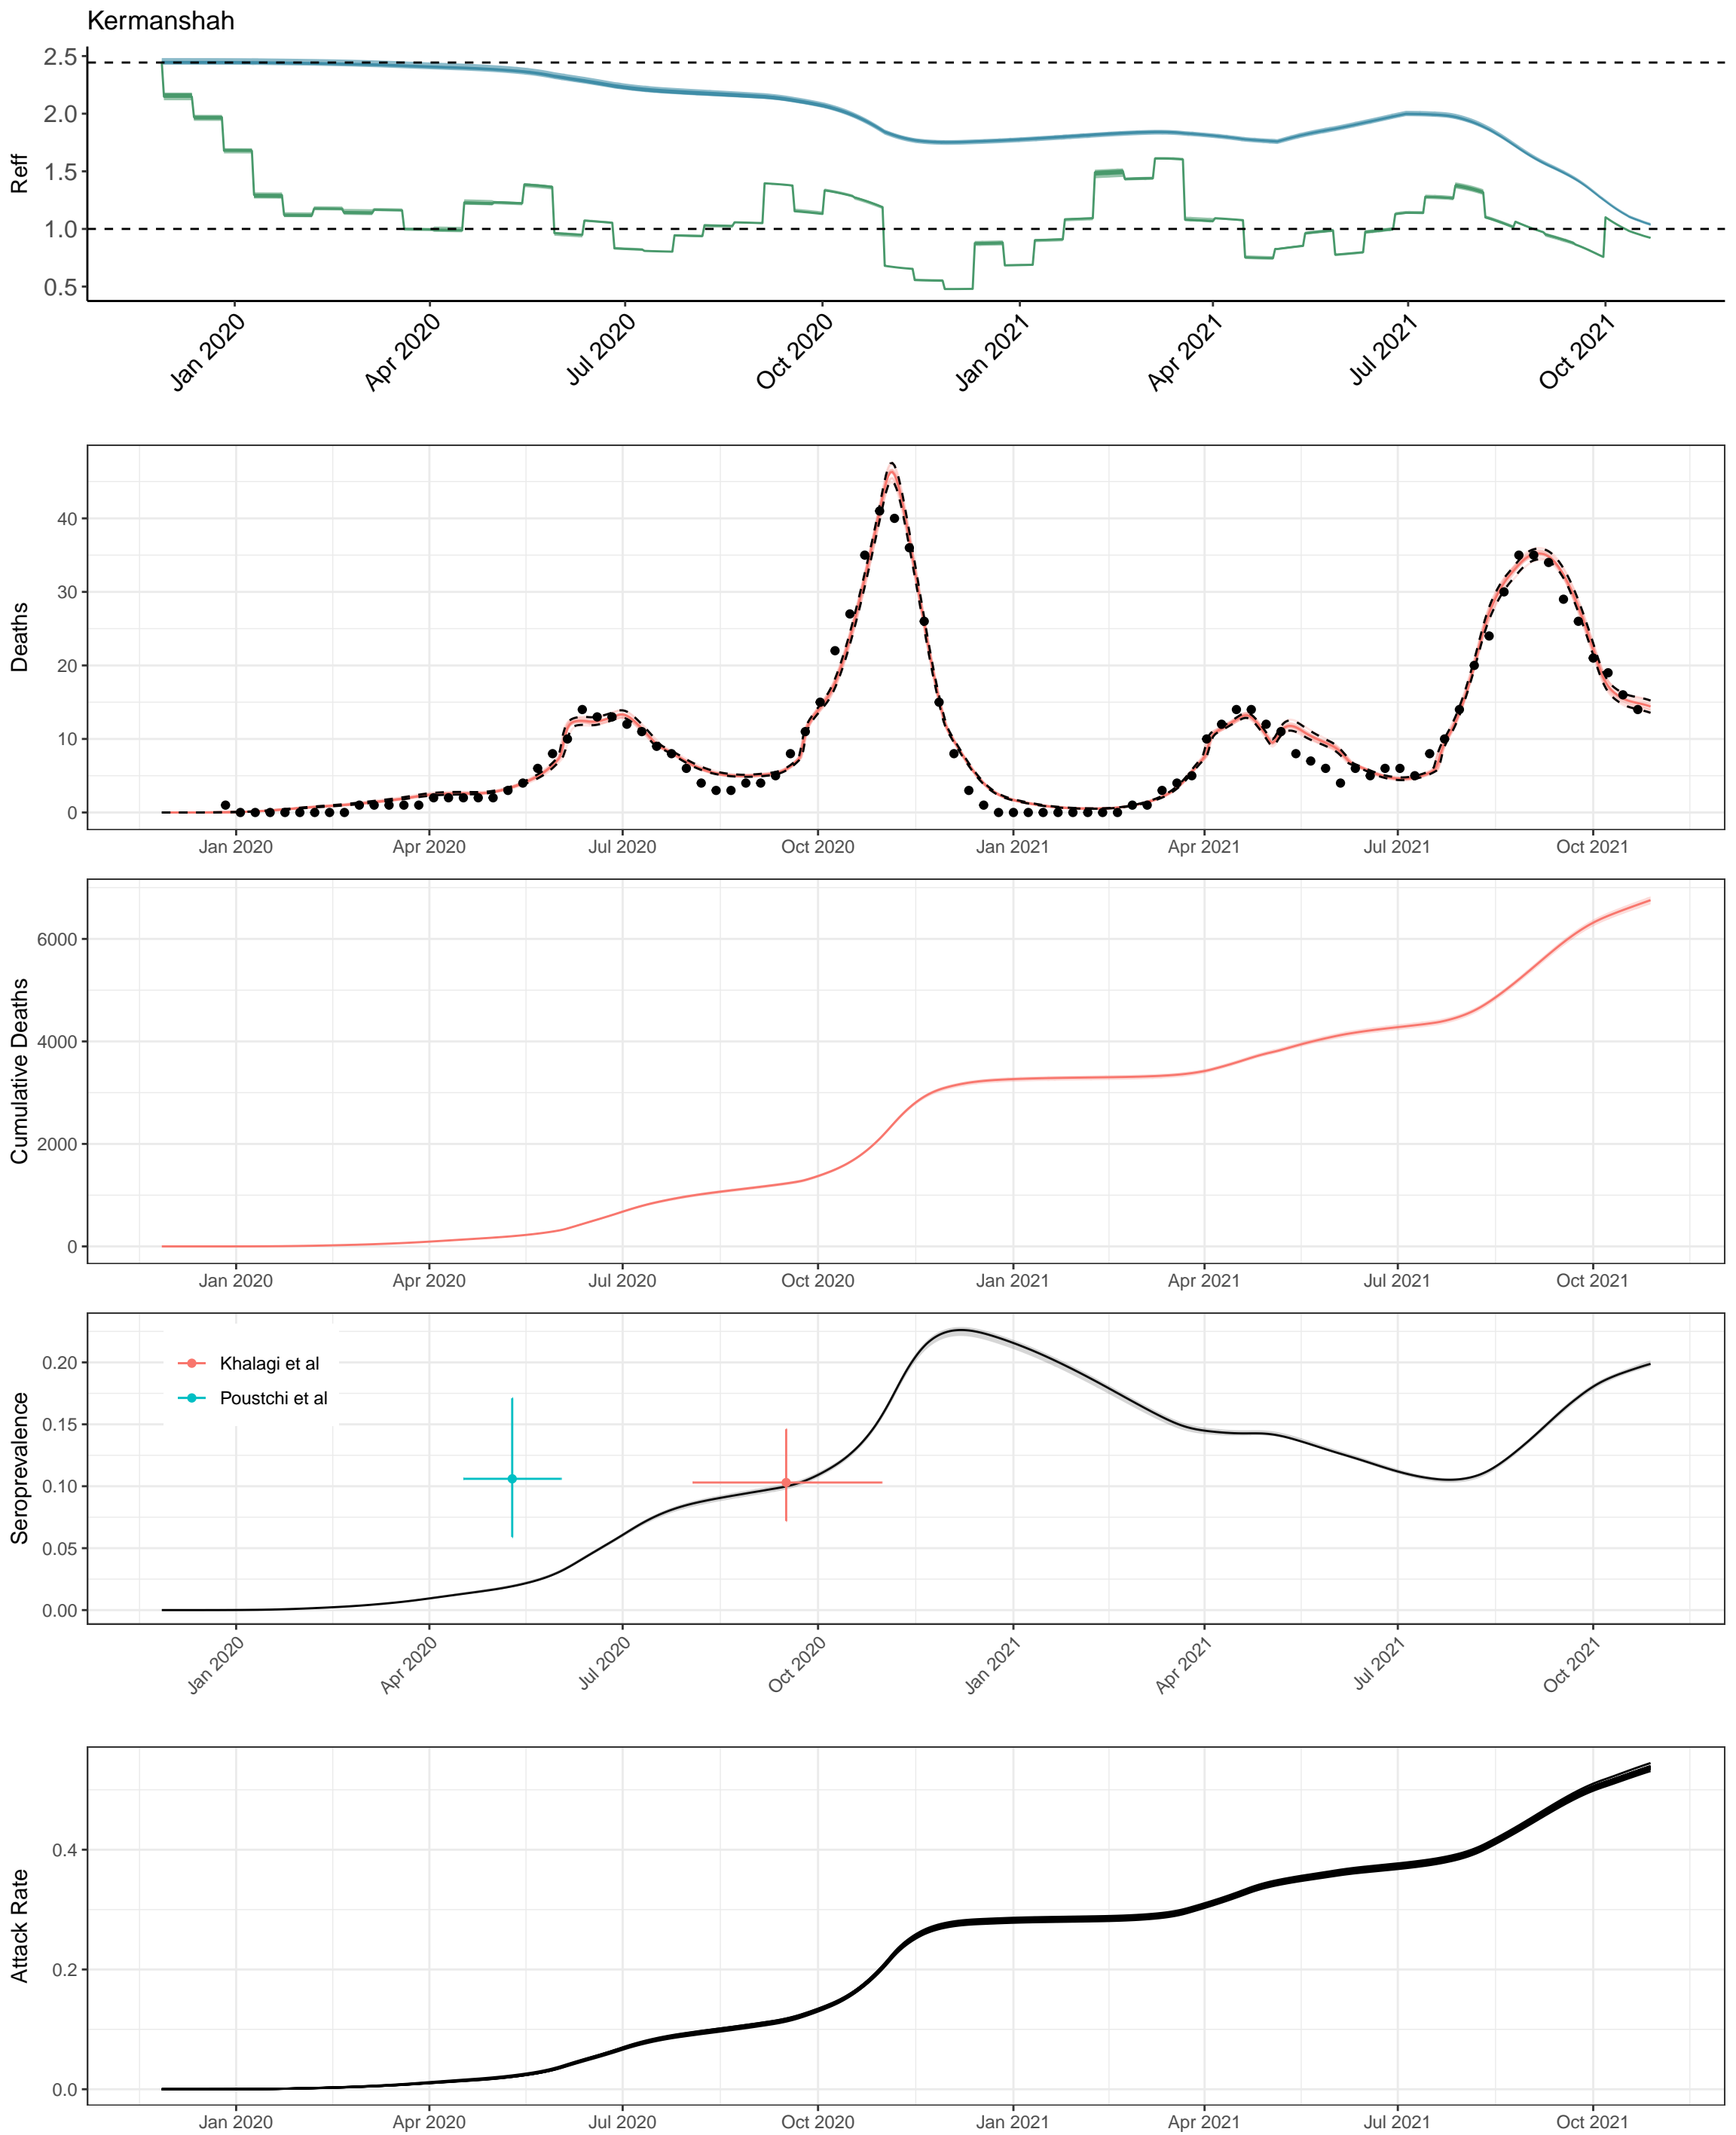

Kohgiluyeh and Boyer-Ahmad

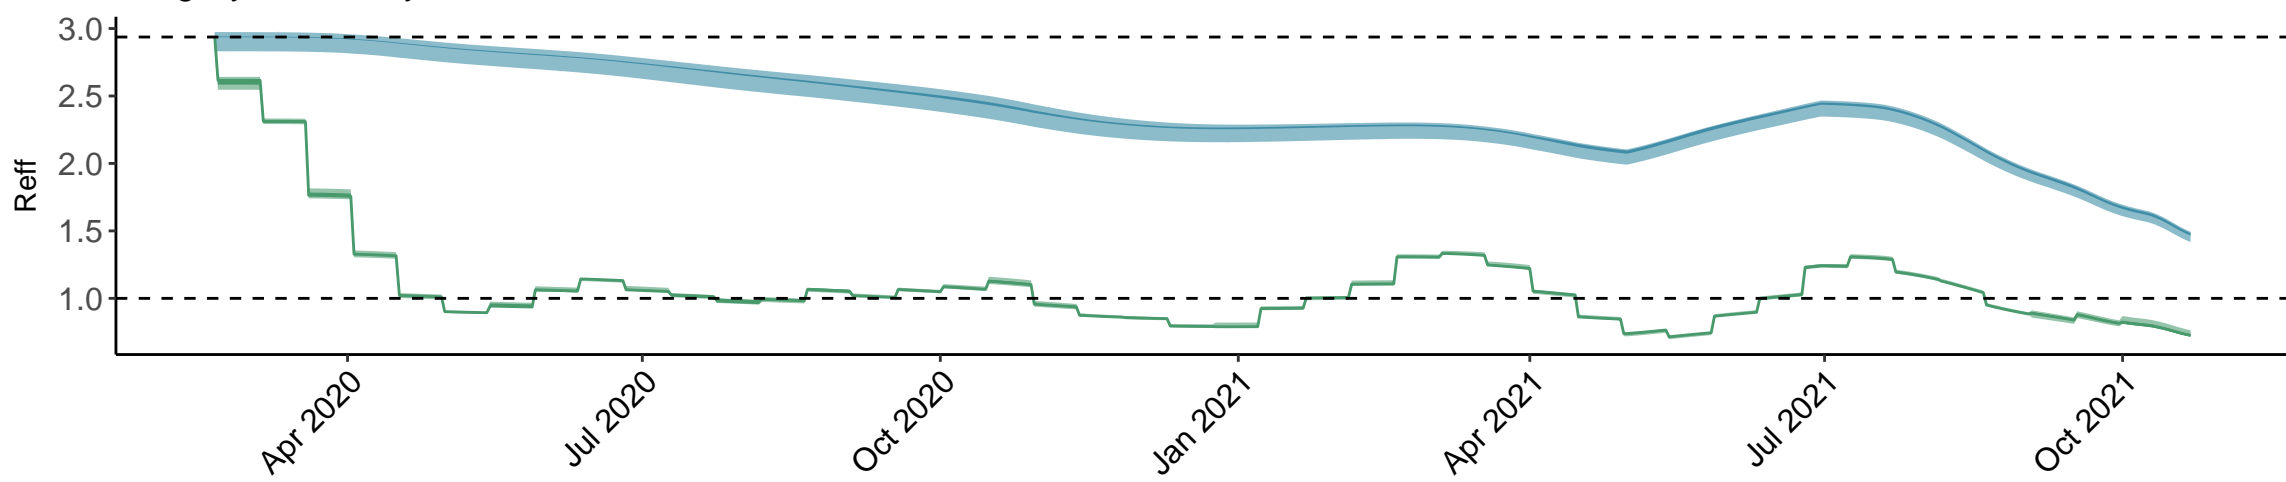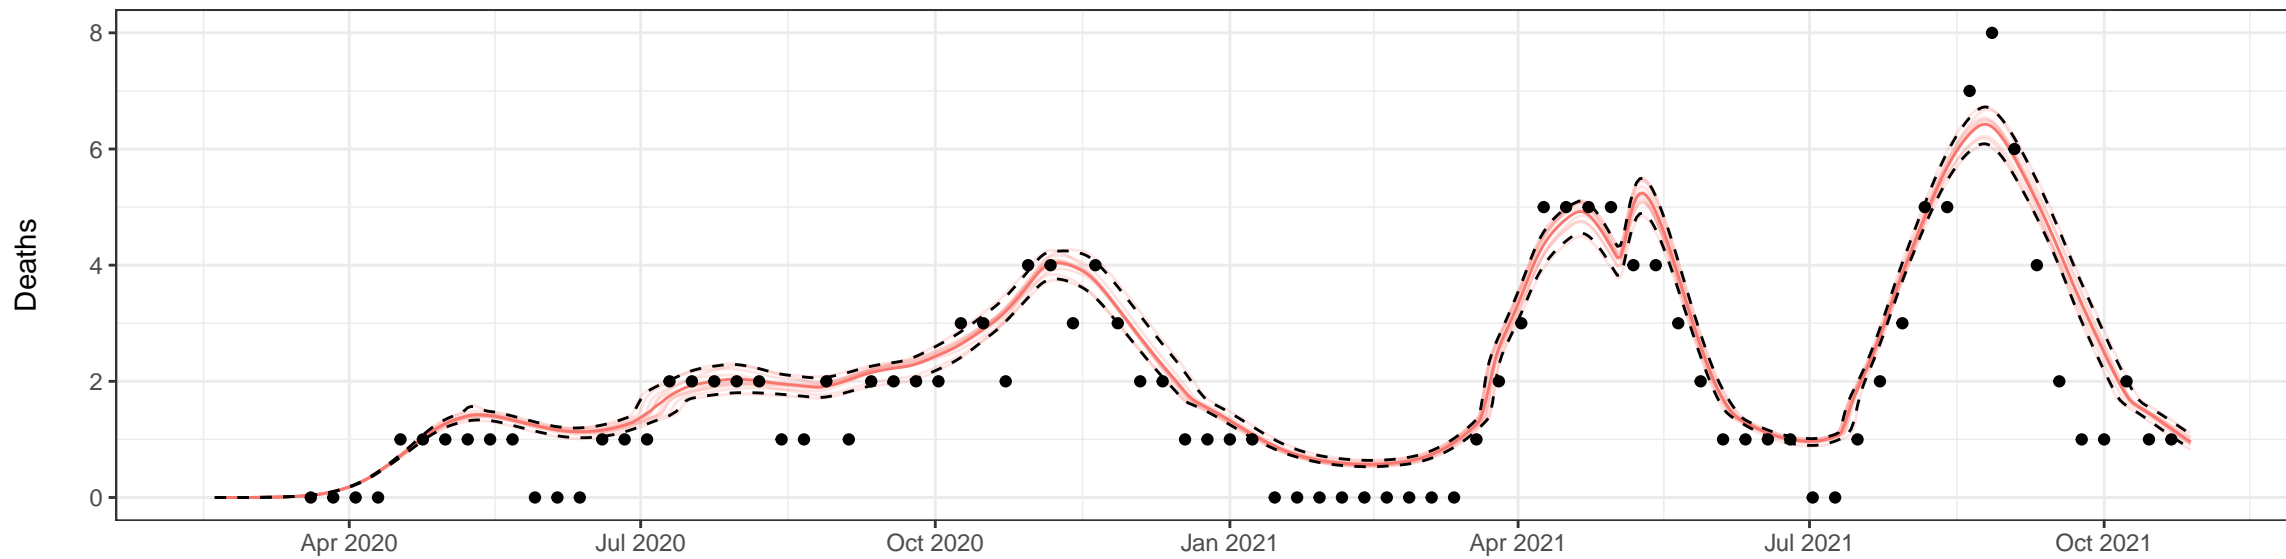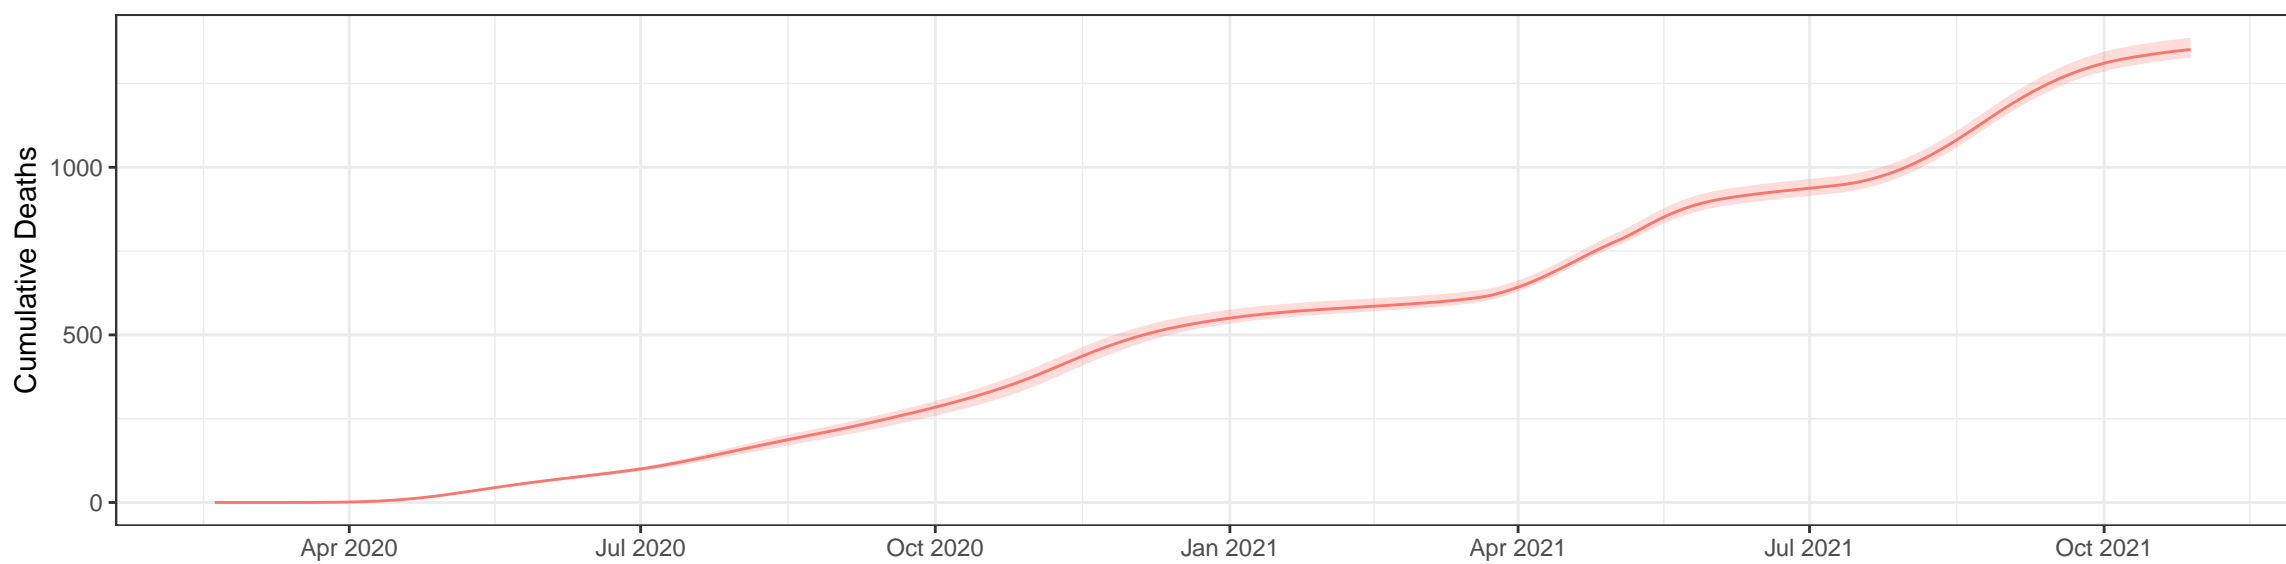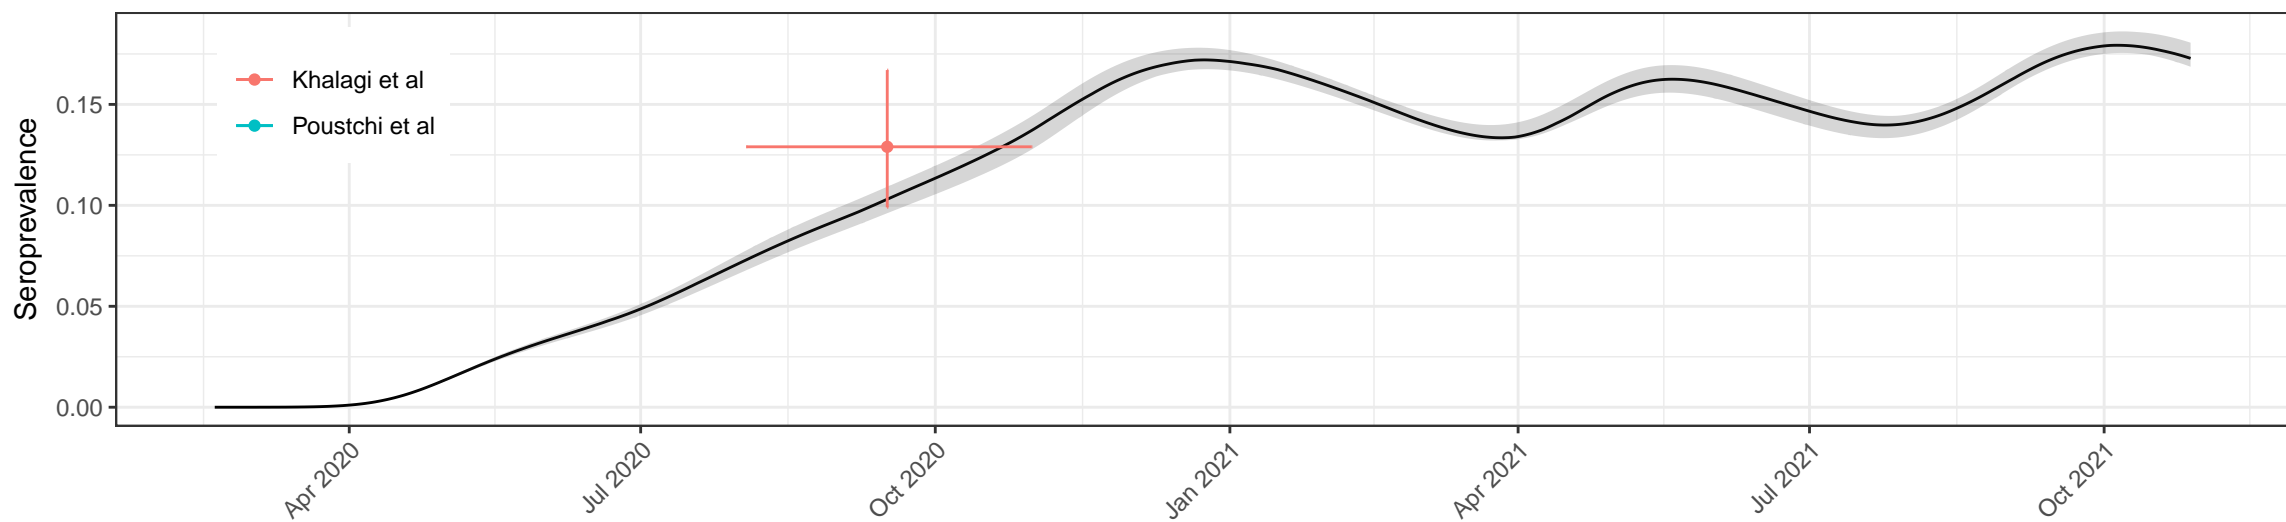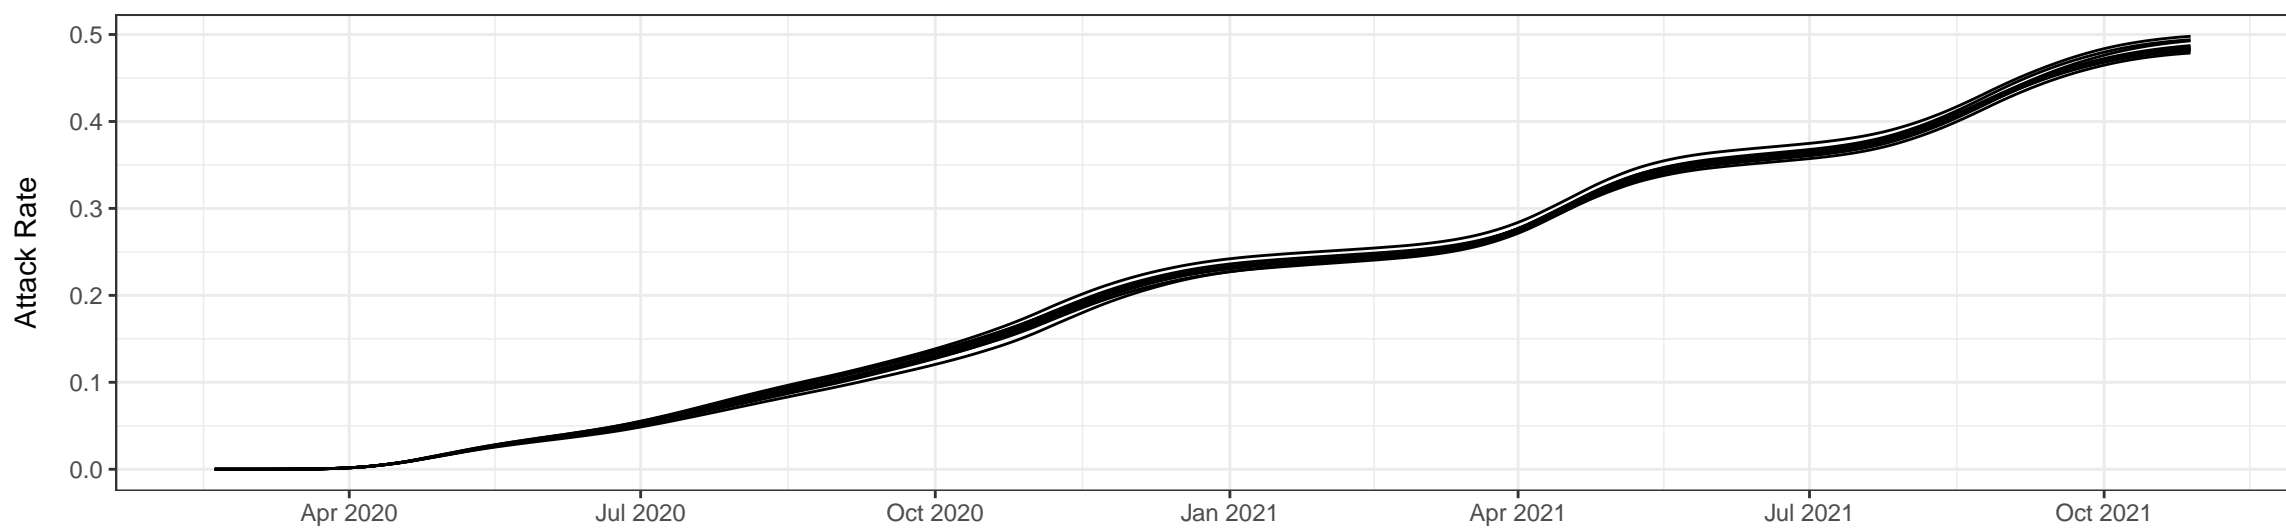

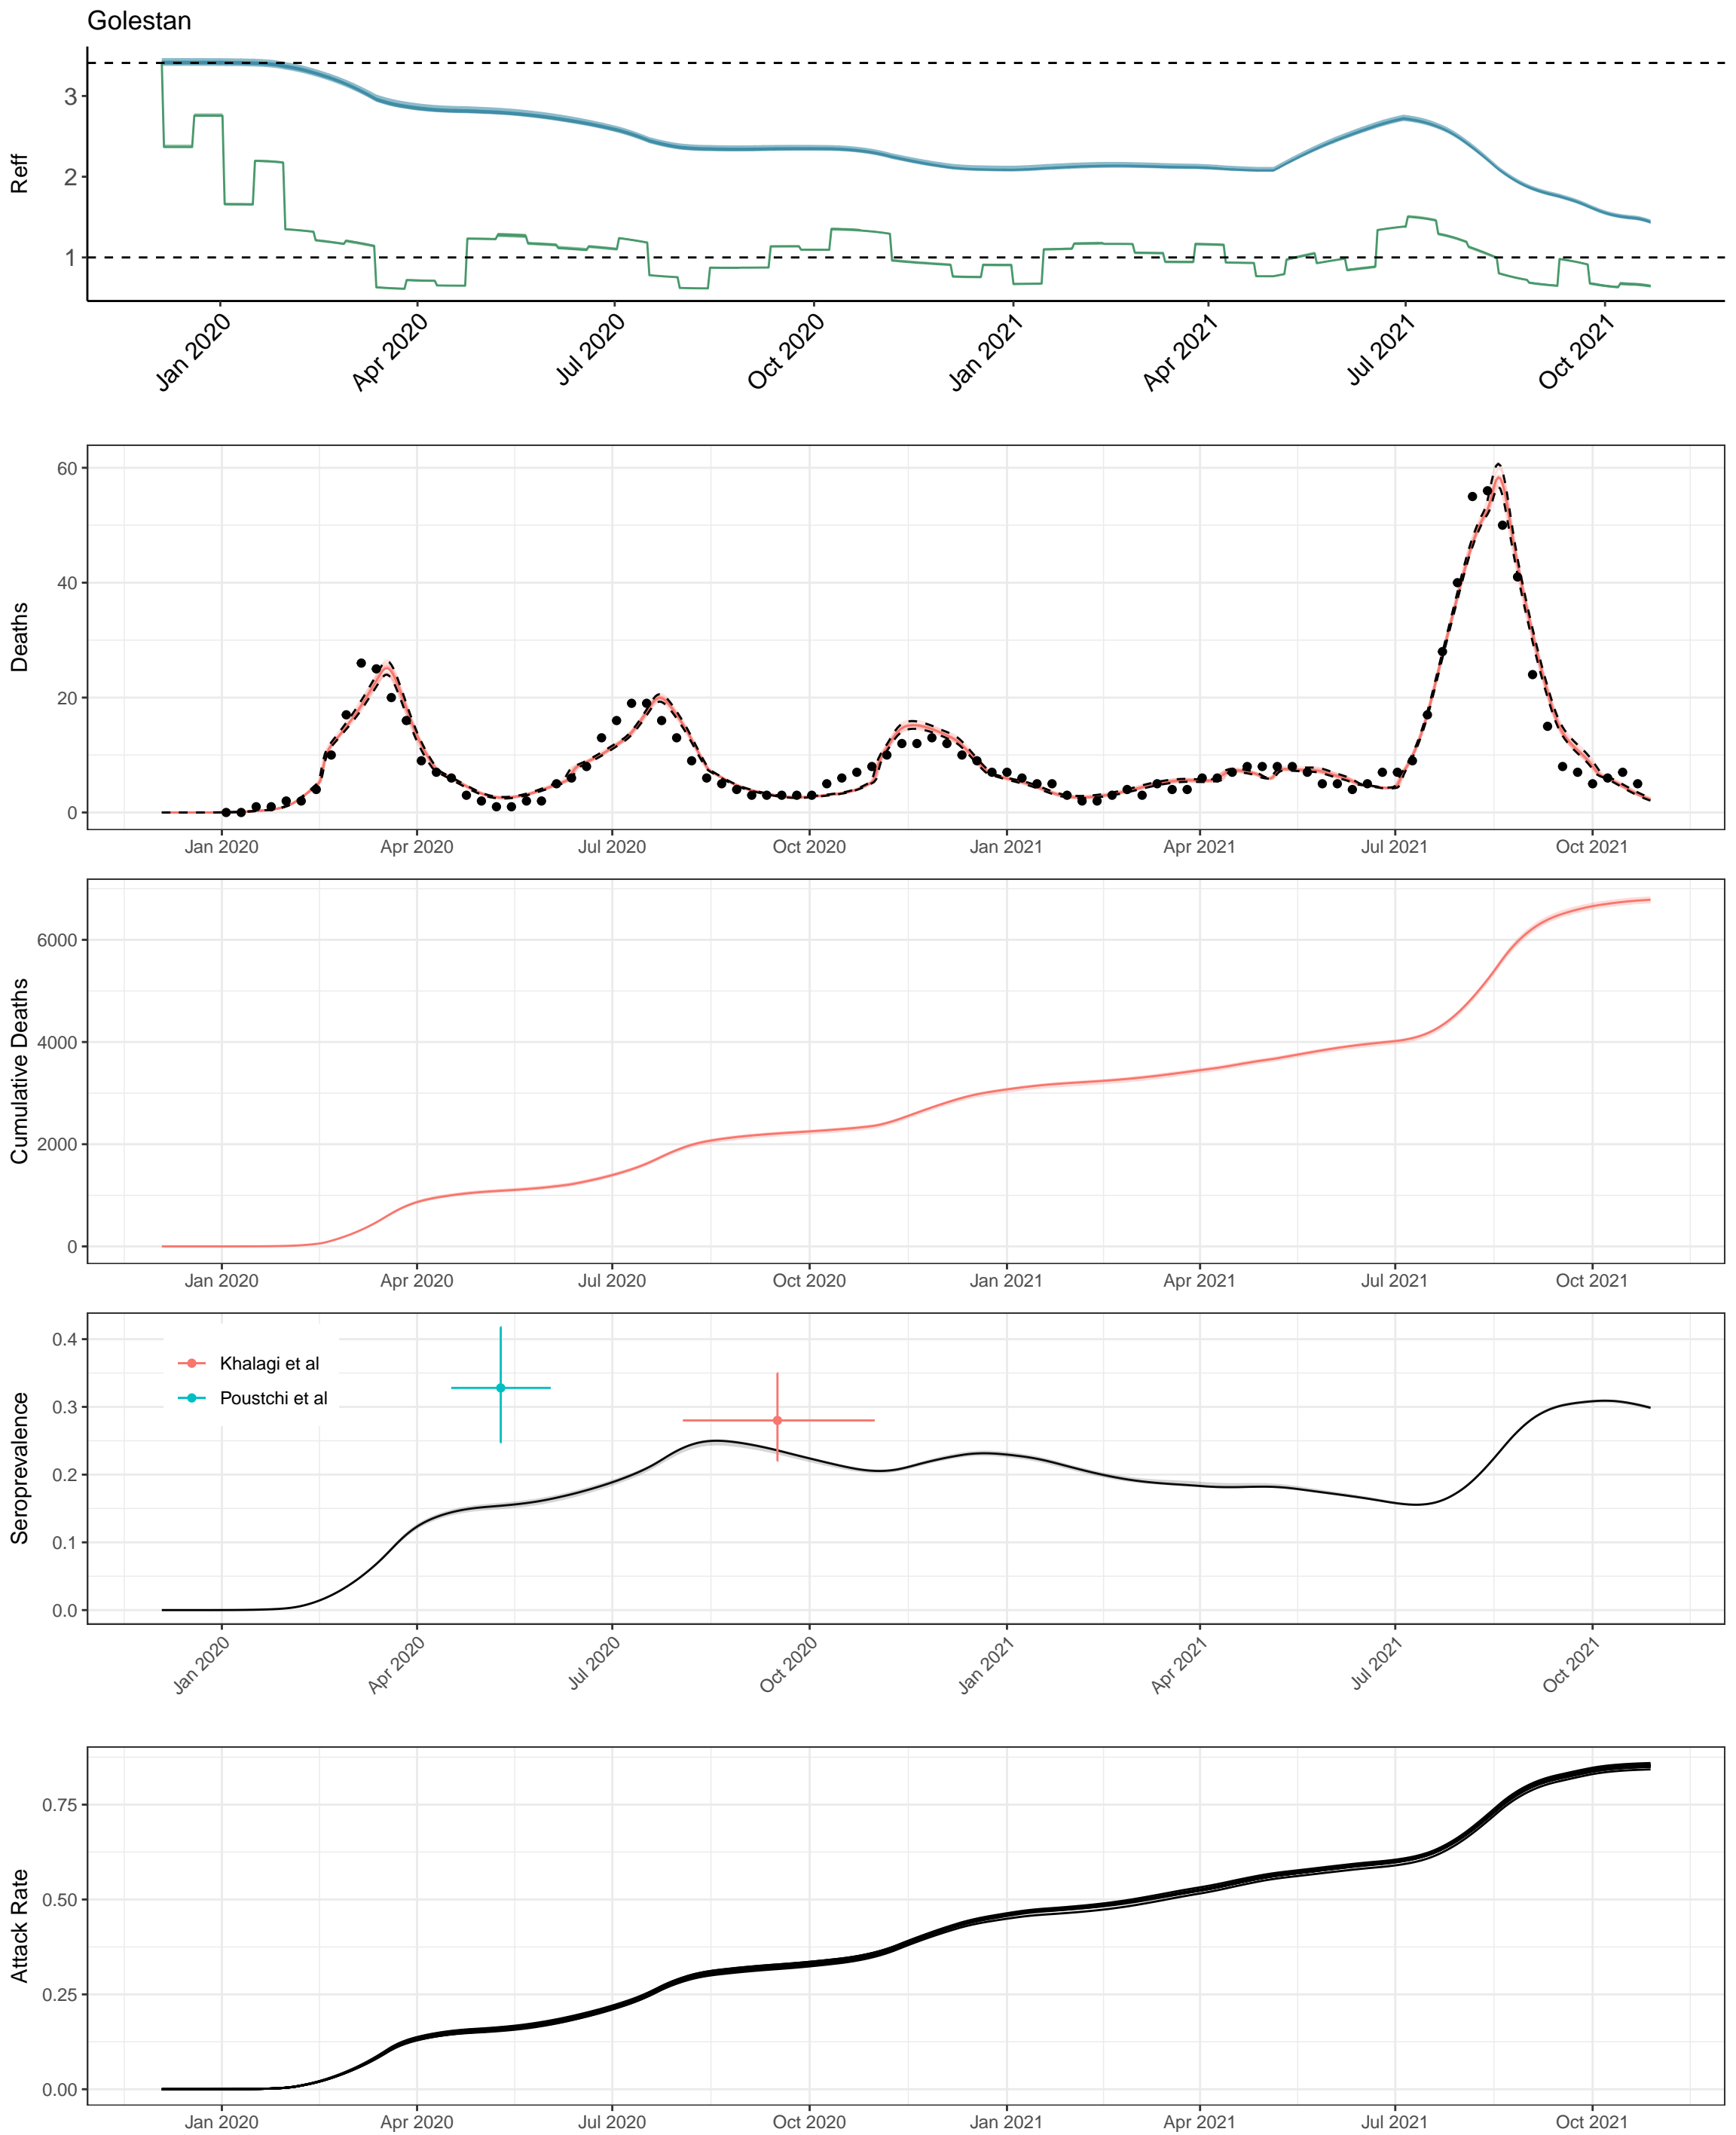



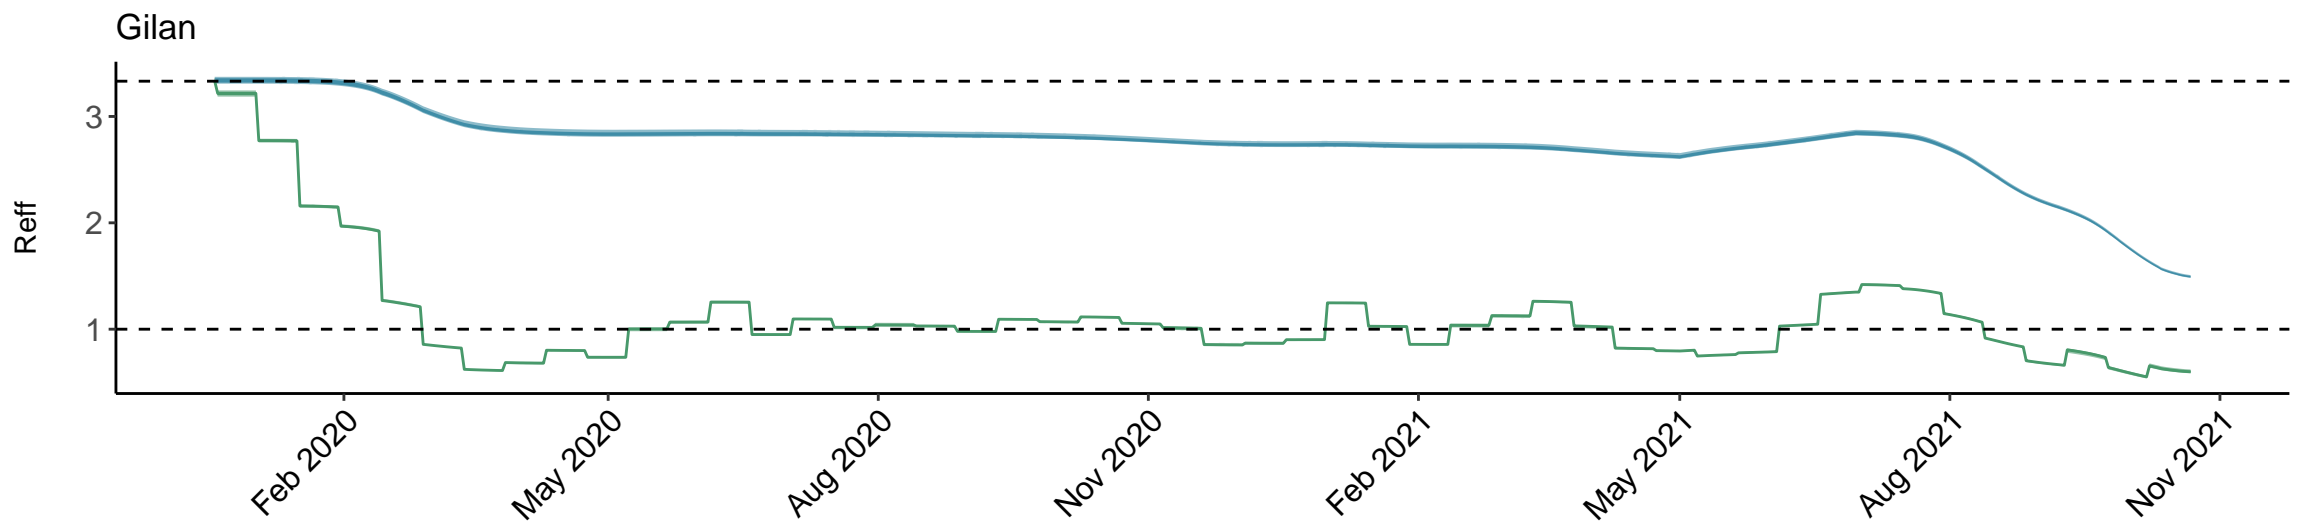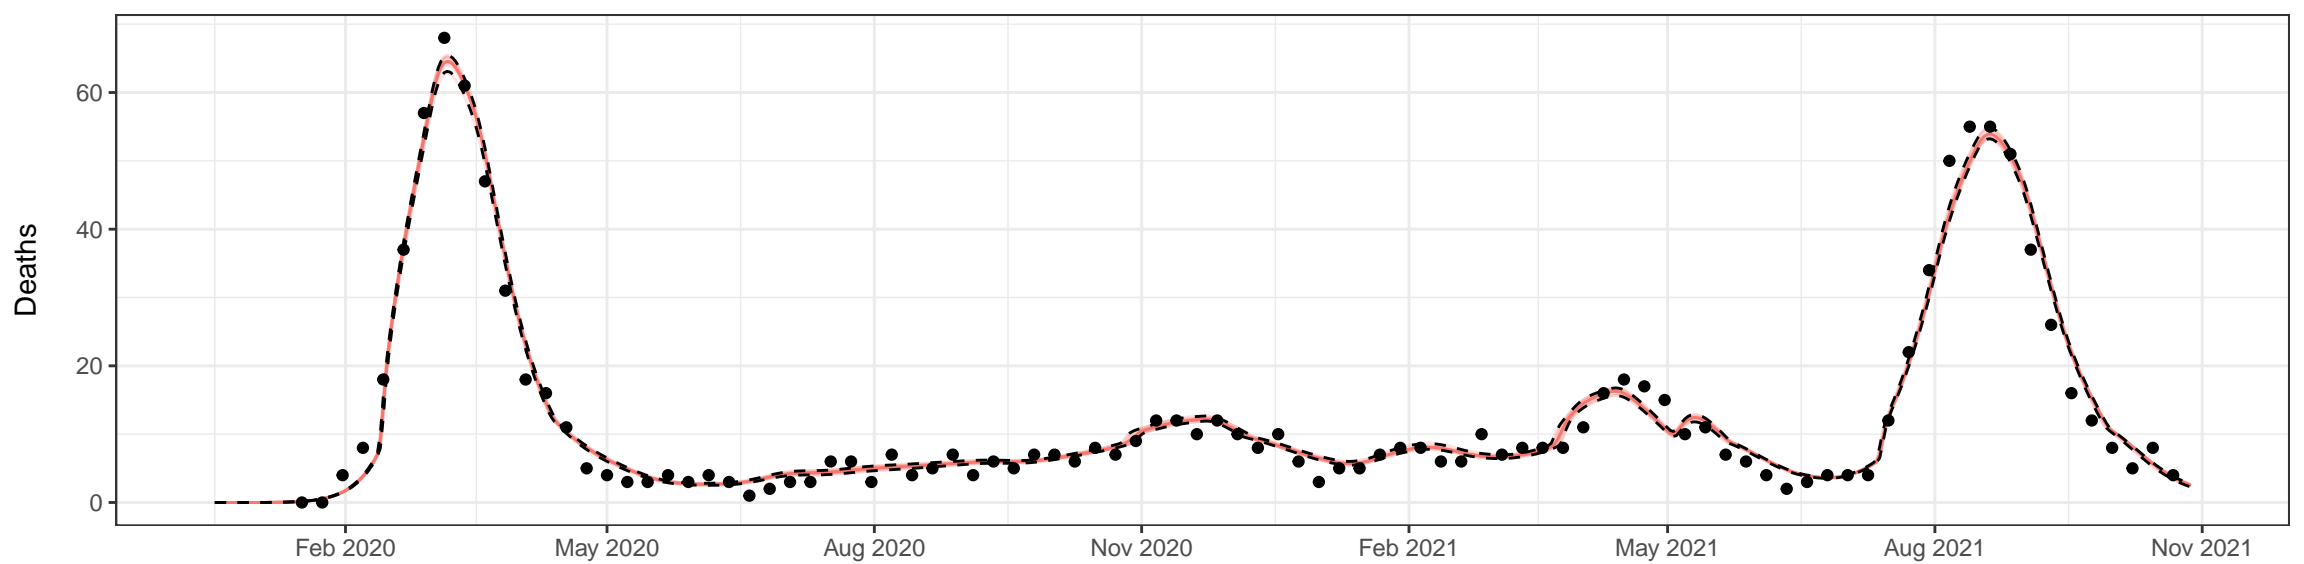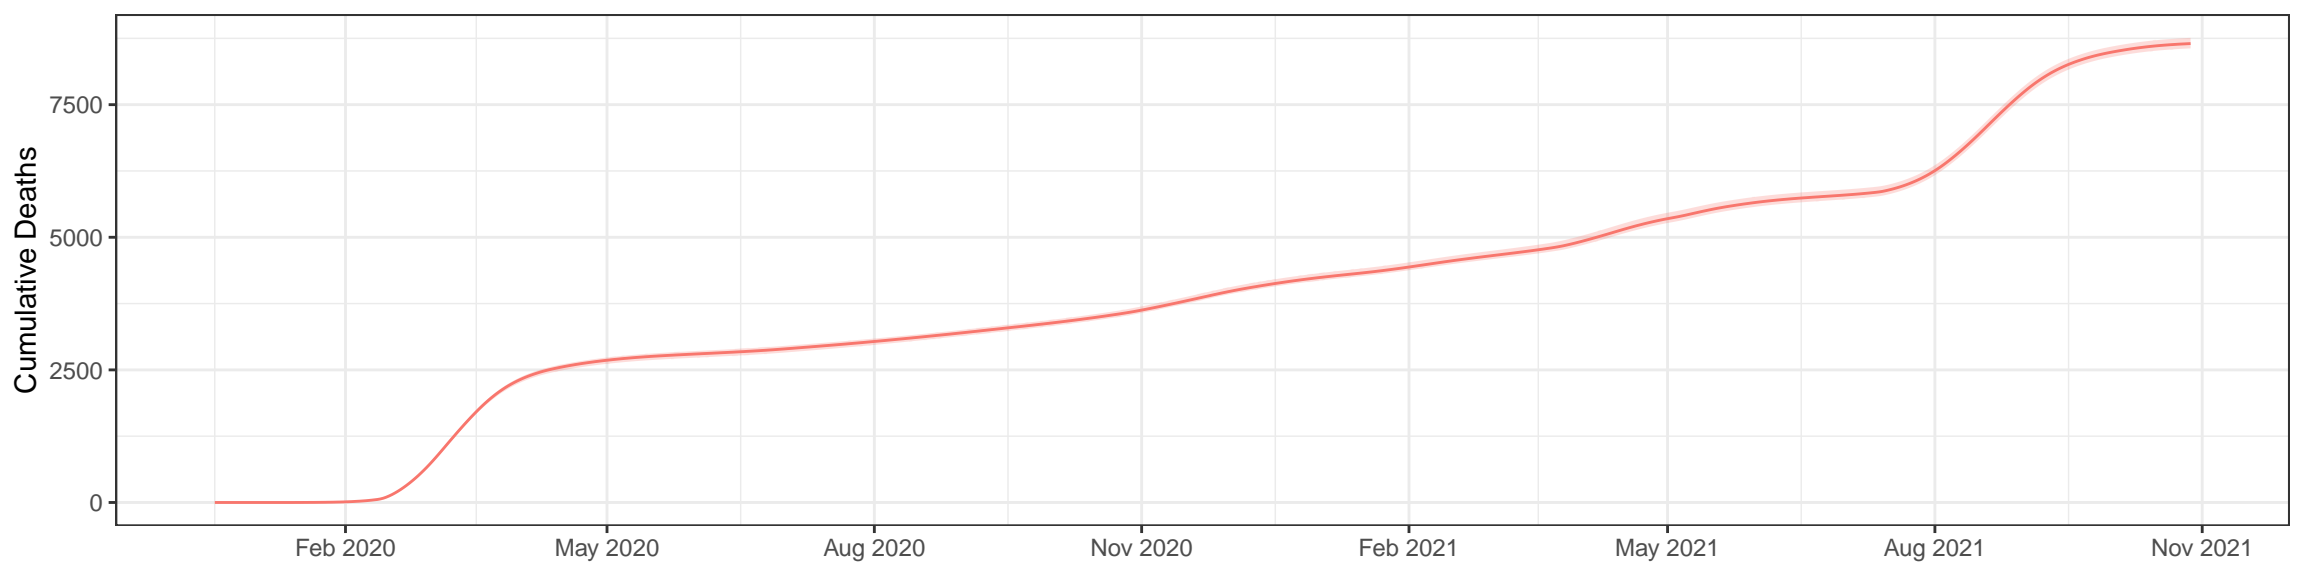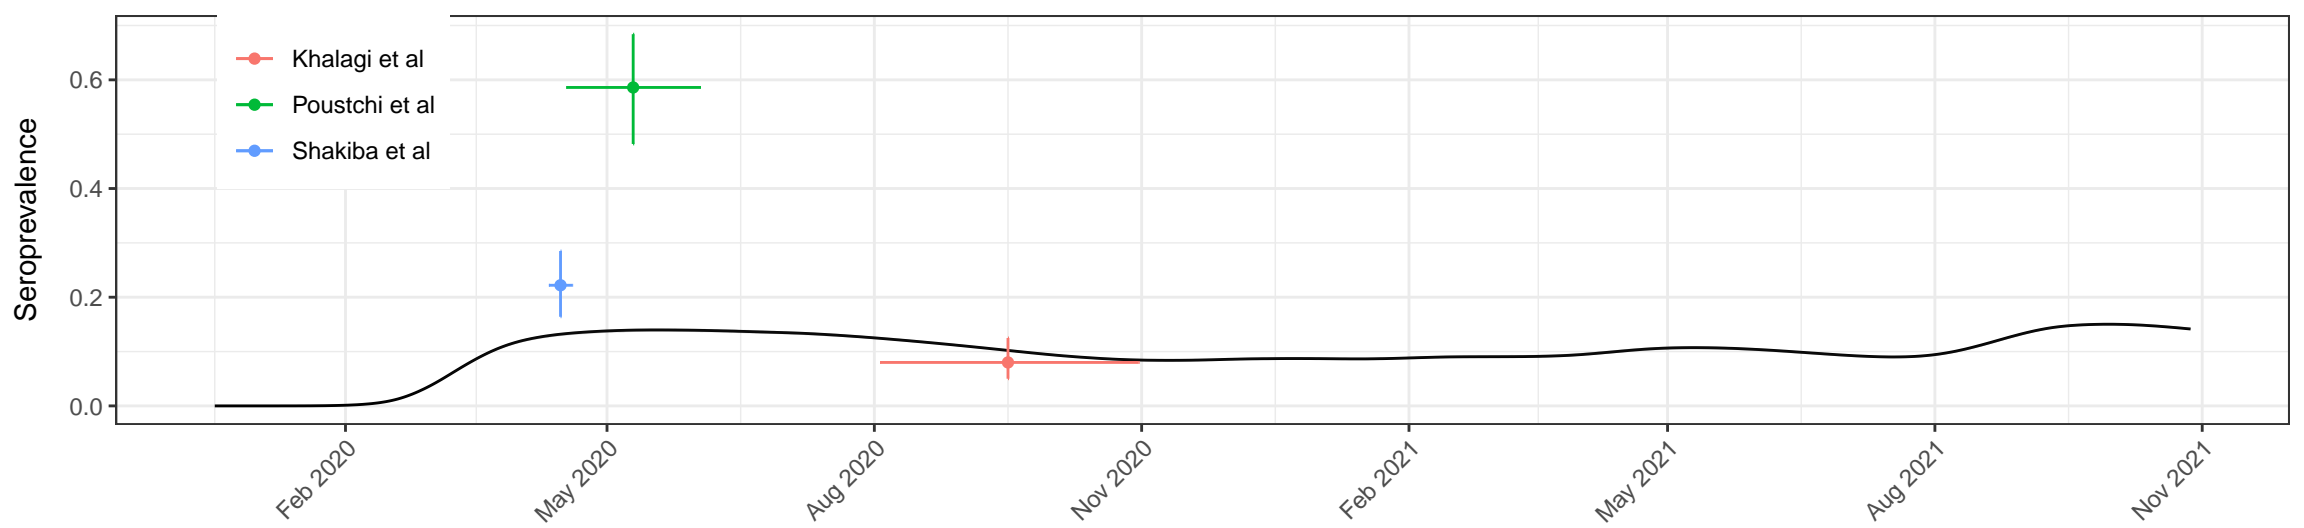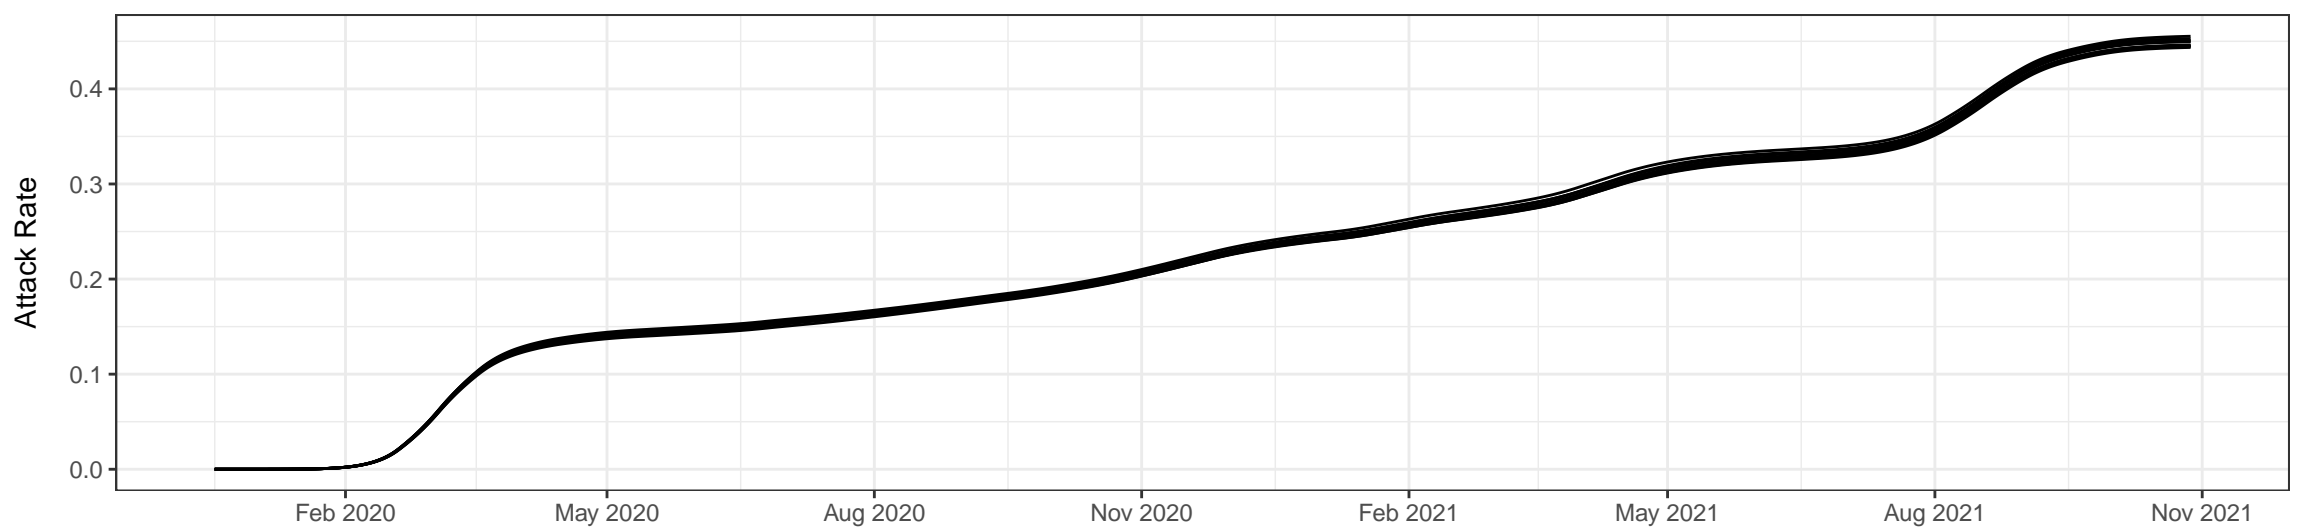

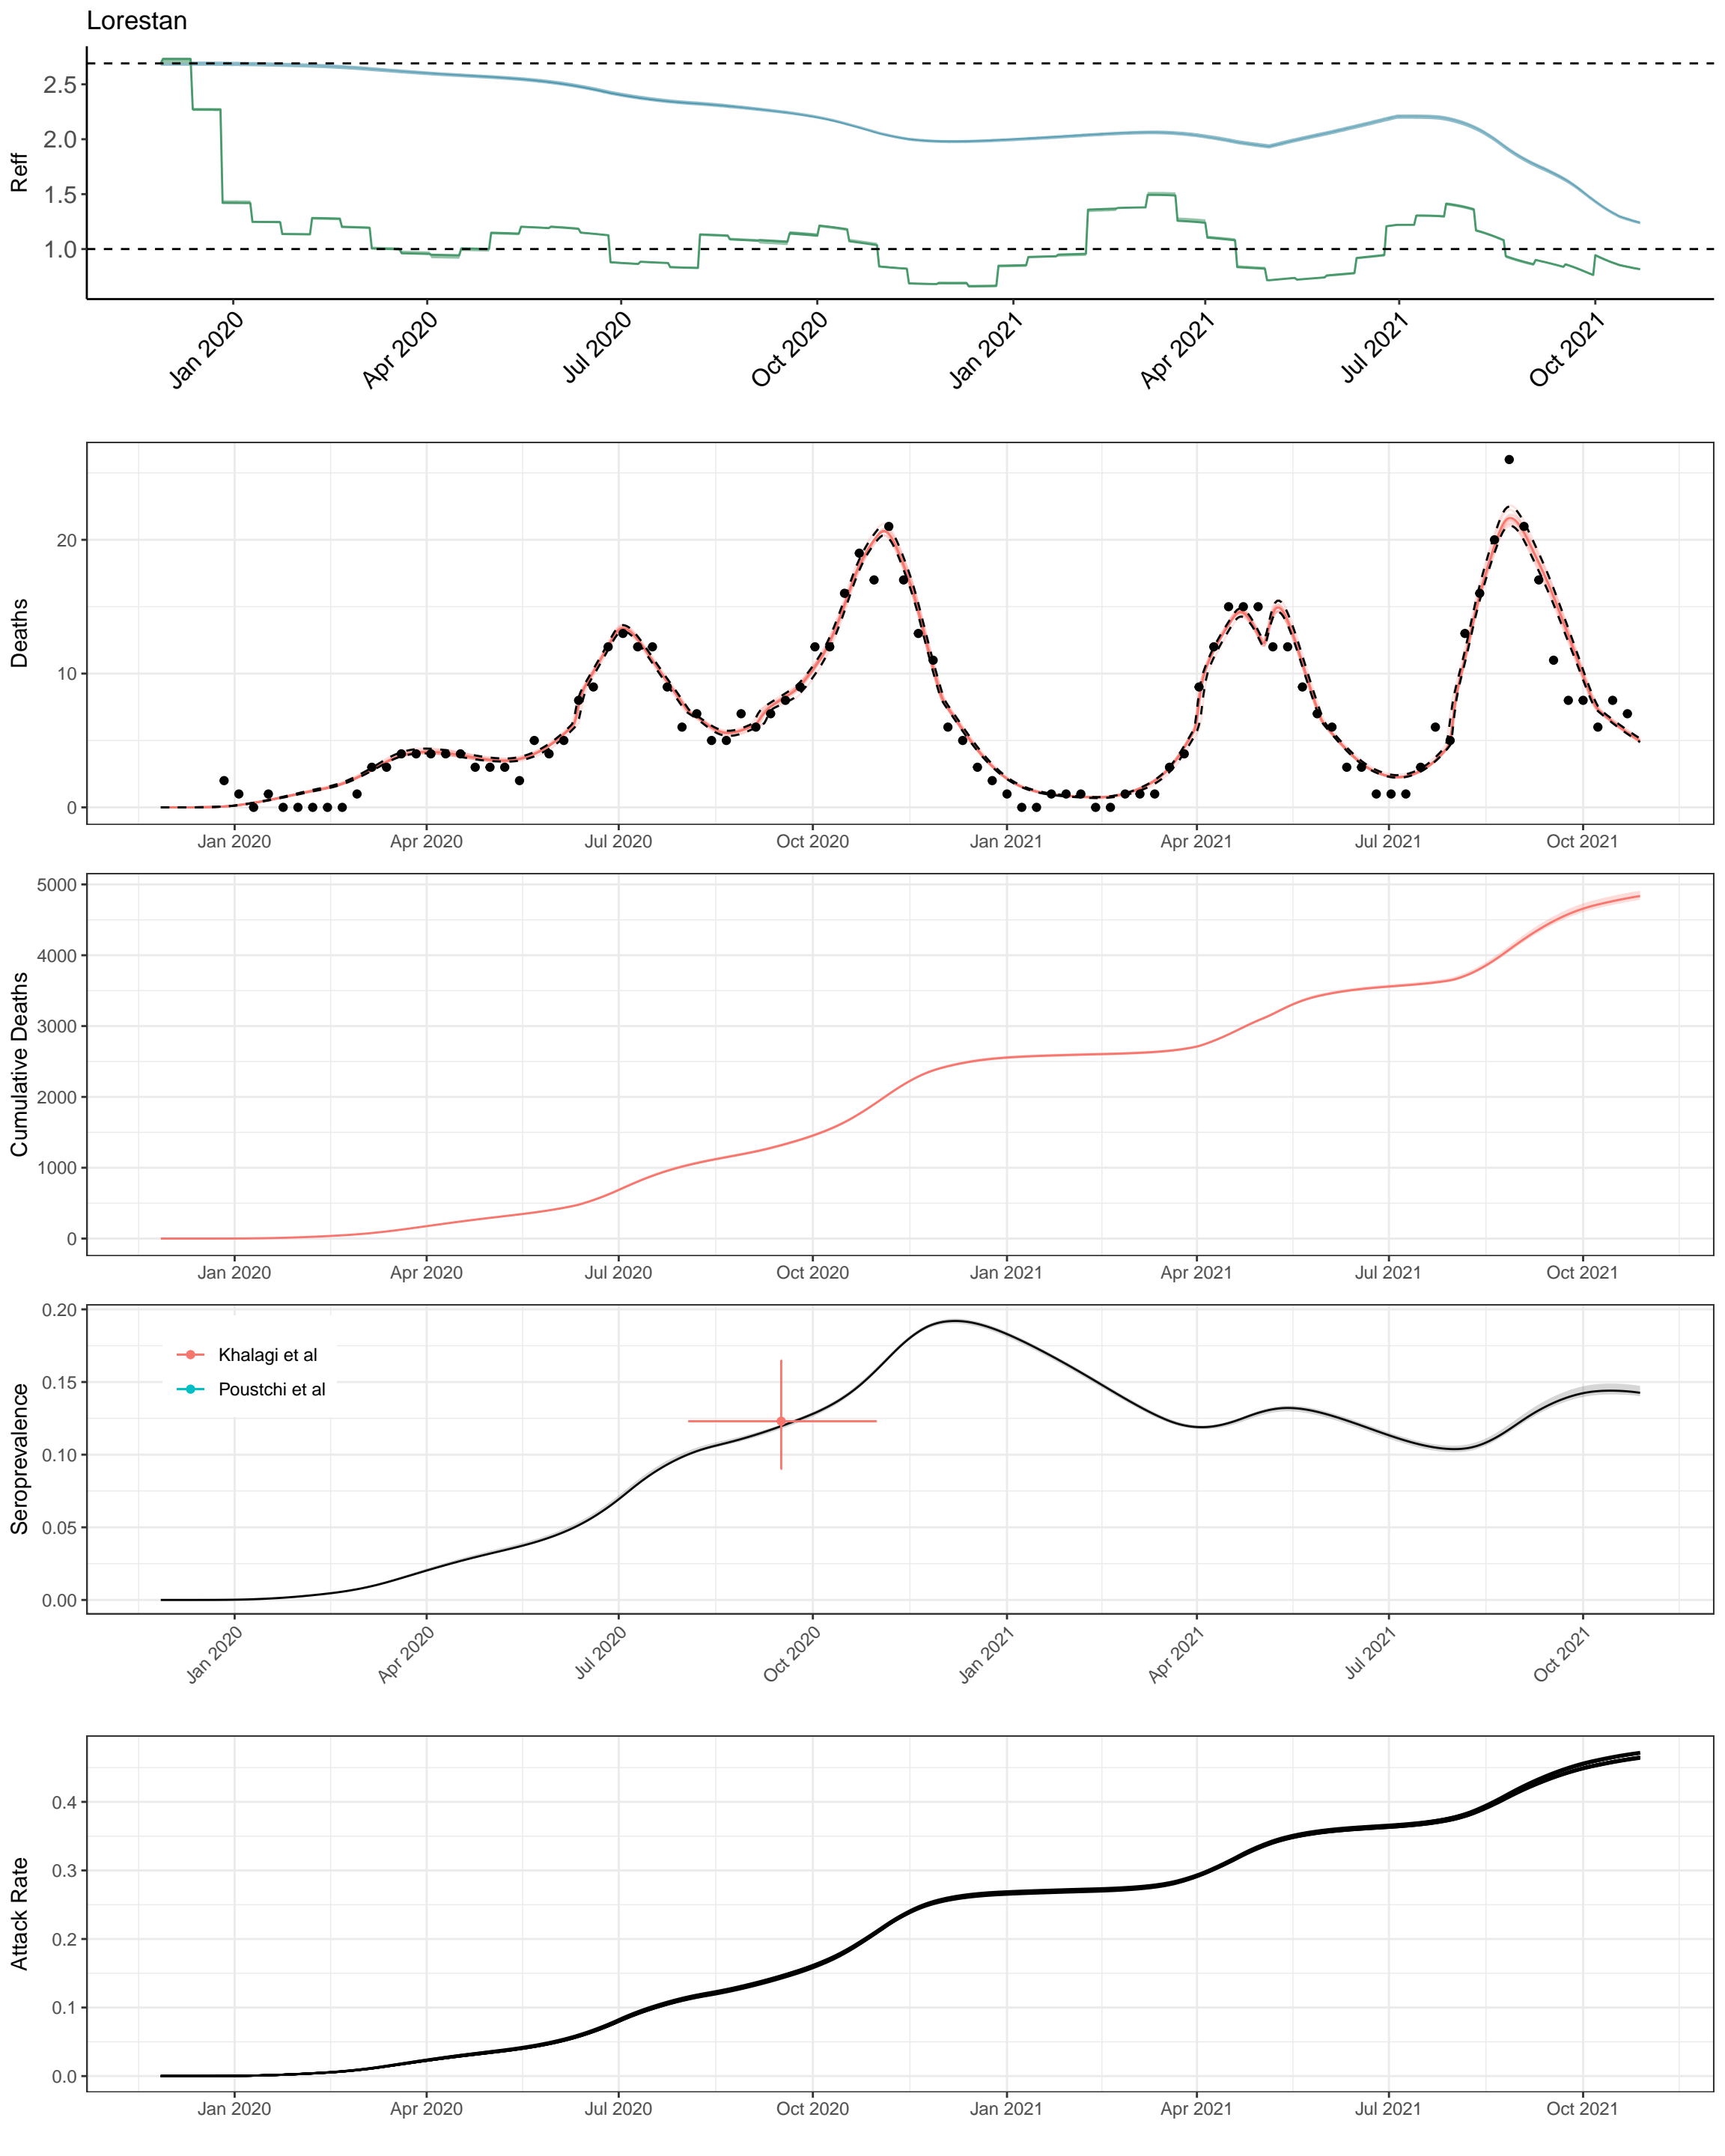

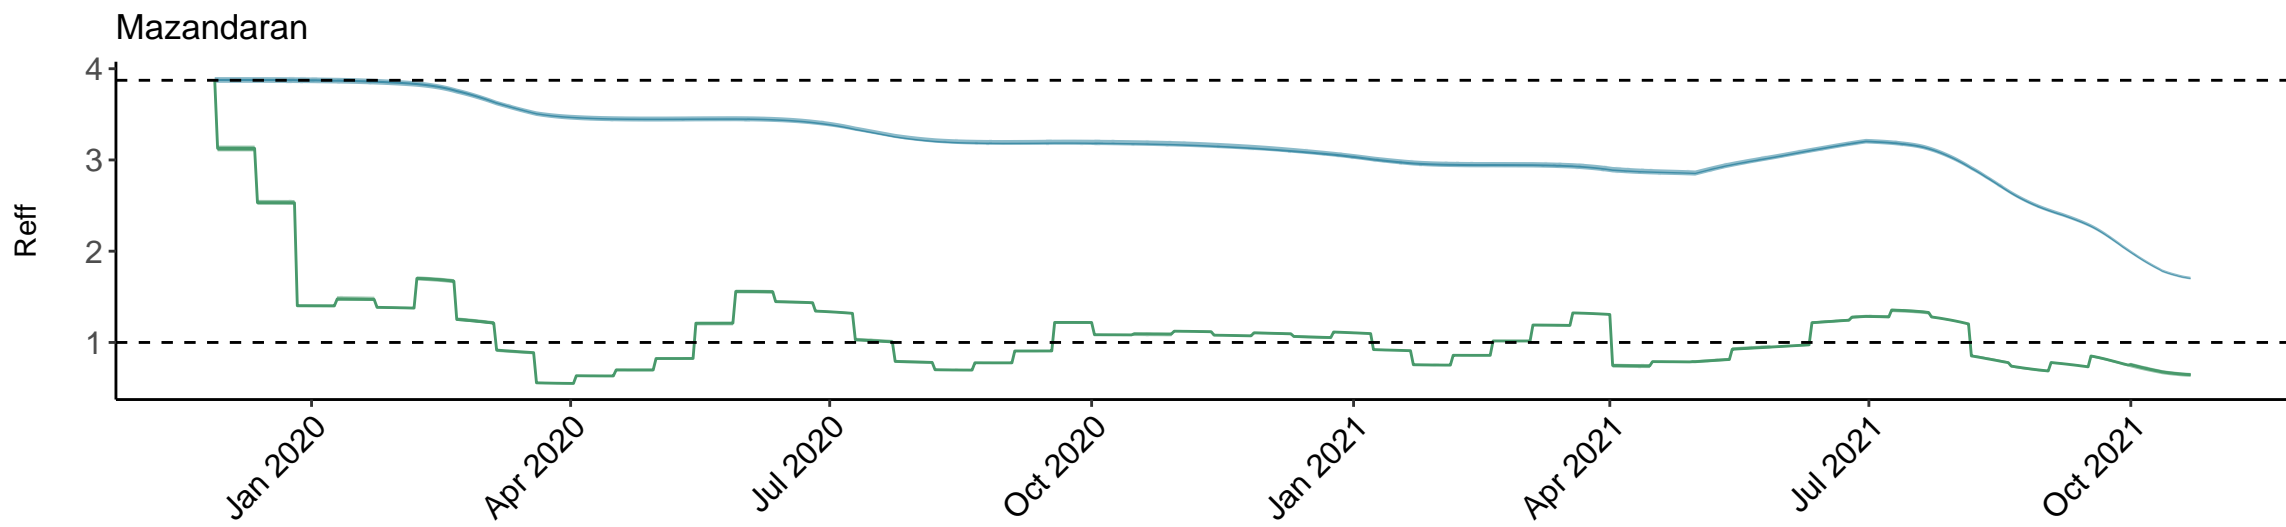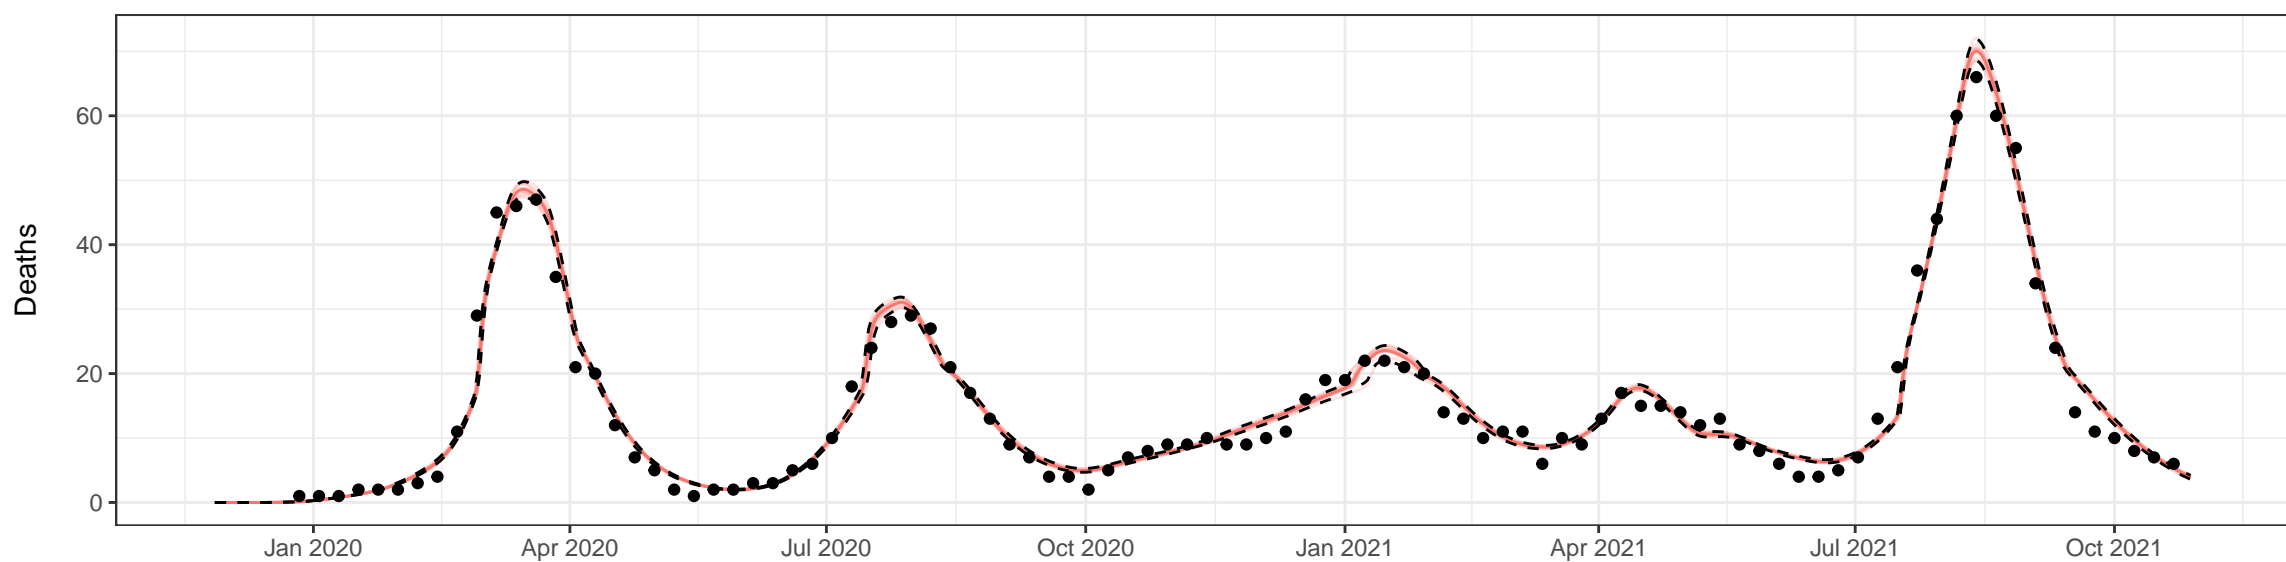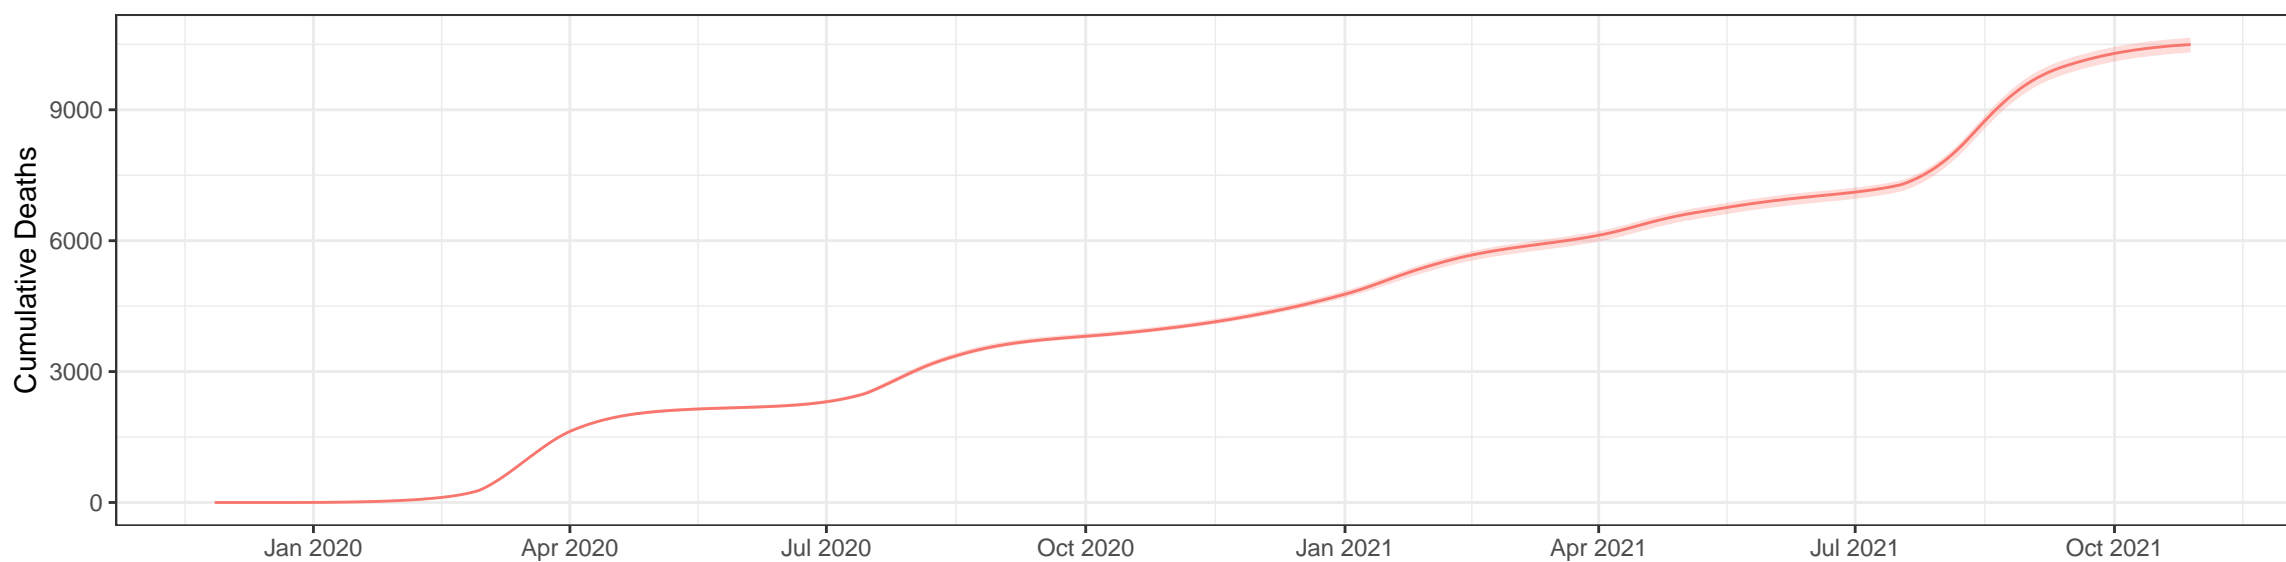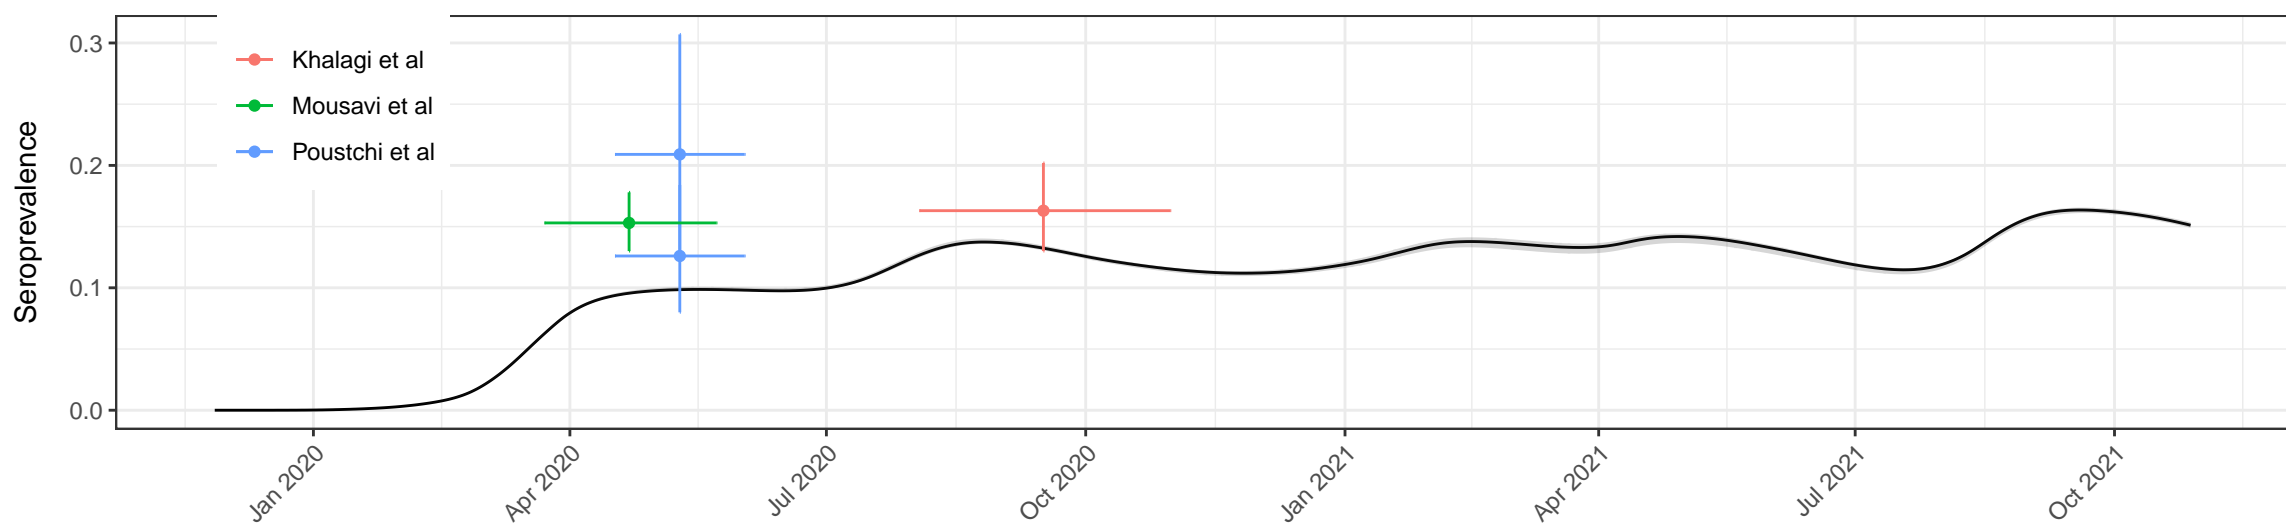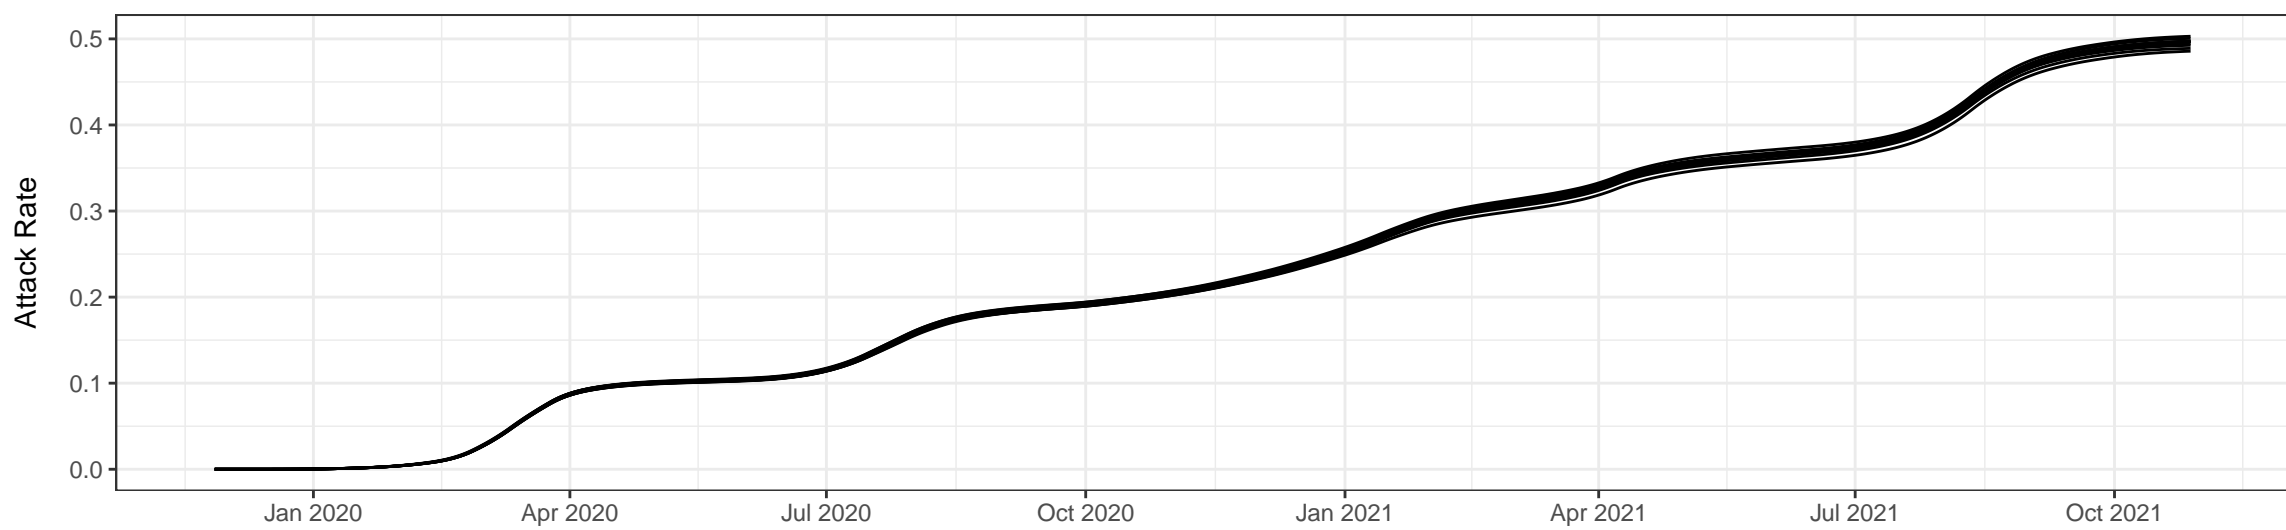

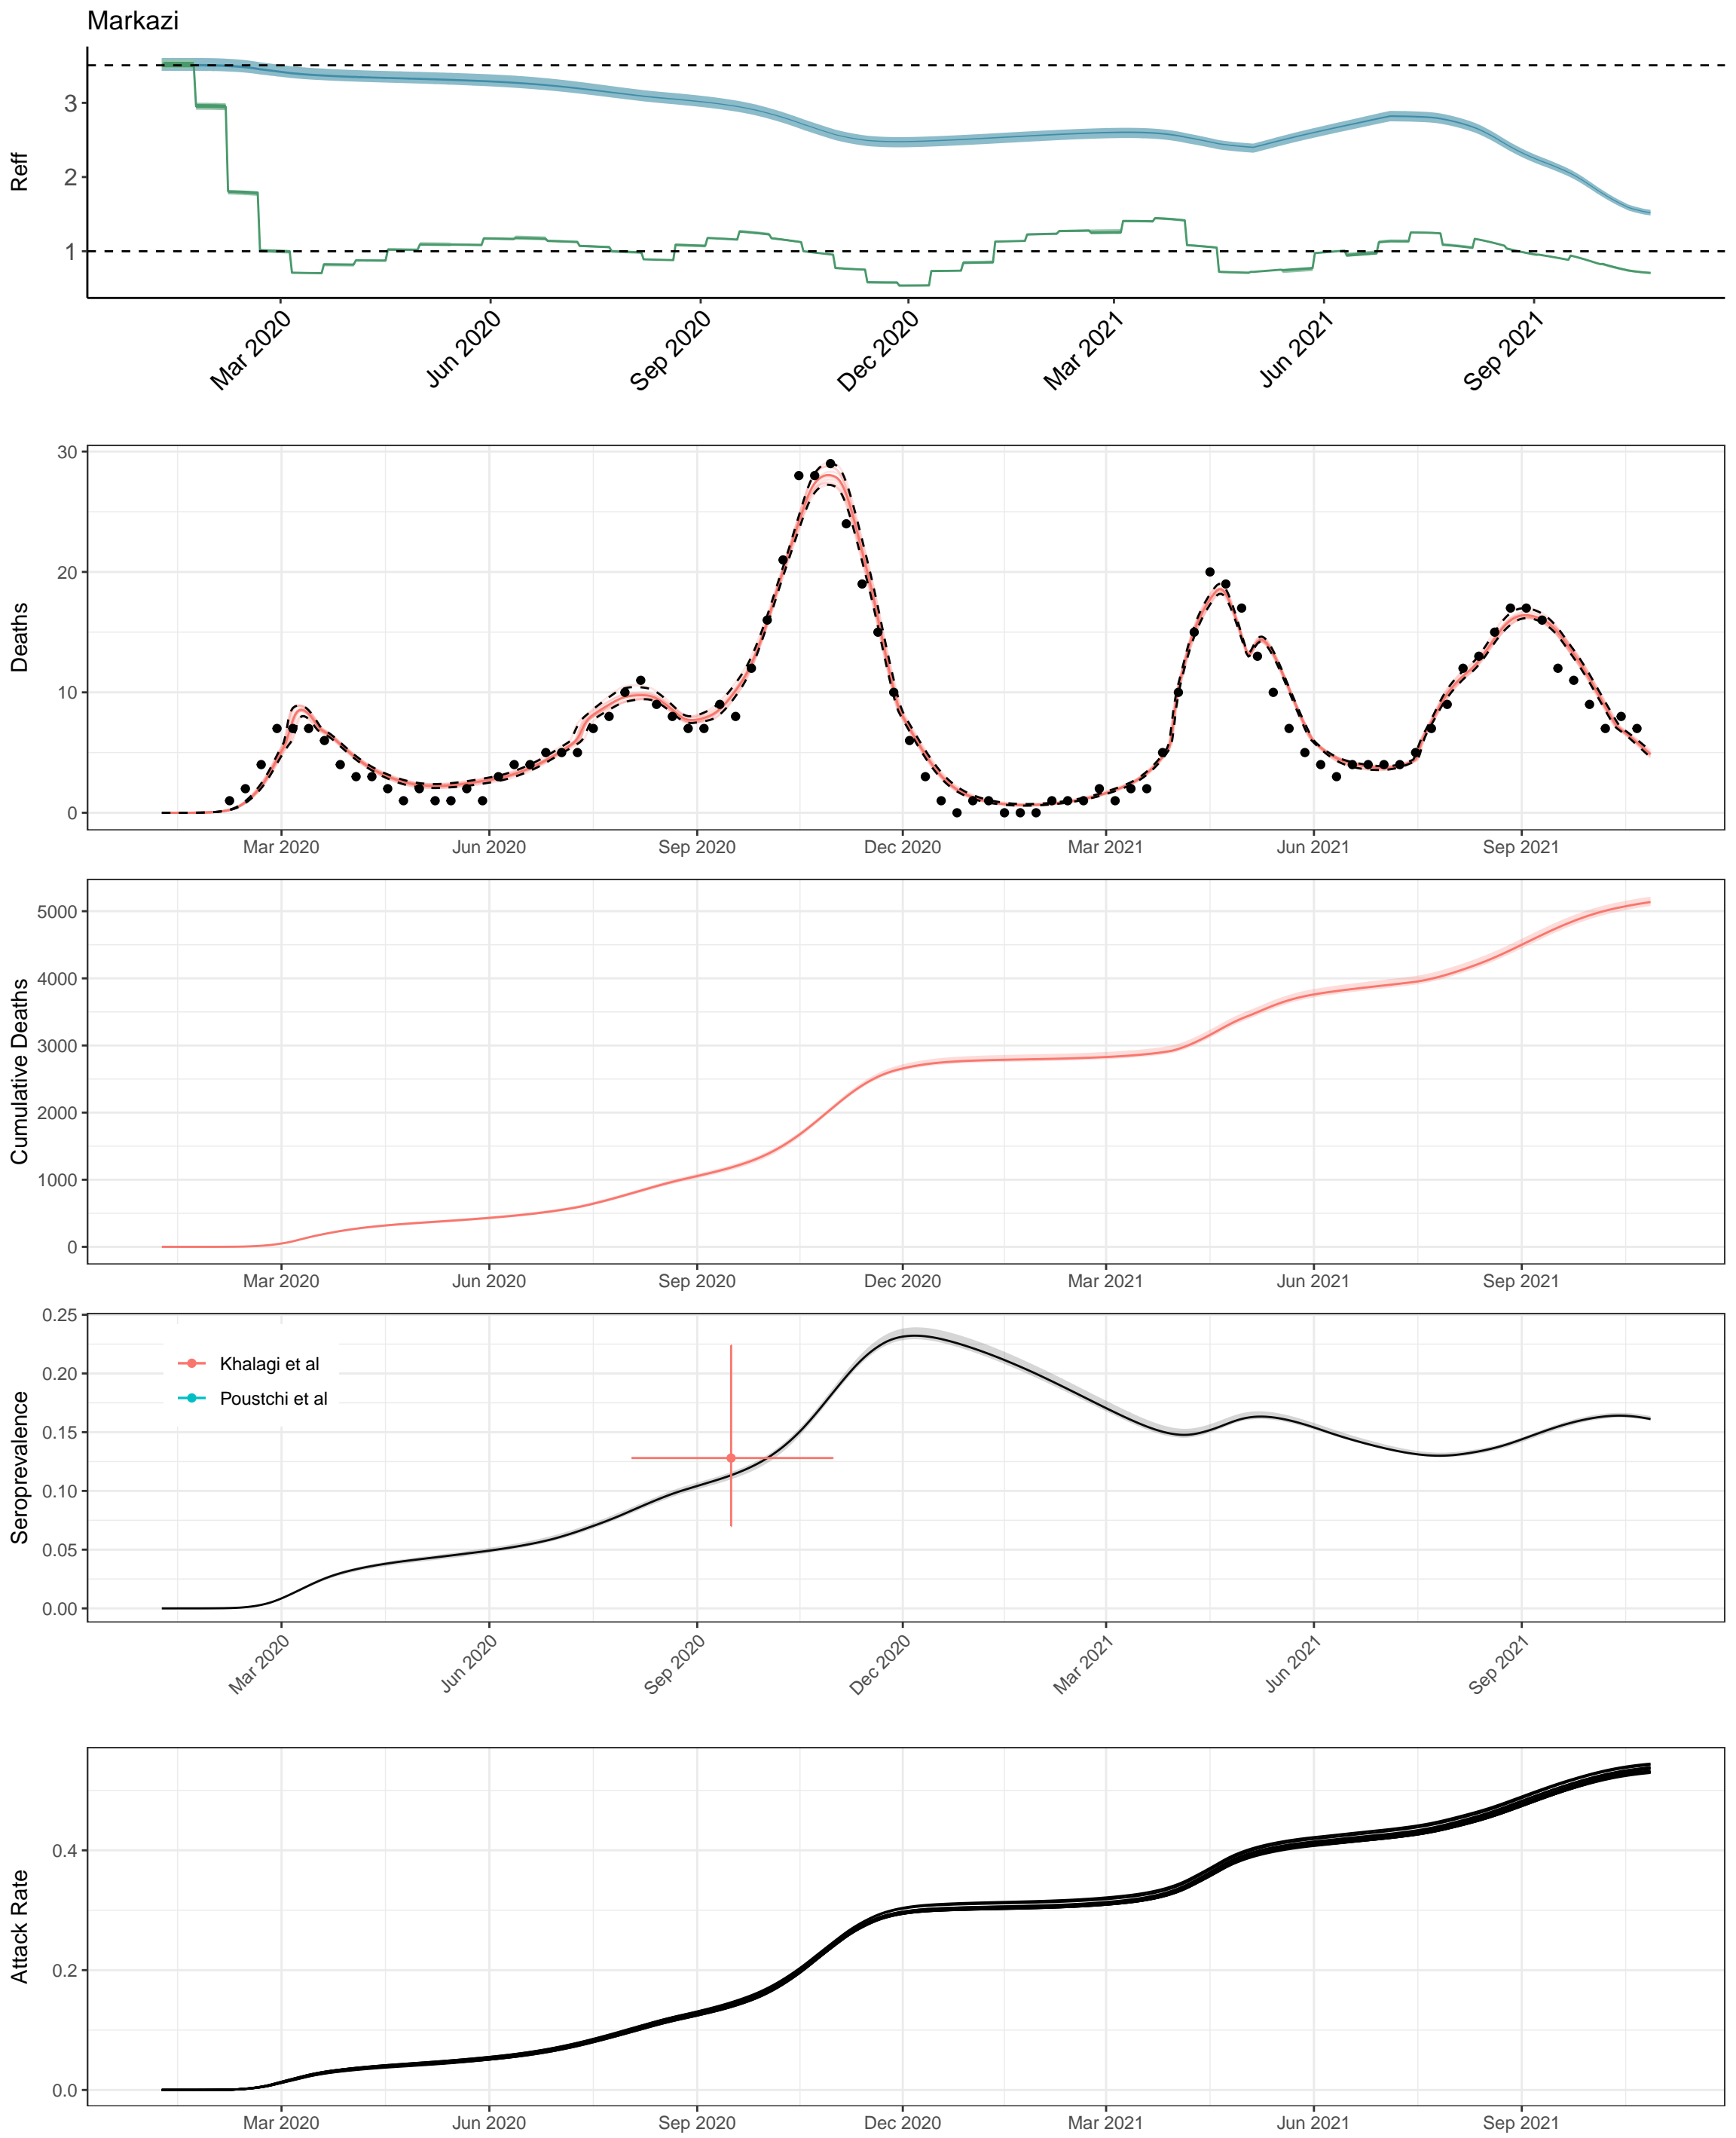

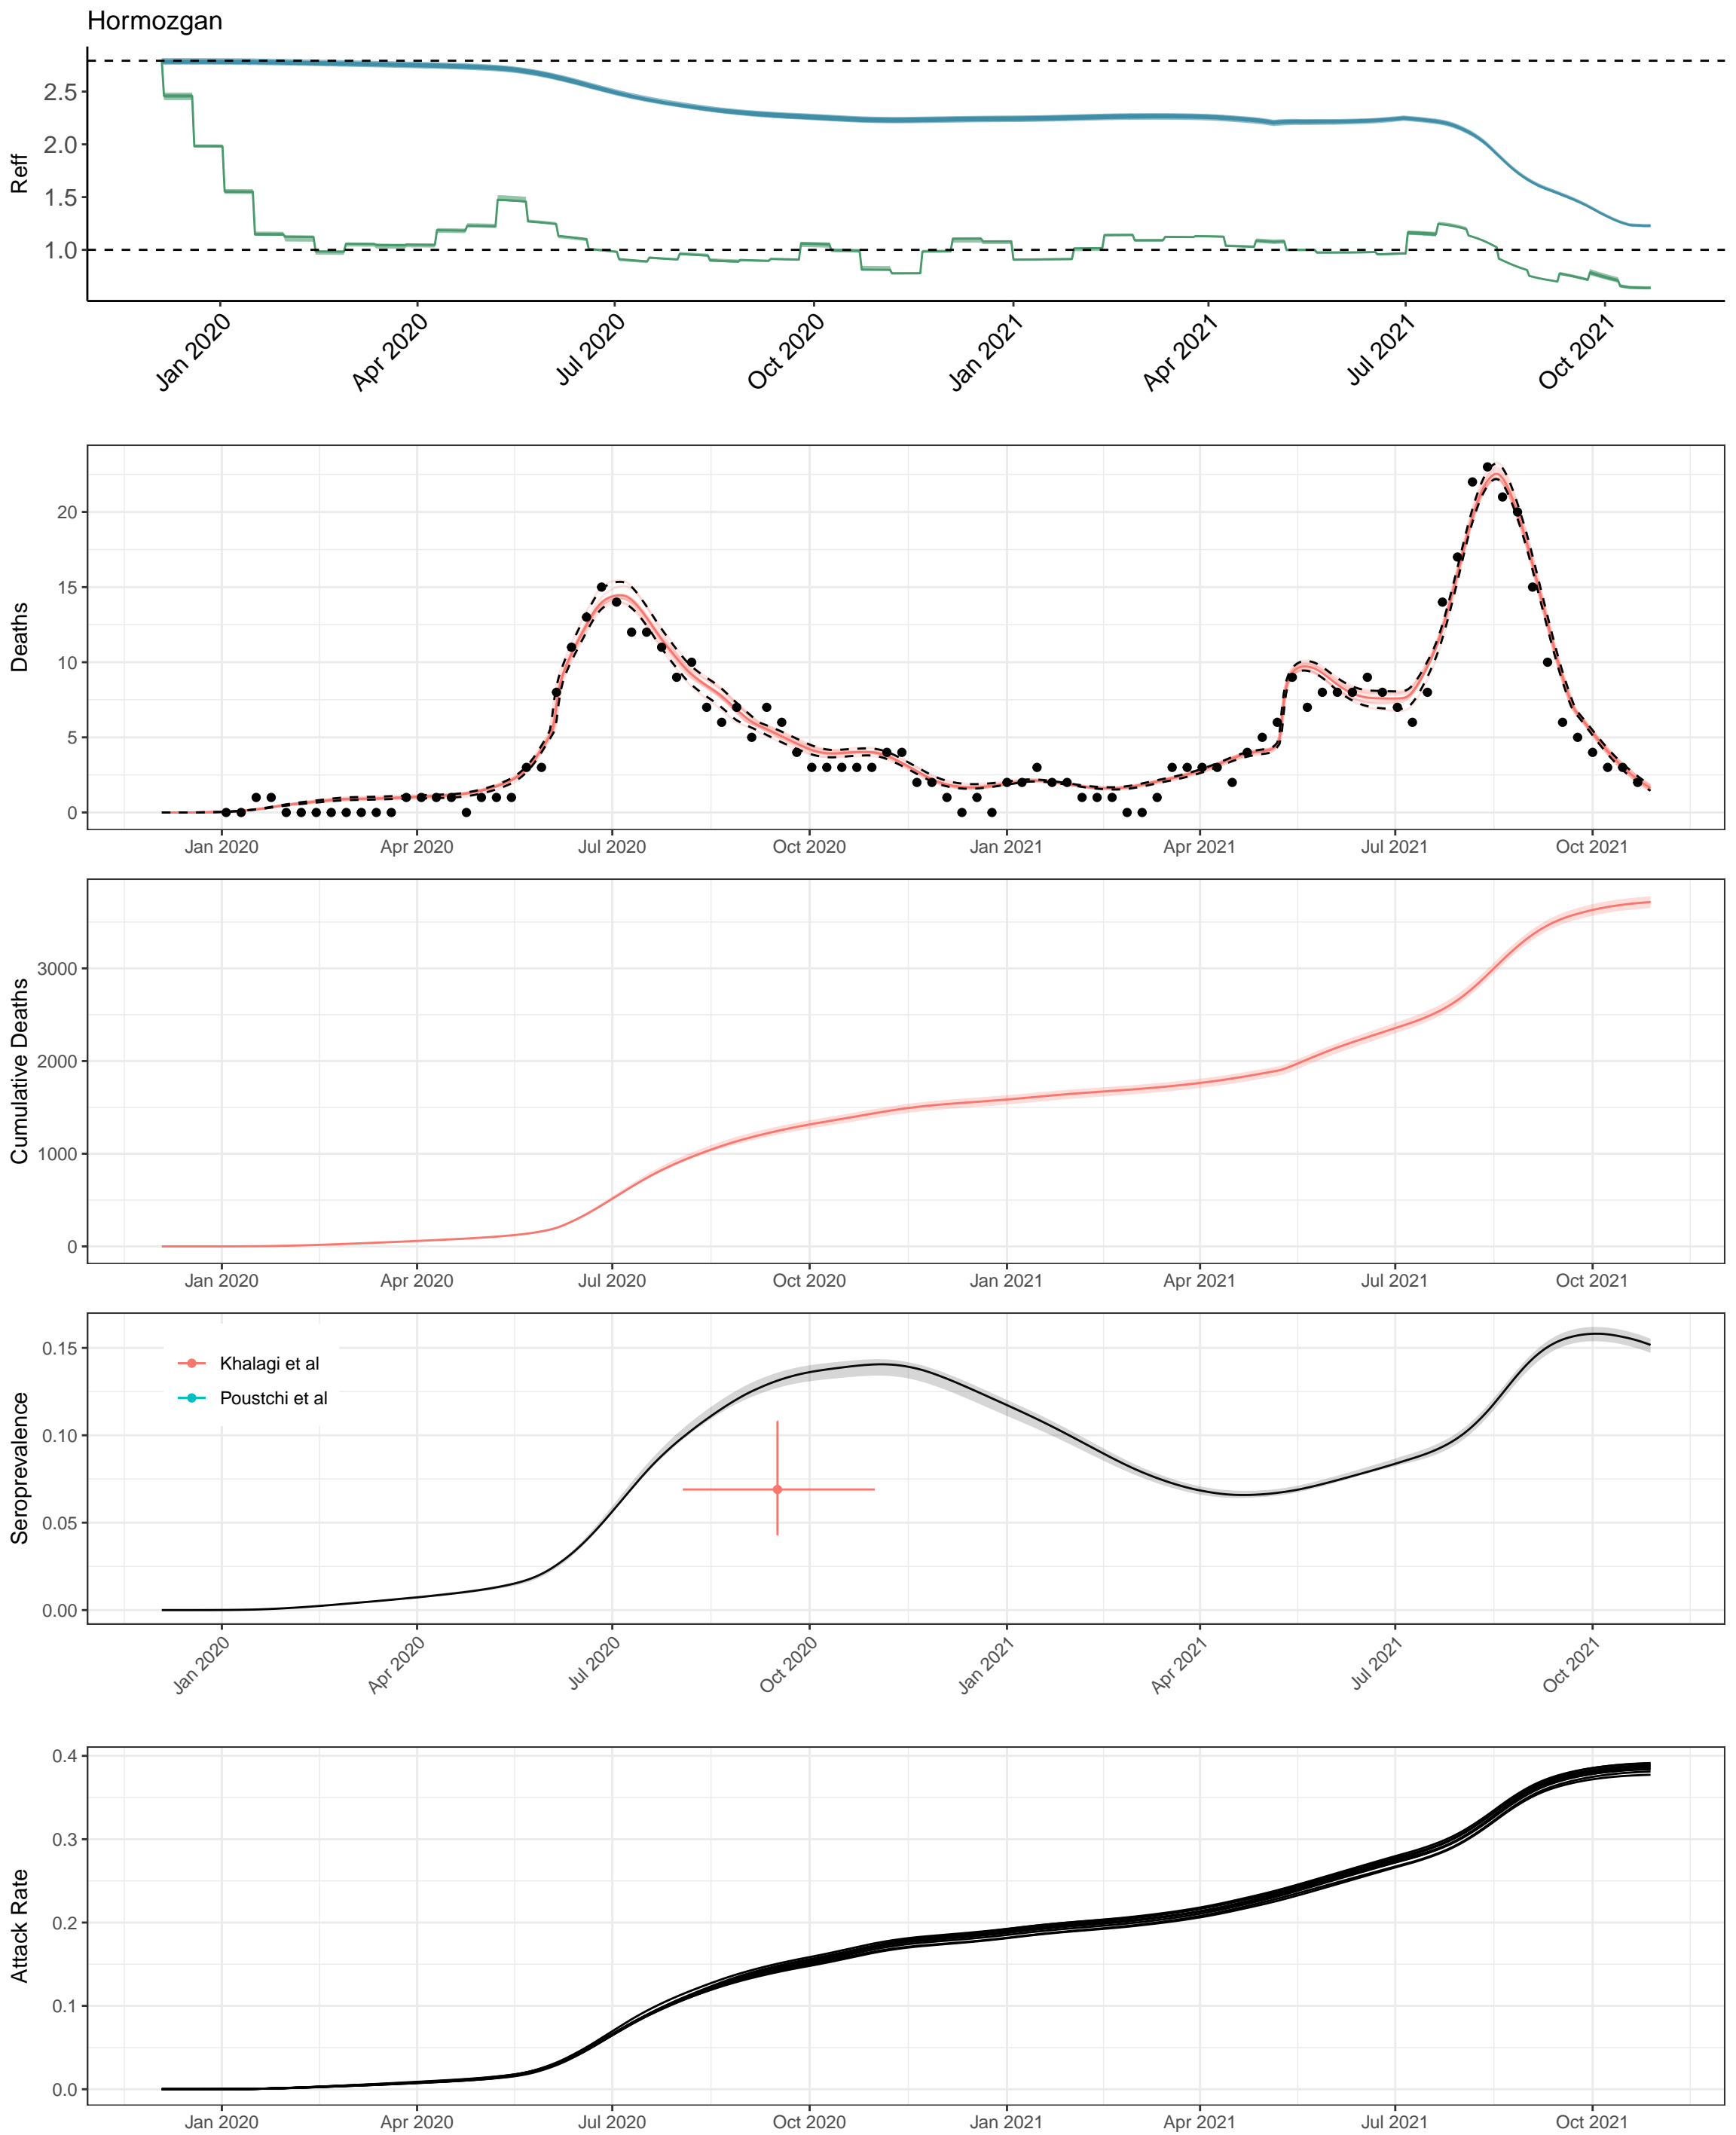

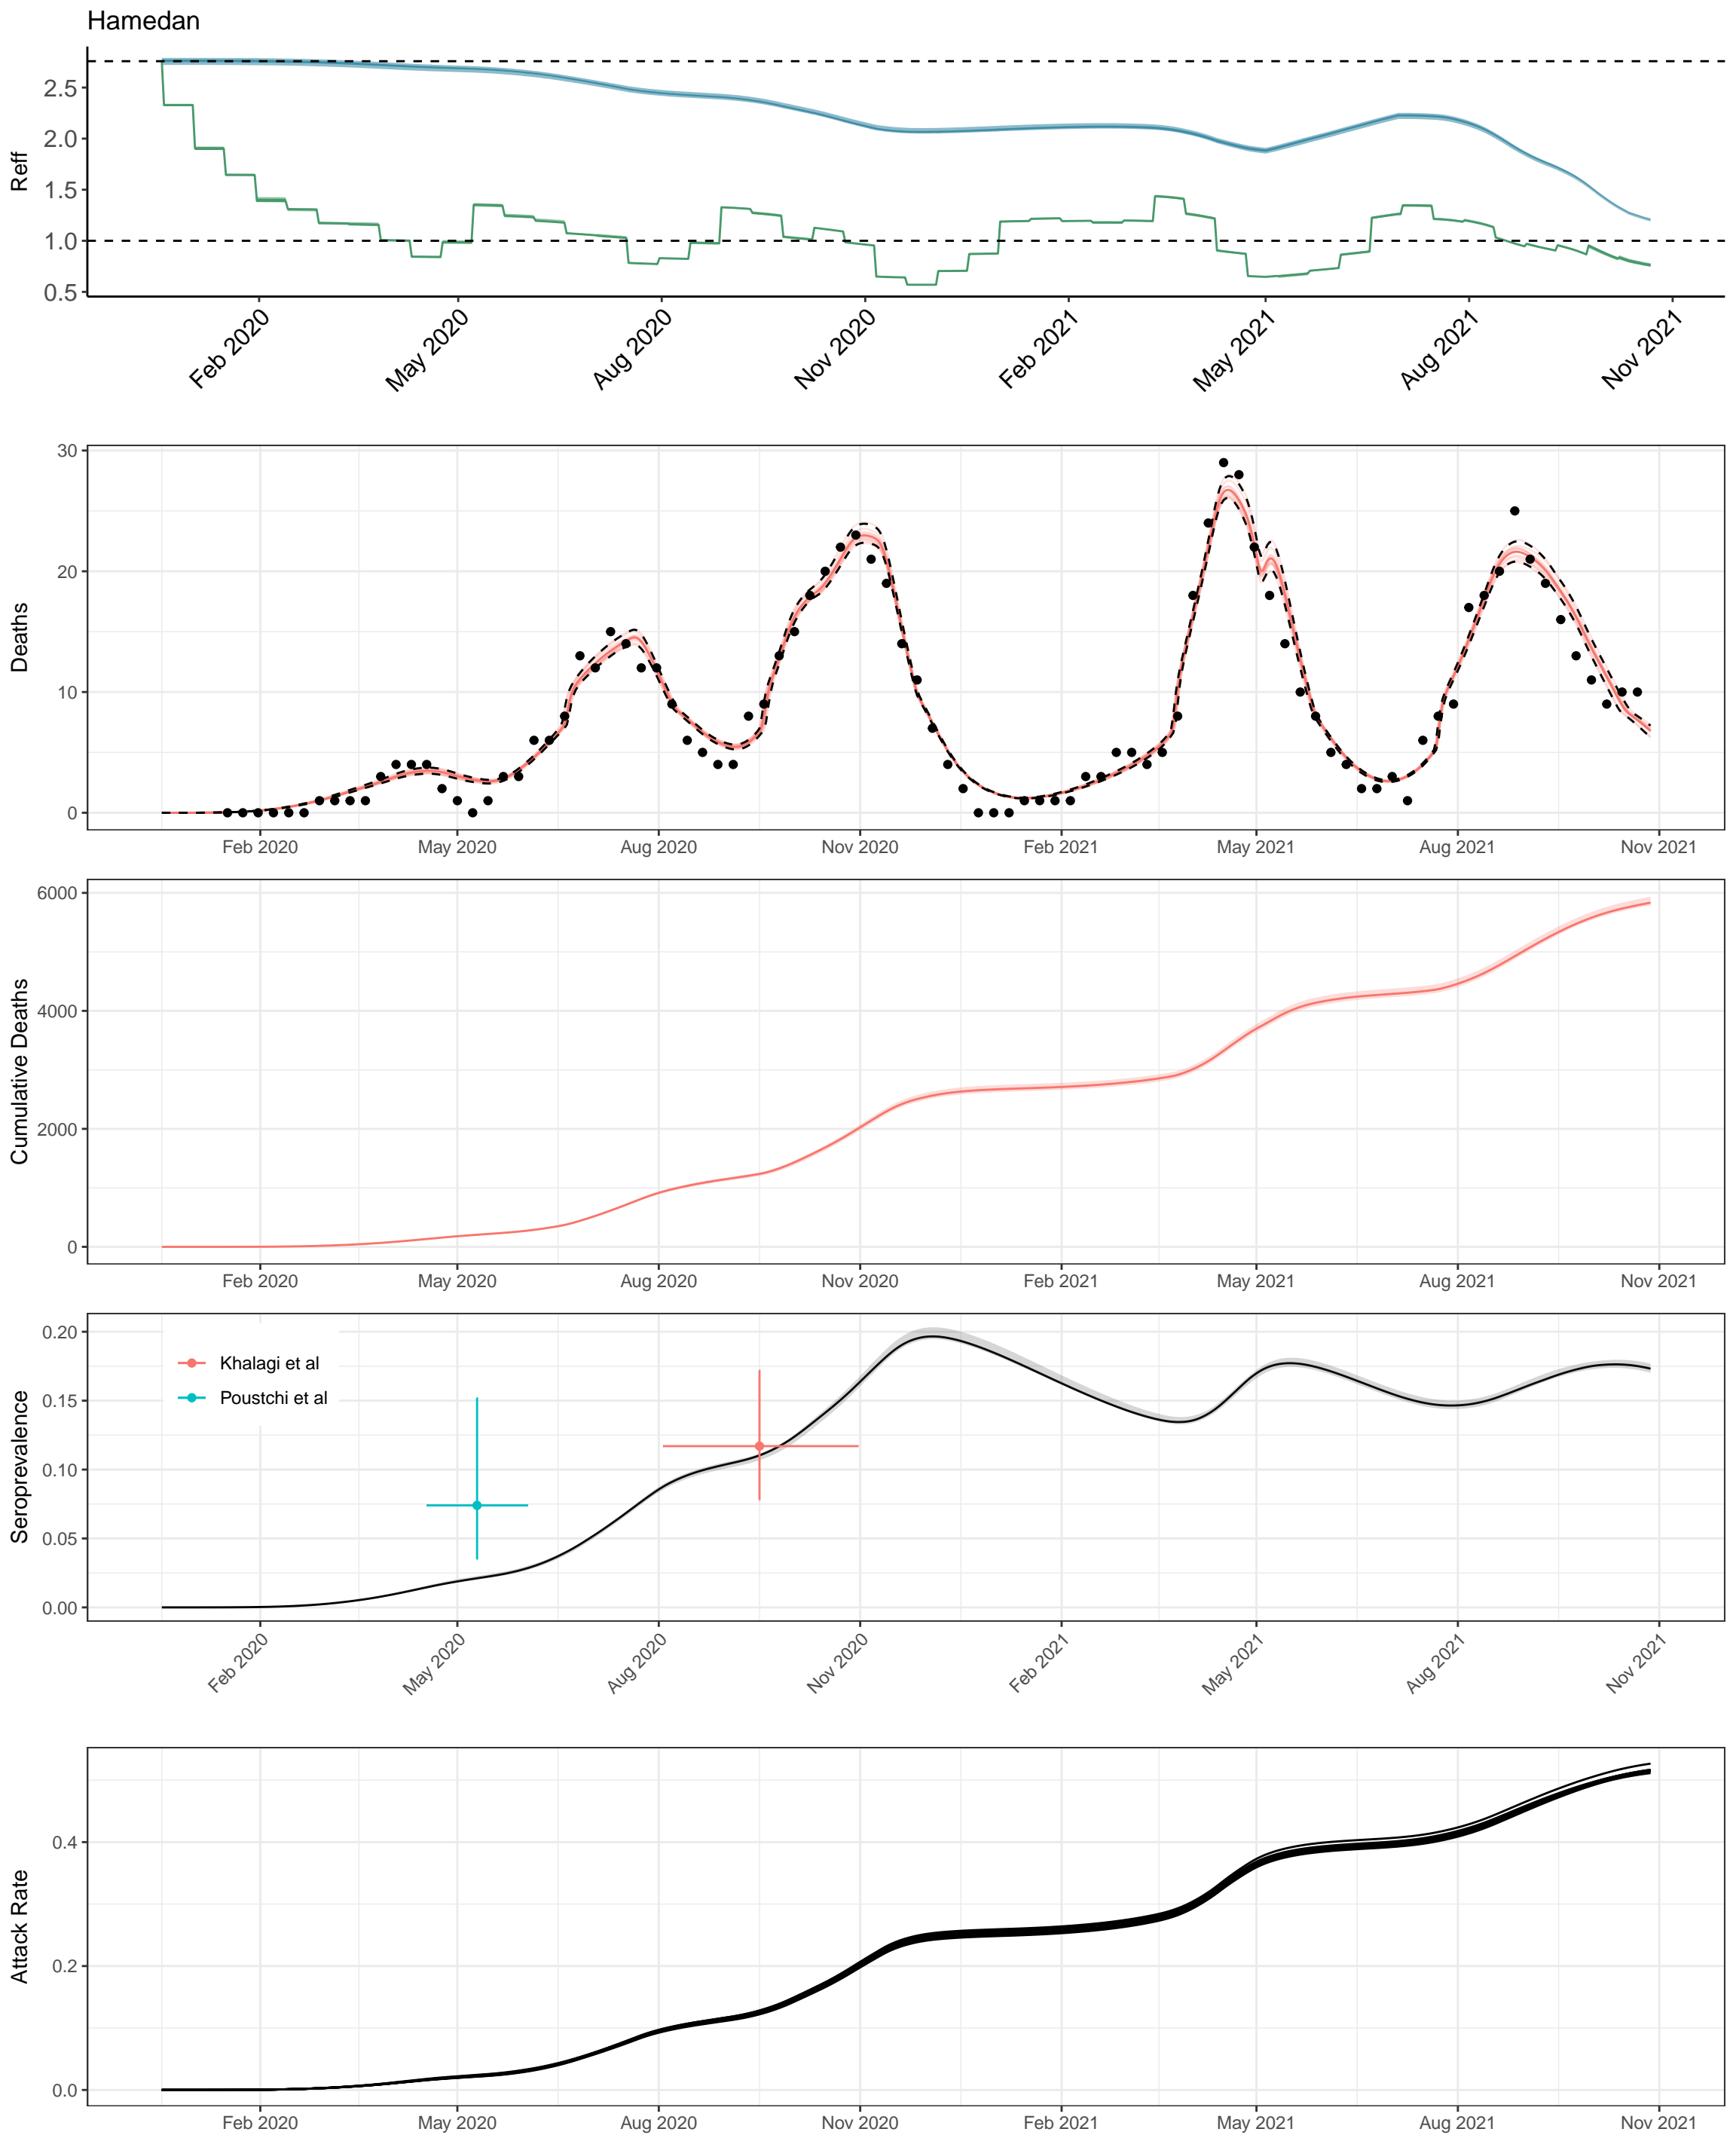

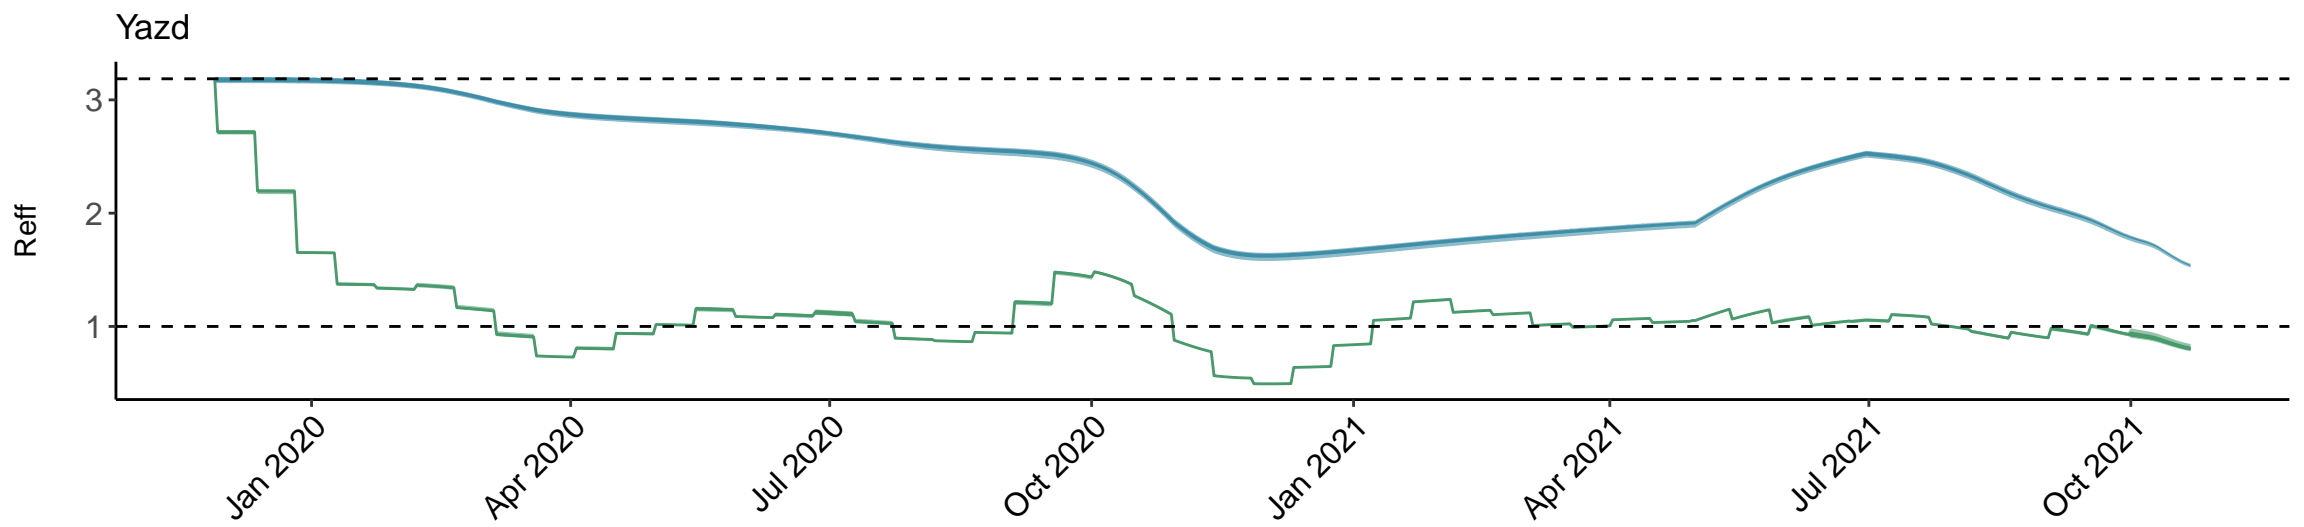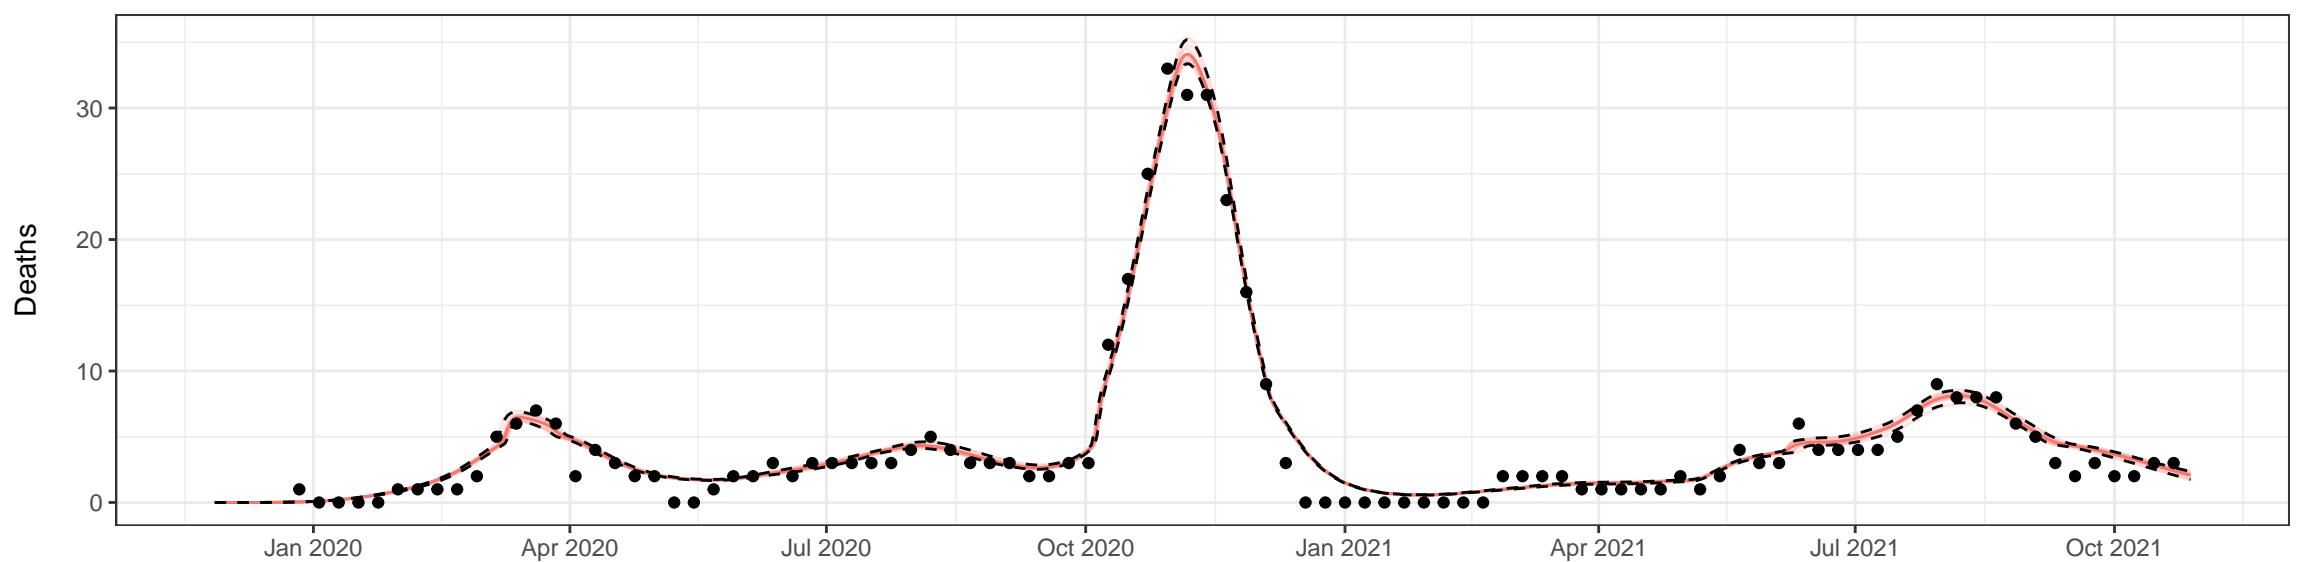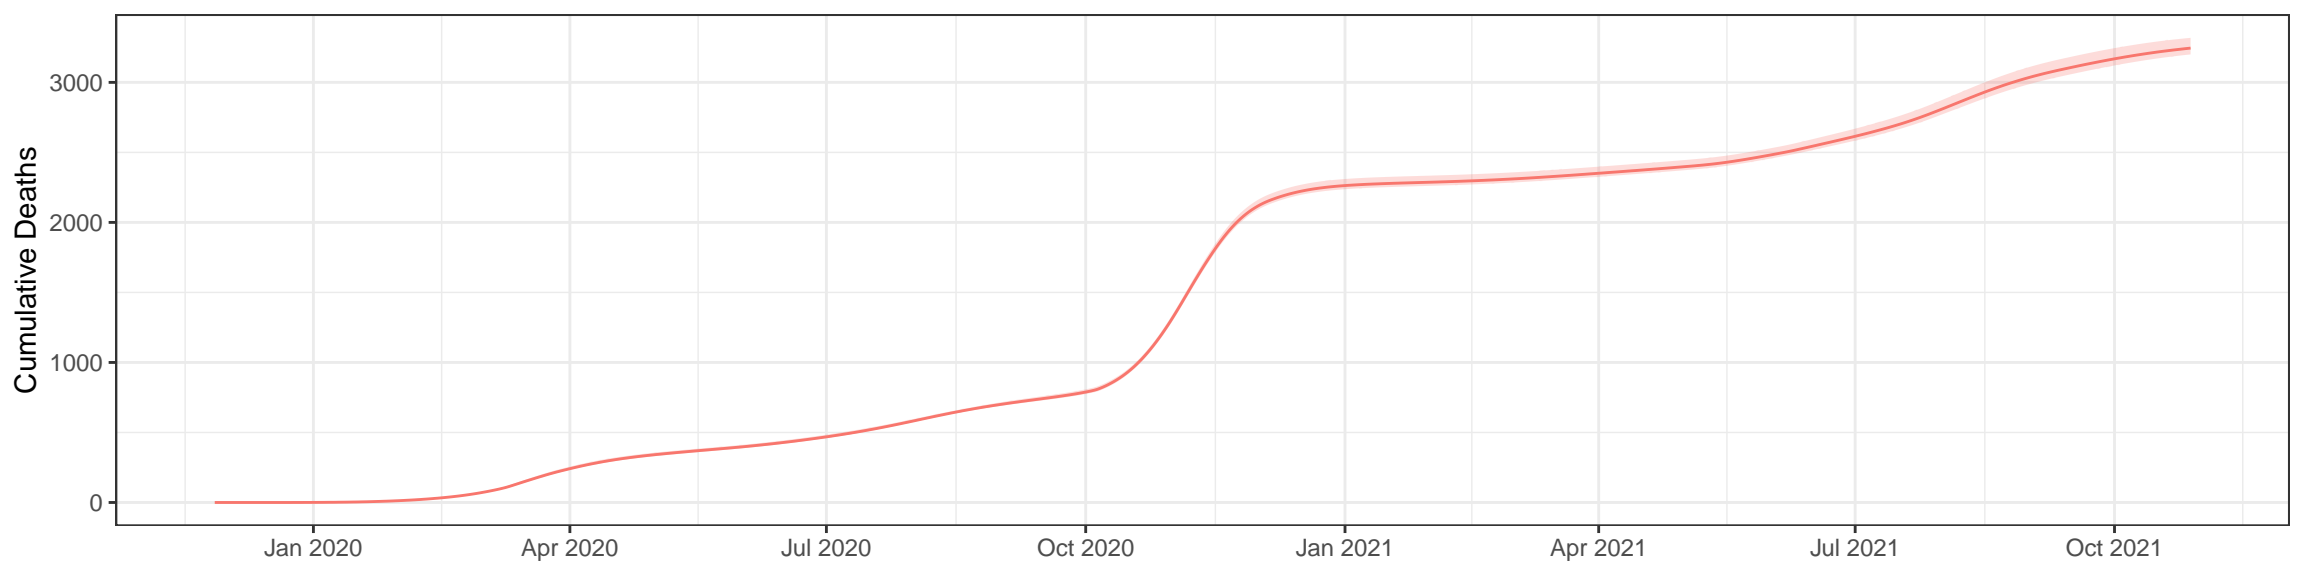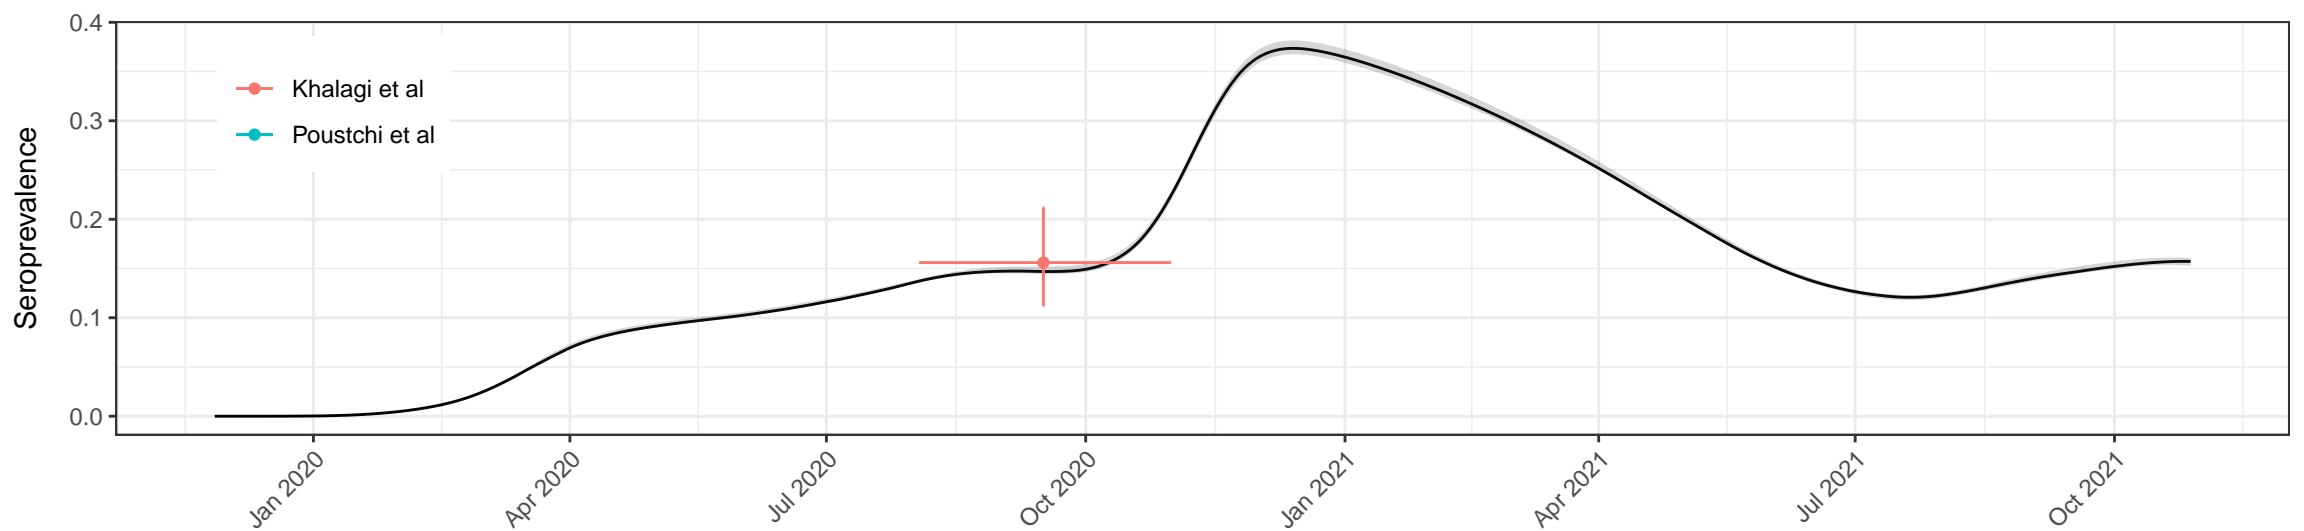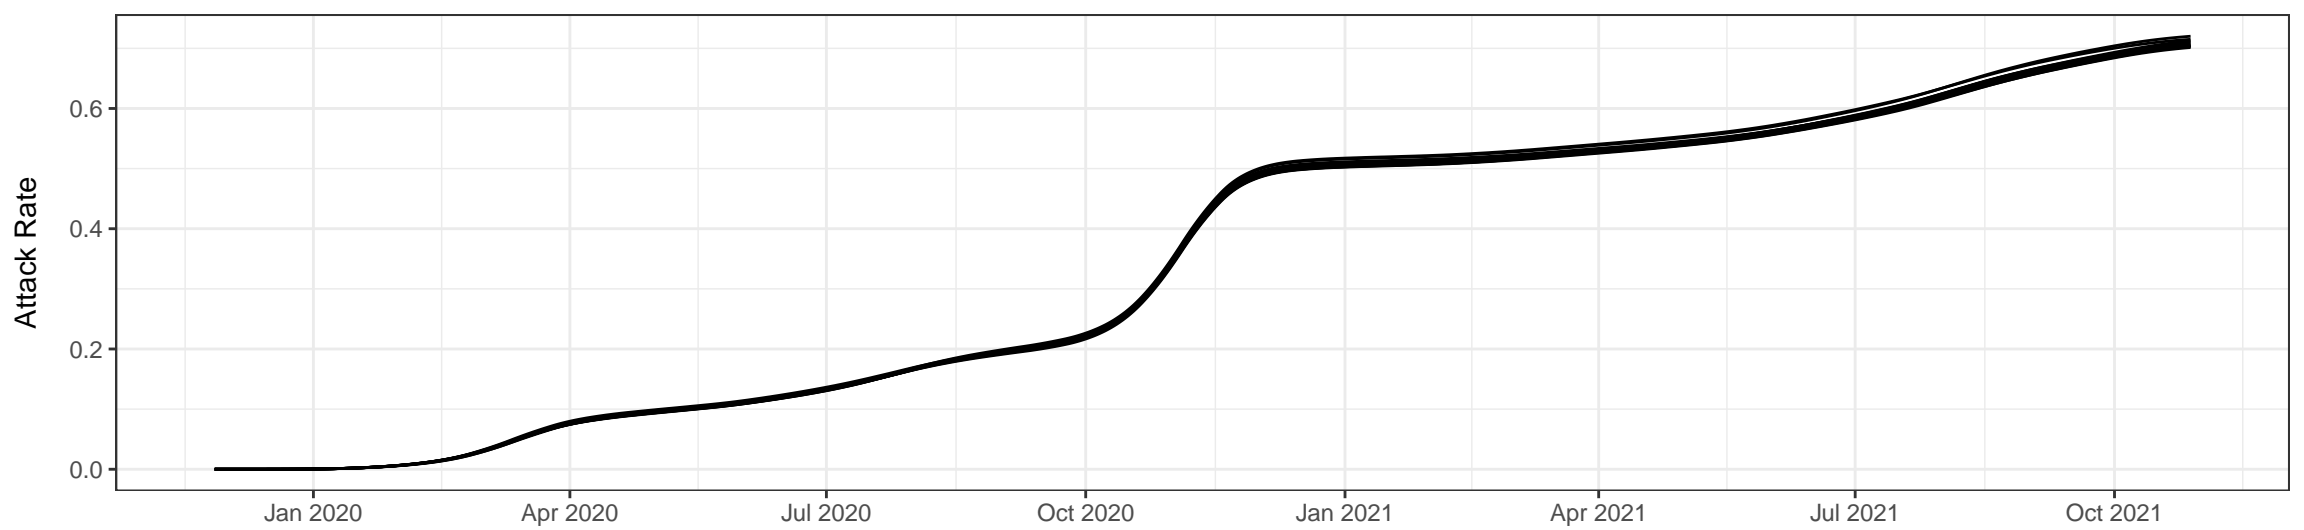

Supplement: Supplementary file [file media-1.zip]
